# Supplementary material for: Characterization of organic aerosols from a Chinese Mega-City during winter: predominance of fossil fuel combustion
Source: Copernicus journal article supplement (doi:10.5194/acp-2018-969), 2018-10-22
Supplement: Supplementary file 1 [file acp-2018-969-supplement.pdf]

1 Supporting information for

2 **Characterization of organic aerosols from a Chinese Mega-City during winter:**  
3 **predominance of fossil fuel combustion**

4

5 **Md. Mozammel Haque<sup>1,2,3</sup>, Kimitaka Kawamura<sup>2</sup>, Dhananjay K. Deshmukh<sup>2</sup>, Cao**  
6 **Fang<sup>1,3</sup>, Wenhui Song<sup>1,3</sup>, Bao Mengying<sup>1,3</sup> and Yan-Lin Zhang<sup>1,3\*</sup>**

7

8 <sup>1</sup> *Yale-NUIST Center on Atmospheric Environment, Department of Applied Meteorology,*  
9 *Nanjing University of Information Science and Technology, Nanjing 10044, China*

10 <sup>2</sup> *Chubu Institute for Advanced Studies, Chubu University, Kasugai 487-8501, Japan*

11 <sup>3</sup> *Key Laboratory of Meteorological Disaster, Ministry of Education & Collaborative*  
12 *Innovation Center on Forecast and Evaluation of Meteorological Disasters, Nanjing*  
13 *University of Information Science and Technology, Nanjing 10044, China*

14

15

16 \*Corresponding author: Yan-Lin Zhang

17 E-mail: dryanlinzhang@outlook.com

18

19

20

21

22

23

24

25

26

27

28

29

30

31

32

33 **Table S1.** Concentrations of identified organic compounds (ng m<sup>-3</sup>) in the atmospheric aerosol  
 34 samples (PM<sub>2.5</sub>) from Nanjing, China.  
 35

| Compounds                               | Daytime |                  |                  |                 | Nighttime |                  |                  |                 |
|-----------------------------------------|---------|------------------|------------------|-----------------|-----------|------------------|------------------|-----------------|
|                                         | Mean    | Min <sup>a</sup> | Max <sup>b</sup> | SD <sup>c</sup> | Mean      | Min <sup>a</sup> | Max <sup>b</sup> | SD <sup>c</sup> |
| <i>n</i> -Alkanes                       |         |                  |                  |                 |           |                  |                  |                 |
| C <sub>13</sub>                         | 1.91    | 1.59             | 3.27             | 0.29            | 1.93      | 1.58             | 3.50             | 0.39            |
| C <sub>14</sub>                         | 1.24    | 0.89             | 2.16             | 0.27            | 1.17      | 0.93             | 1.79             | 0.22            |
| C <sub>15</sub>                         | 1.26    | 0.82             | 1.97             | 0.25            | 1.11      | 0.77             | 1.60             | 0.23            |
| C <sub>16</sub>                         | 0.35    | 0.00             | 0.88             | 0.27            | 0.32      | 0.00             | 0.96             | 0.28            |
| C <sub>17</sub>                         | 1.04    | 0.37             | 2.41             | 0.45            | 0.99      | 0.39             | 1.99             | 0.34            |
| C <sub>18</sub>                         | 1.11    | 0.32             | 2.66             | 0.48            | 1.22      | 0.58             | 2.78             | 0.48            |
| C <sub>19</sub>                         | 2.50    | 1.17             | 5.69             | 1.11            | 2.65      | 1.05             | 7.30             | 1.42            |
| C <sub>20</sub>                         | 3.79    | 1.09             | 7.99             | 1.60            | 4.64      | 1.01             | 15.5             | 2.76            |
| C <sub>21</sub>                         | 6.28    | 3.30             | 12.9             | 2.26            | 8.31      | 2.50             | 25.7             | 4.75            |
| C <sub>22</sub>                         | 10.1    | 5.02             | 27.5             | 4.31            | 14.0      | 2.77             | 33.7             | 7.53            |
| C <sub>23</sub>                         | 13.0    | 6.10             | 38.5             | 6.08            | 17.1      | 3.22             | 44.6             | 8.86            |
| C <sub>24</sub>                         | 12.6    | 6.59             | 36.0             | 6.03            | 16.9      | 2.94             | 46.1             | 8.27            |
| C <sub>25</sub>                         | 12.7    | 5.57             | 36.4             | 6.39            | 16.4      | 2.60             | 44.6             | 8.21            |
| C <sub>26</sub>                         | 11.3    | 4.97             | 28.9             | 5.77            | 15.3      | 3.43             | 34.9             | 6.62            |
| C <sub>27</sub>                         | 12.3    | 5.25             | 33.7             | 6.19            | 15.6      | 2.97             | 32.9             | 6.65            |
| C <sub>28</sub>                         | 9.19    | 4.80             | 29.3             | 5.01            | 11.9      | 3.14             | 24.2             | 4.74            |
| C <sub>29</sub>                         | 14.0    | 5.76             | 44.9             | 8.00            | 17.9      | 3.05             | 43.5             | 8.27            |
| C <sub>30</sub>                         | 8.03    | 4.36             | 25.9             | 4.51            | 10.8      | 3.20             | 21.8             | 4.06            |
| C <sub>31</sub>                         | 10.9    | 4.80             | 35.9             | 6.06            | 13.7      | 4.01             | 35.6             | 6.15            |
| C <sub>32</sub>                         | 5.56    | 3.09             | 14.9             | 2.28            | 6.87      | 4.18             | 13.1             | 1.98            |
| C <sub>33</sub>                         | 6.48    | 4.01             | 18.5             | 2.79            | 7.55      | 3.55             | 18.5             | 2.87            |
| C <sub>34</sub>                         | 4.80    | 3.57             | 9.94             | 1.36            | 5.56      | 4.04             | 10.2             | 1.40            |
| C <sub>35</sub>                         | 4.73    | 3.61             | 9.29             | 1.20            | 5.06      | 3.80             | 9.37             | 1.15            |
| C <sub>36</sub>                         | 4.77    | 4.10             | 8.02             | 0.91            | 4.61      | 3.95             | 6.78             | 0.57            |
| C <sub>37</sub>                         | 5.00    | 4.35             | 8.80             | 0.80            | 4.76      | 4.35             | 5.97             | 0.35            |
| C <sub>38</sub>                         | 5.35    | 4.67             | 9.46             | 0.85            | 5.01      | 4.75             | 5.53             | 0.20            |
| C <sub>39</sub>                         | 6.71    | 5.89             | 11.6             | 1.04            | 6.41      | 5.64             | 7.79             | 0.53            |
| Subtotal                                | 177     | 96.1             | 467              | 76.6            | 218       | 74.4             | 500              | 89.3            |
| CPI (C <sub>20</sub> -C <sub>39</sub> ) | 1.28    | 1.18             | 1.32             | 1.32            | 1.24      | 1.10             | 1.37             | 1.35            |
| Plant Wax Alkanes                       |         |                  |                  |                 |           |                  |                  |                 |
| C <sub>23</sub>                         | 1.64    | 0.30             | 6.72             | 1.19            | 1.80      | 0.00             | 4.98             | 1.56            |
| C <sub>25</sub>                         | 0.81    | 0.00             | 3.93             | 0.82            | 0.76      | 0.00             | 4.13             | 1.07            |
| C <sub>27</sub>                         | 2.02    | 0.00             | 5.28             | 1.18            | 2.00      | 0.00             | 5.69             | 1.65            |
| C <sub>29</sub>                         | 5.42    | 0.47             | 17.4             | 3.58            | 6.55      | 0.00             | 20.5             | 4.47            |
| C <sub>31</sub>                         | 4.08    | 0.25             | 15.5             | 2.87            | 4.82      | 0.00             | 18.2             | 3.54            |
| C <sub>33</sub>                         | 1.30    | 0.10             | 6.05             | 1.15            | 1.36      | 0.00             | 6.85             | 1.38            |
| C <sub>35</sub>                         | 0.16    | 0.00             | 0.86             | 0.26            | 0.22      | 0.00             | 1.04             | 0.33            |
| C <sub>37</sub>                         | 0.10    | 0.00             | 0.53             | 0.17            | 0.10      | 0.00             | 0.74             | 0.19            |
| Subtotal                                | 15.5    | 1.12             | 56.2             | 11.2            | 17.6      | 0                | 62.1             | 14.2            |

36

37

38 **Table 1. (Continued)**

| Compounds                                   | Daytime |                  |                  |                 | Nighttime |                  |                  |                 |
|---------------------------------------------|---------|------------------|------------------|-----------------|-----------|------------------|------------------|-----------------|
|                                             | Mean    | Min <sup>a</sup> | Max <sup>b</sup> | SD <sup>c</sup> | Mean      | Min <sup>a</sup> | Max <sup>b</sup> | SD <sup>c</sup> |
| Fatty acids                                 |         |                  |                  |                 |           |                  |                  |                 |
| C <sub>12:0</sub>                           | 0.54    | 0.12             | 2.04             | 0.44            | 0.60      | 0.19             | 1.57             | 0.31            |
| C <sub>13:0</sub>                           | 0.55    | 0.11             | 2.08             | 0.40            | 0.74      | 0.03             | 2.38             | 0.57            |
| C <sub>14:0</sub>                           | 0.81    | 0.27             | 2.48             | 0.39            | 1.05      | 0.21             | 1.87             | 0.40            |
| C <sub>15:0</sub>                           | 0.61    | 0.19             | 1.88             | 0.34            | 0.69      | 0.05             | 1.50             | 0.29            |
| C <sub>16:0</sub>                           | 18.9    | 5.12             | 56.8             | 11.2            | 30.5      | 3.87             | 89.2             | 20.9            |
| C <sub>17:0</sub>                           | 0.60    | 0.18             | 1.99             | 0.37            | 0.77      | 0.11             | 1.80             | 0.36            |
| C <sub>18:0</sub>                           | 7.46    | 1.88             | 23.4             | 4.11            | 12.2      | 1.48             | 28.9             | 7.16            |
| C <sub>19:0</sub>                           | 0.36    | 0.08             | 1.07             | 0.23            | 0.48      | 0.02             | 1.41             | 0.30            |
| C <sub>20:0</sub>                           | 1.40    | 0.38             | 5.06             | 0.92            | 1.78      | 0.18             | 4.19             | 0.92            |
| C <sub>21:0</sub>                           | 0.81    | 0.14             | 2.87             | 0.57            | 0.96      | 0.03             | 2.32             | 0.55            |
| C <sub>22:0</sub>                           | 2.70    | 0.57             | 10.4             | 1.90            | 3.16      | 0.17             | 7.51             | 1.85            |
| C <sub>23:0</sub>                           | 1.94    | 0.43             | 8.47             | 1.55            | 2.38      | 0.10             | 5.41             | 1.34            |
| C <sub>24:0</sub>                           | 16.8    | 3.28             | 73.8             | 13.5            | 19.4      | 1.51             | 50.9             | 11.7            |
| C <sub>25:0</sub>                           | 1.11    | 0.16             | 4.34             | 0.82            | 1.37      | 0.00             | 3.45             | 0.85            |
| C <sub>26:0</sub>                           | 2.75    | 0.37             | 10.6             | 2.08            | 3.22      | 0.10             | 9.07             | 2.09            |
| C <sub>27:0</sub>                           | 0.62    | 0.09             | 1.94             | 0.46            | 0.74      | 0.00             | 2.07             | 0.54            |
| C <sub>28:0</sub>                           | 2.27    | 0.38             | 10.3             | 1.95            | 2.86      | 0.23             | 6.88             | 1.81            |
| C <sub>29:0</sub>                           | 0.63    | 0.09             | 2.88             | 0.56            | 0.79      | 0.00             | 2.10             | 0.49            |
| C <sub>30:0</sub>                           | 2.35    | 0.34             | 12.6             | 2.32            | 2.99      | 0.17             | 9.40             | 2.14            |
| C <sub>31:0</sub>                           | 0.26    | 0.00             | 1.38             | 0.25            | 0.35      | 0.05             | 1.17             | 0.28            |
| C <sub>32:0</sub>                           | 1.13    | 0.00             | 7.48             | 1.44            | 1.55      | 0.07             | 6.04             | 1.35            |
| C <sub>18:1</sub>                           | 0.36    | 0.04             | 1.62             | 0.33            | 0.39      | 0.00             | 1.66             | 0.37            |
| C <sub>18:2</sub>                           | 1.81    | 0.10             | 8.18             | 1.80            | 2.31      | 0.00             | 10.9             | 2.58            |
| Subtotal                                    | 66.8    | 14.3             | 254              | 47.9            | 91.3      | 8.57             | 252              | 59.2            |
| CPI (C <sub>20:0</sub> -C <sub>32:0</sub> ) | 5.41    | 4.24             | 6.50             | 0.54            | 5.52      | 4.29             | 13.2             | 1.51            |
| Fatty alcohols                              |         |                  |                  |                 |           |                  |                  |                 |
| C <sub>12</sub>                             | 1.74    | 0.26             | 5.76             | 1.12            | 1.99      | 0.16             | 7.33             | 1.38            |
| C <sub>14</sub>                             | 3.58    | 0.70             | 23.9             | 4.11            | 4.13      | 0.10             | 11.6             | 2.60            |
| C <sub>15</sub>                             | 0.60    | 0.22             | 1.81             | 0.39            | 0.66      | 0.05             | 1.33             | 0.38            |
| C <sub>16</sub>                             | 0.66    | 0.16             | 1.60             | 0.34            | 0.71      | 0.05             | 2.32             | 0.45            |
| C <sub>17</sub>                             | 0.42    | 0.10             | 1.30             | 0.26            | 0.46      | 0.13             | 1.98             | 0.34            |
| C <sub>18</sub>                             | 0.91    | 0.19             | 2.33             | 0.57            | 1.43      | 0.13             | 6.35             | 1.25            |
| C <sub>19</sub>                             | 0.54    | 0.15             | 2.09             | 0.35            | 0.56      | 0.15             | 1.34             | 0.30            |
| C <sub>20</sub>                             | 1.08    | 0.18             | 2.71             | 0.66            | 1.11      | 0.27             | 3.06             | 0.63            |
| C <sub>21</sub>                             | 0.74    | 0.15             | 2.98             | 0.56            | 0.75      | 0.12             | 2.12             | 0.45            |
| C <sub>22</sub>                             | 1.76    | 0.47             | 6.37             | 1.26            | 2.11      | 0.13             | 6.92             | 1.44            |
| C <sub>23</sub>                             | 0.68    | 0.14             | 1.97             | 0.43            | 0.92      | 0.23             | 2.92             | 0.60            |
| C <sub>24</sub>                             | 1.22    | 0.19             | 7.86             | 1.31            | 1.28      | 0.16             | 3.50             | 0.77            |
| C <sub>25</sub>                             | 0.64    | 0.21             | 1.94             | 0.35            | 0.55      | 0.11             | 1.26             | 0.27            |
| C <sub>26</sub>                             | 2.99    | 0.18             | 10.7             | 2.03            | 3.34      | 0.68             | 7.77             | 1.93            |
| C <sub>27</sub>                             | 0.83    | 0.19             | 2.27             | 0.48            | 0.87      | 0.00             | 3.74             | 0.70            |
| C <sub>28</sub>                             | 5.72    | 1.17             | 19.3             | 3.69            | 6.44      | 1.09             | 18.7             | 3.62            |

40 **Table 1. (continued)**

| Compounds                               | Daytime |                  |                  |                 | Nighttime |                  |                  |                 |
|-----------------------------------------|---------|------------------|------------------|-----------------|-----------|------------------|------------------|-----------------|
|                                         | Mean    | Min <sup>a</sup> | Max <sup>b</sup> | SD <sup>c</sup> | Mean      | Min <sup>a</sup> | Max <sup>b</sup> | SD <sup>c</sup> |
| C <sub>29</sub>                         | 0.97    | 0.16             | 5.20             | 0.90            | 0.94      | 0.00             | 2.38             | 0.55            |
| C <sub>30</sub>                         | 8.73    | 1.87             | 51.7             | 8.66            | 11.6      | 0.87             | 32.6             | 6.36            |
| C <sub>31</sub>                         | 0.67    | 0.00             | 2.46             | 0.47            | 0.78      | 0.00             | 2.86             | 0.51            |
| C <sub>32</sub>                         | 2.39    | 0.61             | 10.4             | 1.91            | 3.14      | 0.18             | 9.29             | 2.15            |
| Subtotal                                | 36.9    | 7.30             | 165              | 29.9            | 43.8      | 4.61             | 129              | 26.7            |
| CPI (C <sub>20</sub> -C <sub>32</sub> ) | 5.22    | 2.56             | 10.3             | 1.67            | 6.32      | 3.06             | 15.5             | 2.45            |
| Anhydro-sugars                          |         |                  |                  |                 |           |                  |                  |                 |
| Galactosan                              | 2.26    | 0.65             | 7.47             | 1.36            | 3.13      | 0.48             | 7.75             | 2.07            |
| Mannosan                                | 1.62    | 0.36             | 4.30             | 0.93            | 2.06      | 0.27             | 5.73             | 1.36            |
| Levoglucoosan                           | 38.4    | 4.79             | 179              | 38.6            | 66.0      | 4.96             | 354              | 76.7            |
| Subtotal                                | 42.3    | 5.8              | 191              | 40.9            | 71.2      | 5.71             | 367              | 80.1            |
| Sugars                                  |         |                  |                  |                 |           |                  |                  |                 |
| Erythritol                              | 0.24    | 0.04             | 0.64             | 0.13            | 0.27      | 0.02             | 0.58             | 0.15            |
| Mannitol                                | 0.30    | 0.09             | 0.91             | 0.17            | 0.30      | 0.07             | 0.70             | 0.14            |
| Inositol                                | 0.18    | 0.05             | 0.40             | 0.07            | 0.20      | 0.05             | 0.43             | 0.10            |
| Arabitol                                | 0.43    | 0.08             | 1.20             | 0.21            | 0.50      | 0.04             | 1.10             | 0.26            |
| Fructose                                | 0.69    | 0.15             | 1.45             | 0.36            | 0.60      | 0.11             | 1.50             | 0.32            |
| Glucose                                 | 1.14    | 0.27             | 2.77             | 0.51            | 1.16      | 0.20             | 2.86             | 0.58            |
| Sucrose                                 | 0.25    | 0.05             | 0.71             | 0.15            | 0.23      | 0.06             | 0.87             | 0.17            |
| Trehalose                               | 0.21    | 0.05             | 0.81             | 0.15            | 0.17      | 0.04             | 0.45             | 0.09            |
| Subtotal                                | 3.44    | 0.78             | 8.89             | 1.75            | 3.43      | 0.59             | 8.49             | 1.81            |
| Phthalate esters                        |         |                  |                  |                 |           |                  |                  |                 |
| Diethyl (DEP)                           | 0.14    | 0.03             | 0.57             | 0.12            | 0.15      | 0.03             | 0.50             | 0.11            |
| Diisobutyl (DiBP)                       | 2.56    | 0.59             | 8.54             | 2.03            | 2.72      | 0.63             | 7.19             | 1.67            |
| Di-n-butyl (DnBP)                       | 8.18    | 1.30             | 20.0             | 5.52            | 8.12      | 2.08             | 22.8             | 5.04            |
| Di-(2-ethylhexyl) (DEHP)                | 3.00    | 0.74             | 10.9             | 2.38            | 5.32      | 1.06             | 21.3             | 4.24            |
| Subtotal                                | 13.9    | 2.66             | 40.0             | 10.1            | 16.3      | 3.80             | 51.8             | 11.1            |
| Glycerol and Polyacids                  |         |                  |                  |                 |           |                  |                  |                 |
| Glycerol                                | 2.67    | 0.66             | 5.99             | 1.63            | 3.50      | 0.73             | 8.72             | 2.36            |
| Glyceric acid                           | 1.59    | 0.28             | 8.34             | 1.58            | 1.68      | 0.34             | 4.30             | 1.09            |
| Malic acid                              | 1.09    | 0.07             | 4.66             | 1.12            | 1.19      | 0.36             | 3.35             | 0.81            |
| Tartaric acid                           | 1.93    | 0.51             | 8.57             | 1.44            | 2.57      | 1.02             | 5.74             | 1.31            |
| Citric acid                             | 0.50    | 0.07             | 2.15             | 0.40            | 0.36      | 0.09             | 0.98             | 0.22            |
| Subtotal                                | 7.78    | 1.59             | 29.7             | 6.17            | 9.30      | 2.54             | 23.1             | 5.79            |
| Aromatic acids                          |         |                  |                  |                 |           |                  |                  |                 |
| Benzoic acid                            | 0.45    | 0.17             | 0.95             | 0.18            | 0.54      | 0.24             | 1.22             | 0.21            |
| Phthalic acid                           | 0.68    | 0.24             | 1.24             | 0.30            | 0.65      | 0.28             | 1.80             | 0.37            |
| Isophthalic acid                        | 0.13    | 0.03             | 0.33             | 0.08            | 0.14      | 0.05             | 0.40             | 0.10            |
| Terephthalic acid                       | 5.44    | 1.09             | 20.6             | 4.13            | 7.04      | 1.42             | 15.0             | 4.15            |
| Subtotal                                | 6.70    | 1.53             | 23.1             | 4.69            | 8.37      | 1.99             | 18.4             | 4.83            |

42 **Table 1. (Continued)**

| Compounds                                     | Daytime |                  |                  |                 | Nighttime |                  |                  |                 |
|-----------------------------------------------|---------|------------------|------------------|-----------------|-----------|------------------|------------------|-----------------|
|                                               | Mean    | Min <sup>a</sup> | Max <sup>b</sup> | SD <sup>c</sup> | Mean      | Min <sup>a</sup> | Max <sup>b</sup> | SD <sup>c</sup> |
| Lignin and Resin products                     |         |                  |                  |                 |           |                  |                  |                 |
| 4-Hydroxybenzoic acid                         | 1.80    | 0.65             | 4.31             | 0.79            | 2.01      | 0.62             | 4.96             | 1.02            |
| Vanillic acid                                 | 0.25    | 0.04             | 0.92             | 0.15            | 0.25      | 0.08             | 0.66             | 0.12            |
| Syringic acid                                 | 0.17    | 0.04             | 0.57             | 0.09            | 0.20      | 0.05             | 0.43             | 0.09            |
| Dehydroabietic acid                           | 0.46    | 0.11             | 1.16             | 0.26            | 0.93      | 0.00             | 8.29             | 1.47            |
| Subtotal                                      | 2.68    | 0.84             | 6.96             | 1.29            | 3.39      | 0.75             | 14.3             | 2.70            |
| PAHs                                          |         |                  |                  |                 |           |                  |                  |                 |
| Napthalene (Nap)                              | 0.52    | 0.45             | 0.80             | 0.07            | 0.51      | 0.41             | 0.60             | 0.05            |
| Acenaphthylene (Acnl)                         | 2.01    | 1.80             | 3.47             | 0.28            | 1.95      | 1.66             | 2.17             | 0.10            |
| Acenaphthene (Ace)                            | 0.64    | 0.56             | 1.22             | 0.11            | 0.61      | 0.55             | 0.69             | 0.04            |
| Fluorene (Flu)                                | 1.00    | 0.83             | 1.70             | 0.14            | 0.94      | 0.85             | 1.05             | 0.05            |
| Phenanthrene (Phe)                            | 1.95    | 0.68             | 4.52             | 0.96            | 2.03      | 0.33             | 4.62             | 1.17            |
| Anthracene (Ant)                              | 1.38    | 1.11             | 4.21             | 0.56            | 1.30      | 1.00             | 2.02             | 0.23            |
| Fluoranthene (Flut)                           | 7.21    | 3.01             | 18.2             | 3.19            | 9.34      | 2.14             | 27.6             | 5.33            |
| Pyrene (Pyr)                                  | 5.33    | 2.15             | 11.4             | 2.15            | 7.59      | 1.32             | 26.8             | 4.78            |
| Benzo[a]anthracene (BaA)                      | 3.98    | 2.37             | 6.44             | 1.07            | 6.14      | 1.87             | 14.8             | 3.54            |
| Chrysene (Chry)                               | 5.31    | 2.50             | 9.11             | 1.78            | 7.70      | 1.24             | 17.0             | 4.11            |
| Benzo[b]fluoranthene (BbF)                    | 4.88    | 2.42             | 8.40             | 1.52            | 6.88      | 1.51             | 14.4             | 3.57            |
| Benzo[k]fluoranthene (BkF)                    | 2.47    | 0.94             | 4.28             | 0.80            | 3.39      | 0.84             | 7.19             | 1.56            |
| Benzo[e]pyrene (BeP)                          | 3.08    | 1.39             | 6.01             | 1.18            | 4.71      | 0.68             | 11.6             | 2.84            |
| Benzo[a]pyrene (BaP)                          | 3.46    | 1.86             | 6.35             | 1.08            | 5.23      | 1.31             | 13.1             | 2.88            |
| Indeno[1,2,3-cd]pyrene (IP)                   | 4.52    | 2.85             | 8.01             | 1.24            | 6.50      | 2.11             | 24.5             | 4.21            |
| Benzo[ghi]perylene (BghiP)                    | 3.66    | 1.91             | 6.93             | 1.22            | 5.85      | 1.40             | 26.1             | 4.64            |
| Dibenzo[a,h]anthracene (DahA)                 | 3.08    | 2.70             | 5.19             | 0.46            | 4.11      | 2.49             | 28.7             | 4.68            |
| Subtotal                                      | 54.5    | 29.5             | 106              | 17.8            | 74.8      | 21.7             | 223              | 43.8            |
| Hopanes                                       |         |                  |                  |                 |           |                  |                  |                 |
| 17 $\alpha$ (H)-22,29,30-Trisnorhopane        | 0.23    | 0.00             | 1.51             | 0.28            | 0.43      | 0.03             | 1.46             | 0.35            |
| 17 $\alpha$ (H)-21 $\beta$ (H)-30-Norhopane   | 0.53    | 0.03             | 2.65             | 0.50            | 0.64      | 0.03             | 3.39             | 0.65            |
| 17 $\alpha$ (H)-21 $\beta$ (H)-Hopane         | 1.18    | 0.02             | 8.91             | 1.54            | 1.71      | 0.07             | 8.88             | 1.73            |
| 17 $\beta$ (H)-21 $\alpha$ (H)-Hopane         | 0.22    | 0.01             | 1.12             | 0.25            | 0.26      | 0.00             | 0.93             | 0.27            |
| 17 $\alpha$ (H)-21 $\beta$ (H)-22S-Homohopane | 0.58    | 0.00             | 2.07             | 0.53            | 0.90      | 0.00             | 3.94             | 0.95            |
| 17 $\alpha$ (H)-21 $\beta$ (H)-22R-Homohopane | 1.05    | 0.01             | 4.58             | 1.05            | 0.70      | 0.00             | 7.52             | 1.36            |
| Subtotal                                      | 3.79    | 0.07             | 20.8             | 4.15            | 4.64      | 0.13             | 26.1             | 5.31            |
| Steranes                                      |         |                  |                  |                 |           |                  |                  |                 |
| $\alpha\alpha\alpha$ 20S-Cholestane           | 0.41    | 0.19             | 1.64             | 0.31            | 0.42      | 0.18             | 1.42             | 0.25            |
| $\alpha\beta\beta$ 20R-Cholestane             | 0.36    | 0.18             | 1.74             | 0.27            | 0.40      | 0.17             | 1.43             | 0.25            |
| $\alpha\alpha\alpha$ 20R-Cholestane           | 0.38    | 0.18             | 1.98             | 0.33            | 0.42      | 0.18             | 2.01             | 0.35            |
| $\alpha\beta\beta$ 20R, 24S-Methylcholestane  | 0.35    | 0.19             | 1.13             | 0.19            | 0.36      | 0.16             | 1.25             | 0.22            |
| $\alpha\beta\beta$ 20R, 24R-Ethylcholestane   | 0.44    | 0.22             | 1.06             | 0.19            | 0.55      | 0.23             | 2.34             | 0.38            |
| $\alpha\alpha\alpha$ 20R, 24R-Ethylcholestane | 0.35    | 0.17             | 1.60             | 0.27            | 0.50      | 0.16             | 2.65             | 0.47            |
| Subtotal                                      | 2.29    | 1.13             | 9.15             | 1.56            | 2.65      | 1.08             | 11.1             | 1.92            |

<sup>a</sup>Minimum, <sup>b</sup>Maximum, <sup>c</sup>Standard deviation

CPI: carbon preference index:  $(C_{21}+C_{23}+C_{25}+C_{27}+C_{29}+C_{31}+C_{33}+C_{35}+C_{37}+C_{39})/(C_{20}+C_{22}+C_{24}+C_{26}+C_{28}+C_{30}+C_{32}+C_{34}+C_{36}+C_{38})$  for n-alkanes;  $(C_{20}+C_{22}+C_{24}+C_{26}+C_{28}+C_{30}+C_{32})/(C_{21}+C_{23}+C_{25}+C_{27}+C_{29}+C_{31})$  for fatty acids;  $(C_{20}+C_{22}+C_{24}+C_{26}+C_{28}+C_{30}+C_{32})/(C_{21}+C_{23}+C_{25}+C_{27}+C_{29}+C_{31})$  for fatty alcohols.

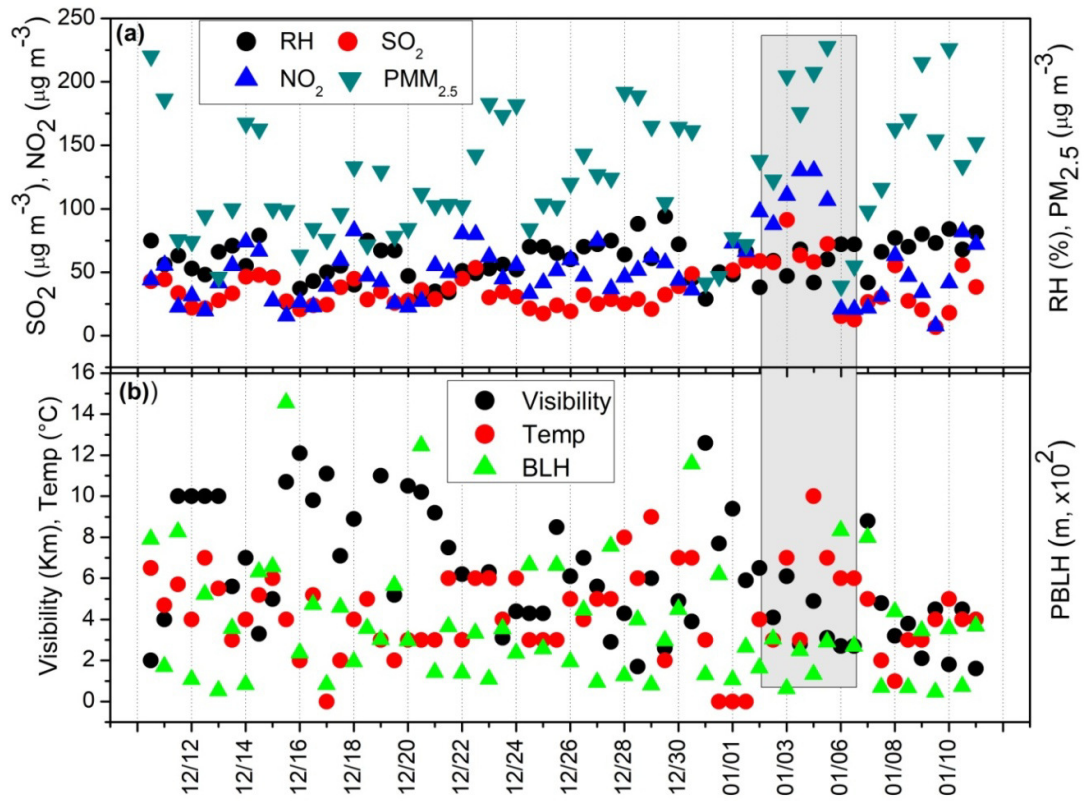

44

45 **Figure S1.** Diurnal variations of (a) SO<sub>2</sub>, NO<sub>2</sub>, Relative Humidity (RH), and PM<sub>2.5</sub> (b)  
 46 Visibility, Temperature (Temp) and Planetary Boundary Layer Height (PBLH) in Nanjing  
 47 aerosols during study period.  
 48  
 49  
 50  
 51  
 52  
 53

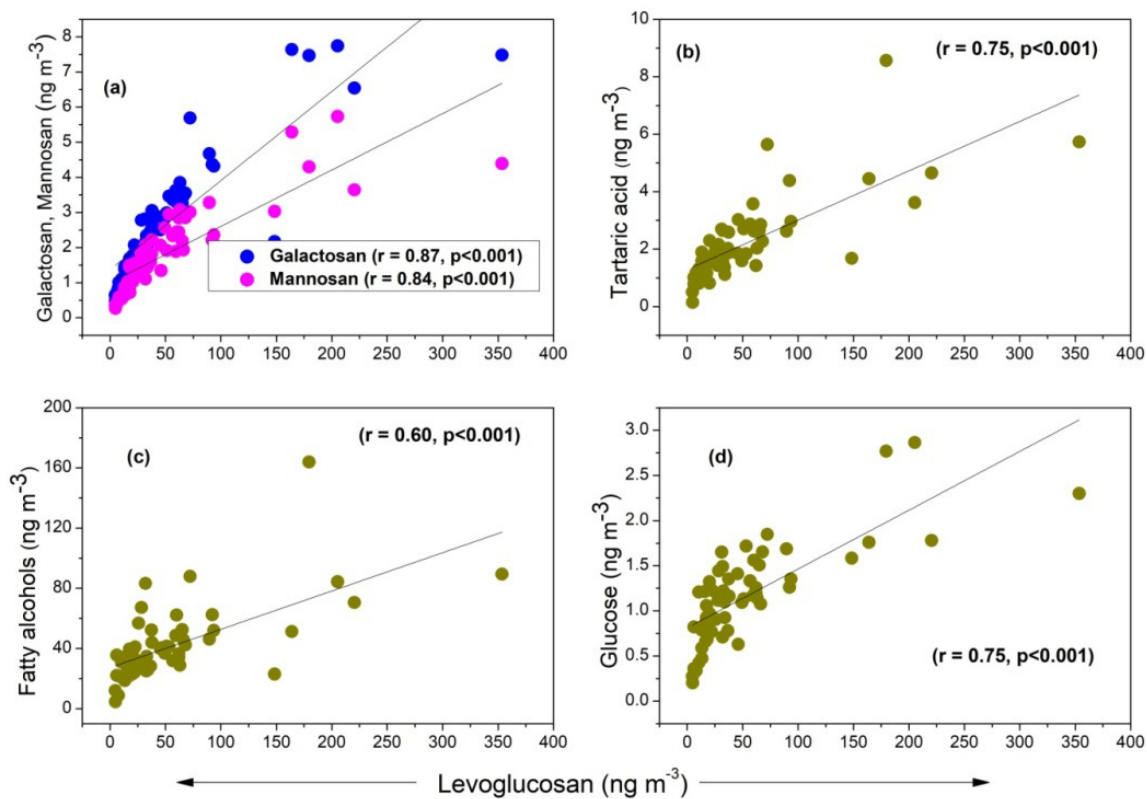

54

55 **Figure S2.** Correlation coefficients of levoglucosan with galactosan, mannosan, glucose, tartaric acid  
 56 and fatty alcohols in urban aerosols in Nanjing.

57

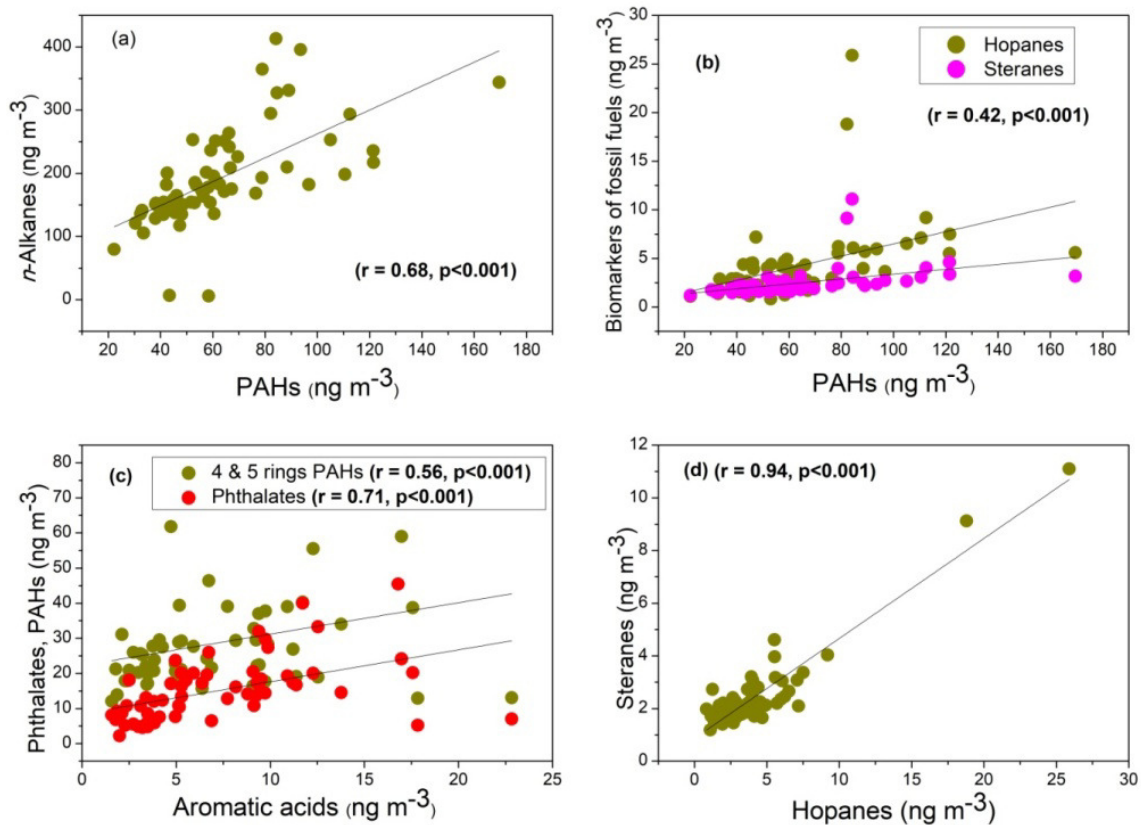

58

59 **Figure S3.** Correlations between the concentrations of (a) PAHs and  $n$ -alkanes (b) PAHs and  
 60 hopanes/steranes (c) aromatic acids and phthalates/PAHs (d) hopanes and steranes.

61



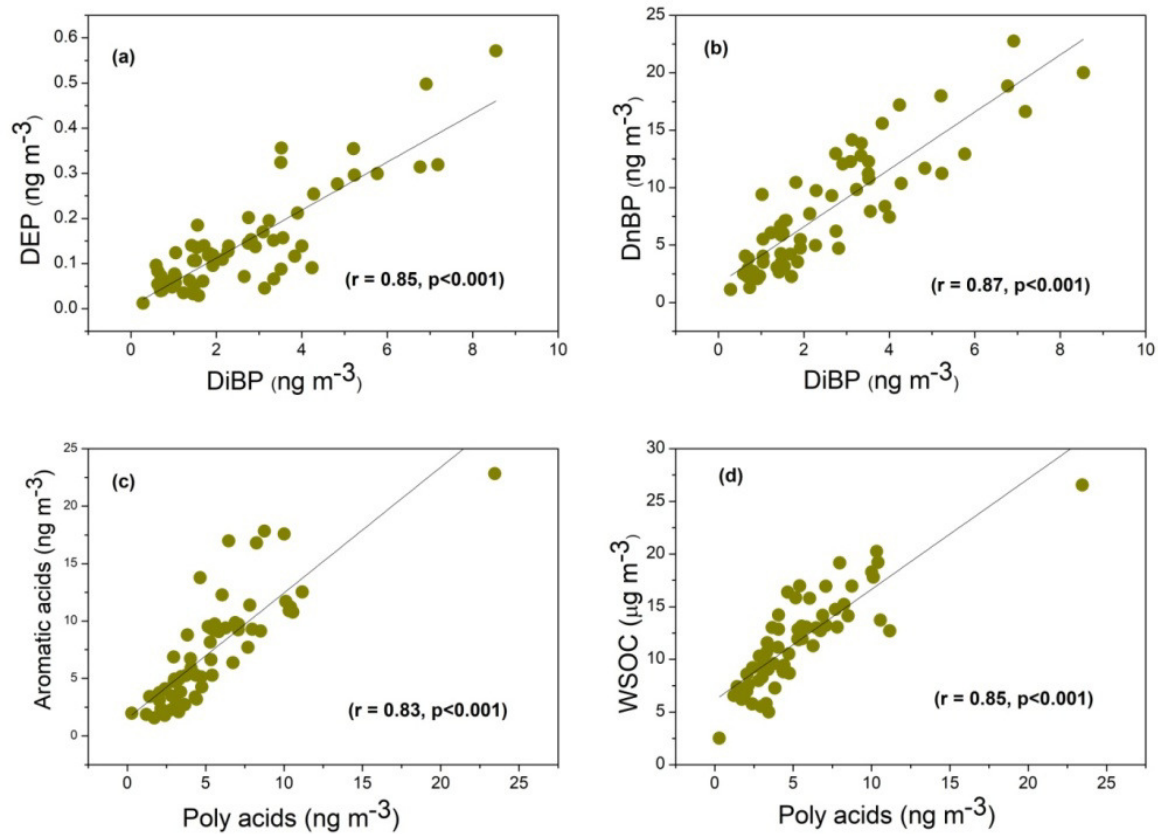

62

63 **Figure S4.** Relationships between the concentrations of (a) DiBP (di-iso-butyl phthalate) and DEP  
 64 (diethyl phthalate) (b) DiBP (di-iso-butyl phthalate) and DnBP (di-n-butyl phthalate) (c) poly acids  
 65 and aromatic acids (d) poly acids and WSOC.

66
