# Supplementary material for: Characterization of organic aerosols from a Chinese Mega-City during winter: predominance of fossil fuel combustion
Source: Copernicus journal article supplement (doi:10.5194/acp-2018-969), 2018-10-22
Supplement: Supplementary file [file acp-2018-969-AC1-supplement.pdf]

## **Responses to the Anonymous Referee-1 comments**

### **Referee #1 Evaluations:**

The comments on “Characterization of organic aerosols from a Chinese Mega-City during winter: predominance of fossil fuel combustion” submitted by Haque et al. In this study, PM<sub>2.5</sub> samples were collected from an urban site in Nanjing, a big city in East China. A comprehensive laboratory analysis was conducted for various organic compounds. Based on the characteristics of different organic compounds, and also the PMF receptor model, the sources of organic aerosols were identified. General speaking, this work has value for the mitigation of the serious air pollution in China. However, this paper suffers some major problems, regarding the writing and organization.

**Response:** We thank the reviewer for the nice summary of our paper and the positive assessment of this work. We have carefully revised the manuscript following the reviewer’s comments and suggestions. Our responses to all comments made by the reviewer are given below. Please refer to the revised MS, in which changes are highlighted in yellow.

### **Specific comments:**

1. Line 55-60, I do agree that organic aerosols are important in the climate system, as CCN. However, I can not understand why the authors use another whole paragraph (Line 78-95) to describe this issue repeatedly and in such detailed way. Actually, for the urban sites, the aerosol is more closely related to the pollution (environmental) issue, rather than climate issue. Obviously, the role of organic aerosols in the climate is not the focus of this study.

**Response:** Considering the reviewer’s comment, we removed the paragraph and revised this section. Please see lines 55-57 and 70-72 in the revised MS.

2. Line 100-101, the references cited here seem too old. In the recent years, many research was conducted in terms of inorganic aerosols like sulfate and nitrate from anthropogenic emissions, rather than desert dust.

**Response:** Following the reviewer’s suggestions, we have cited recently published papers. Please see lines 91-94 in the revised MS.

3. Line 105-108, what is the current status of air quality in Nanjing? What is the concentration level of PM<sub>2.5</sub> during the sampling time? Updated information and reference should be presented here. Also, the China national standard of air quality or WHO standard should be used here.

**Response:** The average concentrations of PM<sub>2.5</sub> were  $66 \pm 33 \mu\text{g m}^{-3}$  in Nanjing aerosols during sampling period, whereas the Chinese Ambient Air Quality and WHO standard levels are  $35 \mu\text{g m}^{-3}$  and  $25 \mu\text{g m}^{-3}$ , respectively (Liu et al., 2016; Shen et al., 2014), indicating that Nanjing air quality is still worse compared to China national and WHO standard levels. Please see lines 100-104 in the revised MS.

4. Line 111, Why winter season was selected for the sampling? What is the special characteristics of winter compared to other seasons?

**Response:** The highest PM<sub>2.5</sub> concentrations were observed during winter in China due to the enhancement of anthropogenic emissions from fossil fuel combustion and biomass burning and unfavorable meteorological conditions, i.e., frequent development of inversion layers

(Zhang et al., 2015). Ma et al. (2016) also reported PM<sub>2.5</sub> concentrations from 2004-2013 in China while winter was the most polluted season. Please see lines 105-109 in the revised MS.

5. In the Experimental section, major ions should be included. Because ions data were used in this study, especially in the PMF analysis, soil dust (indicated by Ca<sup>2+</sup>) was identified as the Factor 2.

**Response:** Following the reviewer's recommendations, we included the analysis of major ions in the experimental section. Please see lines 197-209 in the revised MS.

6. Line 245, it was written as "The OC/EC ratio in this study was on average 2.40, suggesting the significant contribution of SOA in Nanjing aerosols". Actually, there are other possible causes. First, as the OC/EC ratio of coal combustion is 2.7, which was proposed by Watson 2001 (Line 236), so only coal combustion rather than secondary formation could produce the ratio of 2.4 here. I do not think the ratio is high. Maybe sometime the ratio for vehicular emission is low, but when it was mixed by biomass-burning emission (as discussed latter), the ratio also could increase somewhat.

**Response:** We agree with reviewer's opinion. Based on the OC/EC ratio, we made conclusion that fossil fuel combustion is the major source of carbonaceous aerosols in Nanjing (please see lines 254-255 in the revised MS). However, SOA may also be important in Nanjing aerosols, which was discussed based on the air mass trajectories, WSOC/OC ratio and source contribution. Please see lines 256-268 in the revised MS.

7. Line 277-278, some sentence seem missing here. What is the situation found in this study?

**Response:** We have removed these lines because we have used CPI values for the source indicator either it is fossil fuels or biogenic. Please see lines 292-302 in the revised MS.

8. Line 346-350. The amount of galactosan was found to be 0.65-7.47 ng m<sup>-3</sup> (ave. 2.26 ng m<sup>-3</sup>) during daytime and 0.48-7.75 ng m<sup>-3</sup> (3.13 ng m<sup>-3</sup>) during nighttime, whereas those of mannosan were 0.36-4.30 ng m<sup>-3</sup> (1.62 -349 Ång m<sup>-3</sup>) in daytime and 0.27-5.73 ng m<sup>-3</sup> (2.06 ng m<sup>-3</sup>) in nighttime. Galactosan and mannosan were also detected in the aerosol samples. Please check the logic among these sentences.

**Response:** We have restructured these lines. Please see lines 359-363 in the revised MS.

9. Line 422, why the coal combustion should be higher in nighttime? Any references or supporting information?

**Response:** Households coal combustion has a significant contribution to ambient air quality in China during winter (Kerimray et al., 2017). Temperature falls down during nighttime resulting in the uses of a large amount of coal for house heating in a rural area due to the cold weather. Based on the reviewer's comments, we have included these points in the revised MS. Please see lines 432-435 in the revised MS.

10. Line 428-430, I suggest to delete these sentence here. Because the sources of PAHs were discussed more detailed in the below (Line 442-453) using the PAHs ratios.

**Response:** Deleted.

11. Does the dataset (data amount) meet the requirement of PMF?

**Response:** Yes, the dataset meets the requirement of PMF. There is no specific number of samples for PMF analysis (Hopke et al., 2010). However, a large number of samples can give less uncertainty and stable PMF results. PMF source apportionment relies on source specific

species to explore ambient pollution sources. In this study, we observed distinguishably different source profiles using PMF analyses.

12. Sometime, the authors attribute the source of pollutants to long-range transport (e.g. Line 650). Actually, most of emission information provided in the text is the local emission pattern, like local truck.

**Response:** We found higher concentrations of secondary oxidation products in nighttime rather than daytime when photochemical oxidation was absent. We have proposed two explanations for the higher concentrations of SOA products during nighttime. First, SOA products might be formed during long-range atmospheric transport that is consistent with aged PAHs and high OC/EC and WSOC/OC ratios in the Nanjing aerosols (please see lines 256-268, 442-452 in the revised MS). The back trajectories also indicate long-range transport while some air masses come from the polluted regions over North China (please see below figure). Second, NO<sub>x</sub> can play an important role to form SOA products in nighttime when NO<sub>x</sub> concentration is high. Please see lines 561-573, 598-601, and 660-662 in the revised MS.

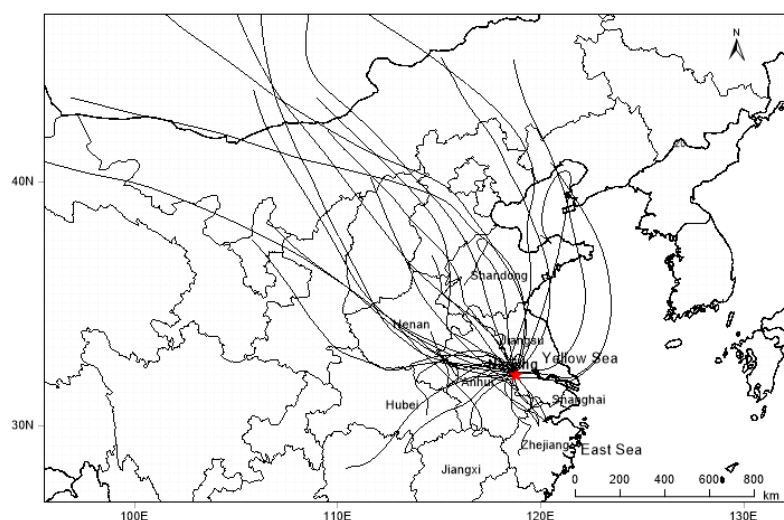

**Figure:** 48 hrs backward air mass trajectories arriving at 500 m above the ground level to Nanjing, China during 11 Dec 2014–11 Jan 2015.

## References

- Chang, Y., Zhang, Y., Tian, C., Zhang, S., Ma, X., Cao, F., Liu, X., Zhang, W., Kuhn, T., and Lehmann, M. F.: Nitrogen isotope fractionation during gas-particle conversion of NO<sub>x</sub> to NO<sub>3</sub><sup>-</sup> in the atmosphere – implications for isotope-based NO<sub>x</sub> source apportionment, *Atmos. Chem. Phys.*, 18, 11647-11661, <https://doi.org/10.5194/acp-18-11647-2018>, 2018.
- Fu, P. Q., Kawamura, K., Pavuluri, C. M., Swaminathan, T., and Chen, J.: Molecular characterization of urban organic aerosol in tropical India: contributions of primary emissions and secondary photooxidation, *Atmos. Chem. Phys.*, 10(6), 2663–2689, 2010.
- Hopke, P. K.: Discussion of “Sensitivity of a molecular marker based positive matrix factorization model to the number of receptor observations” by Yuan Xun Zhang, Rebecca J. Sheesley, Min-Suk Bae and James J. Schauer., *Atmos. Environ.* 44 (8), 1138, 2010.
- Kawamura, K., Ishimura, Y., and Yamazaki, K.: Four years’ observations of terrestrial lipid class compounds in marine aerosols from the western North Pacific, *Glob. Biogeochem. Cycles.*, 17, 1003(1), doi:10.1029/2001GB001810, 2003.
- Kerimray, A., Luis, R.-S., Torkmahalleh, M. A., Hopke, P. K., Gallachóir, B. P. Ó.: Coal use for residential heating: Patterns, health implications and lessons learned, *Ener. Sus. Develop.*, 40, 19–30, 2017.
- Liu, J., Han, Y., Tang, X., Zhu, J., and Zhu, T: Estimating adult mortality attributable to PM<sub>2.5</sub> exposure in China with assimilated PM<sub>2.5</sub> concentrations based on a ground monitoring network. *Sci. Total Environ.*, 568, 1253–1262. doi:10.1016/j.scitotenv.2016.05.165, 2016.
- Ma, Z., Hu, X., Sayer, A. M., Levy, R., Zhang, Q., Xue, Y., Tong, S., Bi, J., Huang, L., Liu, Y.: Satellite-based spatiotemporal trends in PM<sub>2.5</sub> concentrations: China, 2004–2013, *Environ. Health Perspect.*, 124, 184–192, <http://dx.doi.org/10.1289/ehp.1409481>, 2016.
- Shen, G. F., Yuan, S. Y., Xie, Y., Xia, S. J., Li L., Yao, Y. K., Qiao, Y. Z., Zhang, J., Zhao, Q. Y., Ding, A. J., Li, B., and Wu, H. S: Ambient levels and temporal variations of PM<sub>2.5</sub> and PM<sub>10</sub> at a residential site in the mega-city, Nanjing, in the western Yangtze River Delta, China, *J. Environ. Sci. Health, Part A* 49, 171–178, 2014.
- Simoneit, B. R. T., Cardoso, J. N., and Robinson, N.: An assessment of terrestrial higher molecular weight lipid compounds in aerosol particulate matter over the south Atlantic from about 30-70° S, *Chemosphere*, 23(4), 447–465, 1991.
- Wang, G., and Kawamura, K.: Molecular characteristics of urban organic aerosols from Nanjing: A case study of a mega-city in China, *Environ. Sci. Technol.*, 39(19), 7430–7438, 2005.
- Zhang, Y., and Cao, F.: Fine particulate matter (PM<sub>2.5</sub>) in China at a city level, *Scientific Reports*, 2015 DOI: 10.1038/srep14884

1 **Characterization of organic aerosols from a Chinese Mega-City during winter:**  
2 **predominance of fossil fuel combustion**

3

4 **Md. Mozammel Haque<sup>1,2,3</sup>, Kimitaka Kawamura<sup>2</sup>, Dhananjay K. Deshmukh<sup>2</sup>, Cao**  
5 **Fang<sup>1,3</sup>, Wenhui Song<sup>1,3</sup>, Bao Mengying<sup>1,3</sup> and Yan-Lin Zhang<sup>1,3\*</sup>**

6

7 *<sup>1</sup> Yale-NUIST Center on Atmospheric Environment, Department of Applied*  
8 *Meteorology, Nanjing University of Information Science and Technology, Nanjing*  
9 *210044, China*

10 *<sup>2</sup> Chubu Institute for Advanced Studies, Chubu University, Kasugai 487-8501, Japan*

11 *<sup>3</sup>Key Laboratory of Meteorological Disaster, Ministry of Education & Collaborative*  
12 *Innovation Center on Forecast and Evaluation of Meteorological Disasters, Nanjing*  
13 *University of Information Science and Technology, Nanjing 210044, China*

14

15

16 *\*Corresponding author*

17 Yan-Lin Zhang

18 E-mail: dryanlinzhang@outlook.com

19

20 2 March, 2019

21

22

23

24

25

26

27

28 **Abstract**

29  $PM_{2.5}$  aerosol samples were collected from a Chinese mega-city in Nanjing  
30 (32.21°N and 118.73°E) during winter and analyzed for more than 100 compounds of  
31 twelve organic compound classes. The most abundant classes of compounds are *n*-  
32 alkanes (average, 205 ng m<sup>-3</sup>), followed by fatty acids (76.3 ng m<sup>-3</sup>), polycyclic  
33 aromatic hydrocarbons (PAHs) (64.3 ng m<sup>-3</sup>), anhydro-sugars (56.3 ng m<sup>-3</sup>), fatty  
34 alcohols (40.5 ng m<sup>-3</sup>), and phthalate esters (15.2 ng m<sup>-3</sup>), whereas hydroxy-/polyacids  
35 (8.33 ng m<sup>-3</sup>), aromatic acids (7.35 ng m<sup>-3</sup>), hopanes (4.19 ng m<sup>-3</sup>), primary sugars and  
36 sugar alcohols (4.15 ng m<sup>-3</sup>), lignin and resin products (2.94 ng m<sup>-3</sup>), and steranes (2.46  
37 ng m<sup>-3</sup>) are less abundant. The carbon preference index of *n*-alkanes (0.83-1.38)  
38 indicated that they were significantly originated from the fossil fuels combustion.  
39 Diagnostic concentration ratios of organic tracers suggested that PAHs and hopanes are  
40 mostly originated from coal burning and traffic emissions, respectively in Nanjing  
41 urban area. Positive matrix factorization analysis demonstrated that fossil fuel  
42 combustion is the major source (28.7%) in Nanjing winter aerosols. Most of the  
43 compounds generally showed higher concentrations in nighttime compared to daytime,  
44 due to the accumulation process associated with the inversion layers and enhancement  
45 of emissions from heavy trucks at night. We conclude that fossil fuel combustion  
46 largely influences the winter organic aerosols in urban Nanjing area. Based on the  
47 comparison of present results with previous studies, we found that pollution levels on  
48 organic aerosols have been decreased in the urban Nanjing atmosphere for the last  
49 decade.

50

51 **Keywords:**  $PM_{2.5}$ , organic compounds, fossil fuel combustion, positive matrix  
52 factorization, Chinese urban aerosols.

53

## 54 **1 Introduction**

55 Particulate matter (PM) comprised a wide variety of chemical components,  
56 which are derived from a broad range of sources and processes in the atmosphere  
57 (Seinfeld and Pandis, 2006). Organic aerosol (OA) is one of the major constituents of  
58 airborne particulates, accounting for up to 70% of the fine aerosol mass. They can play  
59 a crucial role in the radiative forcing of the Earth and more generally to the environment  
60 (Kanakidou et al., 2005). In the last two decades, more attention has been paid to  
61 identify organic aerosol optical and cloud formation properties that link OA directly to  
62 hydrological cycle and thereby sustainability issues (Dusek et al., 2006; Riipinen et al.,  
63 2012). They can affect the climate, air quality, human health, visibility, and ecosystems  
64 on the local, regional and global scale (Salma et al., 2017). Several studies have  
65 reported that OA plays an important role in both the direct and indirect aerosol forcing,  
66 affecting the earth's radiation balance and global air quality (Cooke et al., 1999;  
67 Lohmann et al., 2000; Jacobson, 2001; Chung and Seinfeld, 2002). Aerosol particles  
68 improved with OM can make the aerosol surfaces more hydrophilic or hydrophobic  
69 based on the mixing state and aerosol composition, which further modify the CCN  
70 activities of particles. Furthermore, aerosols also influence air quality in addition to  
71 human health and climate, particularly in urban areas due to extensive anthropogenic  
72 emissions and favorable meteorological conditions (Watson, 2002).

73 There are two major sources of atmospheric aerosols that include both primary  
74 emissions and secondary aerosol formation. Primary organic aerosols (POA) are  
75 directly derived from various sources such as biomass burning, fossil fuels combustion,  
76 dust particles, microbial activities, and plant materials, etc., whereas secondary organic  
77 aerosols (SOA) are formed by the oxidation process of organic species in the  
78 atmosphere. Various types of volatile organic compounds (VOCs) are emitted from

79 natural and anthropogenic sources into the atmosphere. VOCs can be further photo-  
80 oxidized by OH, NO<sub>x</sub>, O<sub>3</sub> to form SOA in the atmosphere (Haque et al., 2016). Both  
81 POA and SOA can contribute to the organic particulate matter (PM) formation in the  
82 atmosphere, which can significantly control the physicochemical properties of aerosol  
83 particles (Kanakidou et al., 2005). The chemical characterization and the contributions  
84 of various sources of aerosol particles are essential to figure out the role and potential  
85 impacts of OA in the atmosphere. Moreover, OA poses adverse physiological effects on  
86 human health causing asthma, bronchitis, cancer, and heart disease, etc. (Pope et al.,  
87 2009; Ramírez et al., 2011).

88         The large emissions of atmospheric particles from China have a major effect on  
89 regional and global climate changes (Huebert et al., 2003). Atmospheric pollution in  
90 China is a serious problem due to its rapid industrialization and urbanization. Globally,  
91 one-fourth of anthropogenic POA are originated in China (Cooke et al., 1999). Many  
92 studies have been performed to characterize inorganic aerosols from China due to the  
93 significant anthropogenic emissions. (Wang et al., 2011; He et al., 2012; Zheng et al.,  
94 2015; Li et al., 2017). However, studies on OAs of Chinese mega-cities are still poorly  
95 understood (Guo et al., 2003; Bi et al., 2003; Yao et al., 2003). Nanjing is a highly  
96 industrialized mega-city located in east China with a population of over 8 million where  
97 air pollution is a critical problem. Previous studies of Wang et al. (2002a; 2002b)  
98 reported that the aerosol mass of fine particles (< 2.5 μm) in Nanjing atmosphere was  
99 about 2-4 times higher than the United States Environmental Protection Agency  
100 (USEPA) regulations. The average concentrations of PM<sub>2.5</sub> were 66±33 μg m<sup>-3</sup> in  
101 Nanjing aerosols during sampling period, whereas the Chinese Ambient Air Quality and  
102 WHO standard levels are 35 μg m<sup>-3</sup> and 25 μg m<sup>-3</sup>, respectively (Liu et al., 2016; Shen



103 et al., 2014), indicating that Nanjing air quality is still worse compared to China  
104 national and WHO standard levels.

105 The highest PM<sub>2.5</sub> concentrations were observed during winter in China due to  
106 the enhancement of anthropogenic emissions from fossil fuel combustion and biomass  
107 burning and unfavorable meteorological conditions, i.e., frequent development of  
108 inversion layers (Zhang et al., 2015). Ma et al. (2016) also reported PM<sub>2.5</sub>  
109 concentrations from 2004-2013 in China while winter was the most polluted season. To  
110 better understand the molecular composition and sources of OAs in Chinese urban area  
111 during winter, aerosol sampling campaign was carried on a day and night basis in the  
112 mega-city of Nanjing during winter period from 11 December 2014 to 11 January 2015.  
113 The objective of this study is to determine more than 100 organic compounds including  
114 aliphatic lipids, sugar compounds, polycyclic aromatic hydrocarbons (PAHs), hopanes,  
115 lignin and resin products, aromatic acids, polyacids, and steranes in the aerosol particles  
116 from Nanjing. Their chemical characteristics, diurnal patterns, and potential sources are  
117 discussed in comparison with previous studies conducted a decade ago.

## 118 **2 Experimental**

### 119 **2.1 Sample collection**

120 PM<sub>2.5</sub> sampling was performed from the rooftop of a six-story building at  
121 Nanjing University of Information Science and Technology, Nanjing, China using  
122 medium volume sampler (Laoshan, Qingdao, China) from 11 December 2014 to 11  
123 January 2015 (Figure 1). Daytime and nighttime sampling was conducted from 9:30 to  
124 21:00 and 21:30 to 9:00, respectively. Total of 62 samples was collected on prebaked  
125 (450°C for 6 h) quartz fiber filters (80 mm) with an air flow rate of 100 L min<sup>-1</sup>. After  
126 sampling, the filter samples were wrapped with aluminum foil, transported to the  
127 laboratory and stored at -20°C until the analysis.

## 128 2.2 Analysis of polar organics

129 Several polar organic compounds containing COOH and OH groups were  
130 analyzed by gas chromatography-mass spectrometry (GC-MS) using solvent extraction  
131 followed by TMS-derivatization technique (Table S1). Filter aliquots (6.28 cm<sup>2</sup>) were  
132 extracted three times with 5 mL of dichloromethane/methanol mixture (2:1) under ultra-  
133 sonication for 10 min. The solvent extracts were filtered through quartz wool packed in  
134 a Pasteur pipette to remove all insoluble matrixes, concentrated using a rotary  
135 evaporator under vacuum and then totally dried under a gentle nitrogen stream. The  
136 dried extracts were derivatized with 50  $\mu$ L of N,O-bis-(trimethylsilyl)trifluoroacetamide  
137 (BSTFA) plus 1% trimethylsilyl chloride and 10  $\mu$ L of pyridine in a glass vial (1.5 mL)  
138 with a Teflon-lined screw cap at 70°C for 3h. The C<sub>13</sub> *n*-alkane (diluted in *n*-hexane)  
139 was used as an internal standard (1.43 ng  $\mu$ L<sup>-1</sup>) prior to injection into a GC-MS for  
140 identification. Detailed information on the chemical analysis is interpreted elsewhere  
141 (Wang and Kawamura, 2005).

142 The derivatives were analyzed using Hewlett-Packard (HP) model 6890 GC  
143 coupled to an HP model 5973 mass-selective detector (MSD). The sample was injected  
144 into a splitless mode with the injector temperature at 280°C. The GC oven temperature  
145 was set at 50°C for 2 min and then increased from 50 to 120°C at 30°C min<sup>-1</sup>, and then  
146 to 300°C at 6°C min<sup>-1</sup> with a final isothermal hold at 300°C for 16 min. The GC  
147 separation was performed on a DB-5MS fused silica capillary column (30 m long  $\times$   
148 0.25 mm inner diameter  $\times$  0.5  $\mu$ m film thickness) with a carrier gas of helium (rate 1.0  
149 mL min<sup>-1</sup>). The mass spectrometer was conducted at 70 eV on an electron impact (EI)  
150 mode with a scan range from 50 to 650 Daltons (Da).

151 The organic components were determined by comparison with the retention  
152 times and mass spectra of authentic standards as well as literature and National Institute

153 of Standards and Technology (NIST) library data of mass fragmentation patterns  
154 (Medeiros and Simoneit, 2007). GC-MS relative response factor (RRF) of each  
155 compound was calculated using authentic standards and surrogate compounds. We  
156 performed a recovery experiment three times and acquired the average value of more  
157 than 80% for target compounds. The field blank filters (n = 5) were analyzed by the  
158 procedures as described above. The target species were not noticed in the blank filters.  
159 The analytical errors based on replicate analyses (n = 5) were <10%.

### 160 **2.3 Analysis of nonpolar organics**

161 Non-polar organics, including *n*-alkanes, PAHs, hopanes, and steranes were  
162 analyzed using thermal desorption gas chromatography-mass spectrometry (TD-GC-  
163 MS) technique. It should be noted that higher recoveries (>90%) were obtained for  
164 nonpolar organics using TD-GC-MS compared to TMS-derivatization/GC-MS (<70%)  
165 technique. The filter aliquots (3 mm diameter) were cut into two pieces and then placed  
166 into a TD quartz tube (78 mm long × 4 mm inner diameter) and spiked with internal  
167 standard mixture (isotope-labeled reference compounds) for quantification. The internal  
168 standards consisted of 3 deuterated PAHs, e.g., Nap-*d*<sub>8</sub>, Ace-*d*<sub>10</sub>, and Phe-*d*<sub>10</sub>.

169 Thermal desorption was performed on an Agilent GC-MS system model  
170 7890B/5977A. A capillary column (HP-5MS UI, 5% biphenyl/95% dimethylsiloxane,  
171 30 m long × 0.25 mm inner diameter × 0.25 μm film thickness) was used to separate the  
172 target compounds. The GC oven temperature programmed from 35°C (3 min) to 120°C  
173 at 10°C min<sup>-1</sup>, ramped from 120°C to 146°C at 4°C min<sup>-1</sup> and continued to 310°C at  
174 8°C min<sup>-1</sup>, then held at 310°C for 16 min. The sample on the filter punch was inserted  
175 into the TD tube with the initial temperature at 35°C before running and increased up to  
176 300°C manually at 12°C sec<sup>-1</sup> after starting the analysis. Column flow rate was 2 mL  
177 min<sup>-1</sup> and split flow was 10 mL min<sup>-1</sup> for the first 3 mins, then column and split flow

178 rate changed to 1 mL min<sup>-1</sup> and 25 mL min<sup>-1</sup>, respectively. The electron ionization mass  
179 spectra (70 eV) were conducted on a scan mode range from 50 to 650 Da. The  
180 temperatures of the ion source, quadruples and transfer line were set at 310, 150 and  
181 310°C, respectively.

## 182 **2.4 Carbonaceous components analysis**

183 Organic carbon (OC) and elemental carbon (EC) were measured using a Sunset  
184 Laboratory carbon analyzer following the IMPROVE (Interagency Monitoring of  
185 Protected Visual Environments) thermal-optical evolution protocol and assuming  
186 carbonate carbon to be insignificant in the sample (Boreddy et al., 2018). An area of  
187 1.54 cm<sup>2</sup> of each quartz filter sample was insert in a quartz boat inside the thermal  
188 desorption chamber of the analyzer, and then stepwise heating was performed.

189 A filter cut of 3.14 cm<sup>2</sup> of each sample was extracted with 20 mL organic-free  
190 ultrapure water (resistivity >18.2 MΩ cm, Sartorius arium 611 UV) under  
191 ultrasonication for 30 min. The water extracts were then passed through a membrane  
192 disc filter to throw away the insoluble filter matrixes and analyzed for water-soluble  
193 organic carbon (WSOC) using a total organic carbon (TOC) analyzer (Shimadzu, TOC-  
194 Vcsh) (Boreddy et al., 2018). The analytical errors in the triplicate analyses were within  
195 5% for all carbonaceous components and the concentrations reported here were  
196 corrected for the field blanks.

## 197 **2.5 Major inorganic ion analysis**

198 An area of 5.07 cm<sup>2</sup> of each quartz filter sample was extracted with 10.0 mL  
199 ultrapure water (> 18.2 Ω) under ultrasonication (30 min). The extract solution was  
200 filtered through a membrane disc filter (Millex-GV, Millipore) of pore size 0.22 μm to  
201 remove insoluble materials, then analyzed for inorganic ions using ion chromatography  
202 on a Thermo Fisher Scientific ICS-5000 (America) equipped with a gradient pump

203 (SP), a conductivity detector/chromatography compartment (DC) and an automated  
204 sampler (AS-DV). The cations were measured by an Ion Pac CS12A analytical column  
205 and an Ion Pac CG12A guard column with an eluent of aqueous methanesulfonic acid  
206 (MSA, 30 mM L<sup>-1</sup>) and a flow rate of 1 mL min<sup>-1</sup>. In contrast, anions were separated on  
207 an Ion Pac AS11-HC analytical column and an Ion Pac AG11-HC guard column with  
208 an eluent of sodium hydroxide (NaOH) gradient at a flow rate of 1.5 mL min<sup>-1</sup> (0-3 min,  
209 0.5 mM L<sup>-1</sup>; 3-5 min, 0.5-5 mM L<sup>-1</sup>; 5-15 min, 5-30 mM L<sup>-1</sup>; 15-20 min 0.5 mM L<sup>-1</sup>).

### 210 **3 Results and Discussion**

#### 211 **3.1 Diurnal variations and meteorological conditions**

212 No significant difference was observed between day- and night-time for organic  
213 compounds in winter aerosols from Nanjing urban area (Figure 2, Tables 1 and S1).  
214 Nevertheless, concentrations of organic compounds in nighttime were slightly higher  
215 than daytime in most of the cases. It is notable that the planetary boundary layer height  
216 (PBLH) is generally lower in nighttime than daytime causing higher concentrations of  
217 aerosol particles at night. Interestingly, we found high loadings of organics in daytime  
218 sample collected on 15 December when PBLH was high (632 m), whereas lower levels  
219 of organics were observed in nighttime of 14 December (PBLH = 82.2 m) (Figures 3  
220 and S1b).

221 We observed one episode (E1) during 2 - 5 January while PM<sub>2.5</sub> and all organic  
222 compounds showed similar temporal variations with high loadings (Figure 3).  
223 Fascinatingly, NO<sub>2</sub> showed high concentration during E1, whereas relative humidity  
224 (RH) and ozone (O<sub>3</sub>) levels were not high (Figure S1). Our results suggest that NO<sub>2</sub>  
225 influences the organic molecular compositions in urban aerosols. It is noteworthy that  
226 the major source of NO<sub>2</sub> is of vehicular exhaust origin (Kendrick et al., 2015).  
227 However, coal combustion can also emit NO<sub>x</sub> into the atmosphere (Chang et al., 2018).

228 Previous studies also reported that NO<sub>x</sub> could affect SOA formation (Kanakidou et al.,  
229 2005; Zhang et al., 2015; Mochizuki et al., 2015). Moreover, PAHs, hopanes, and  
230 steranes showed another episode on 23 and 24 December 2014 probably due to the coal  
231 combustion event. It should be noted that higher RH (81-88%) and PM<sub>2.5</sub> levels (152-  
232 226 µg m<sup>-3</sup>) cause less visibility on 29 December (1.7 km), 10 January (1.8 km), and 11  
233 January (1.6 km), which might be due to the haze formation. It is remarkable that the  
234 levels of organics were not high during these periods (Figures 3 and S1). **These results**  
235 **imply that NO<sub>2</sub> derived from fossil fuel combustion plays an important role in the**  
236 **formation of OAs in the Nanjing atmosphere.**

### 237 **3.2 Carbonaceous components**

238 The results of OC, EC, and WSOC are mentioned in Table 1. The values of OC  
239 and EC were found to be 8.76-40.0 µg m<sup>-3</sup> (ave. 18.6 µg m<sup>-3</sup>) and 2.41-30.3 µg m<sup>-3</sup> (8.25  
240 µg m<sup>-3</sup>) in daytime, and 2.98-40.1 µg m<sup>-3</sup> (19.1 µg m<sup>-3</sup>) and 0.87-22.9 µg m<sup>-3</sup> (8.86 µg  
241 m<sup>-3</sup>) in nighttime, respectively. We found that the day and night variations of OC and  
242 EC values are also not significant. The mass ratio of OC to EC (OC/EC) is often used to  
243 characterize fossil fuels and biomass burning emissions. Several investigators have used  
244 OC/EC ratios to classify the sources of carbonaceous aerosols (Ram et al., 2008;  
245 Sandradewi et al., 2008; Saarikoski et al., 2008). The higher OC/EC ratios imply that  
246 major source of carbonaceous species is from biomass burning, whereas lower ratios are  
247 characteristics of emissions from fossil fuels combustion. Sandradewi et al. (2008) have  
248 documented an average OC/EC ratio of 1.1 for vehicular emission and 7.3 for wood  
249 burning emission. Saarikoski et al. (2008) pointed out OC/EC ratios of 0.71 for  
250 vehicular emission and 6.6 for biomass burning. Watson et al. (2001) proposed the  
251 OC/EC ratios of 1.1 for vehicular emission, 2.7 for coal combustion and 9.0 for biomass  
252 burning emission. The OC/EC ratios ranged from 1.30 to 3.80 with a mean value of

253 2.40 in this study, which is comparable to the values reported for coal combustion and  
254 vehicular emission. These results suggest that fossil fuel combustion is the major source  
255 of carbonaceous aerosols in urban Nanjing.

256 The ratios of OC to EC are also used to differentiate the relative contribution of  
257 primary vs. secondary sources; high OC/EC ratios ( $>2.0$ ) were reported for the aerosols  
258 with significant contributions of SOA (Kunwar and Kawamura, 2014; Pani et al., 2017).  
259 The OC/EC ratio in this study was on average 2.40, suggesting the significant  
260 contribution of SOA in Nanjing aerosols that is consistent with PMF results (see section  
261 3.4). The concentration range of WSOC was  $5.52\text{-}26.6\ \mu\text{g m}^{-3}$  ( $11.7\ \mu\text{g m}^{-3}$ ) in daytime  
262 and  $2.51\text{-}20.2\ \mu\text{g m}^{-3}$  ( $11.8\ \mu\text{g m}^{-3}$ ) in nighttime. The WSOC/OC ratios often used to  
263 discuss the SOA formation via photochemical aging of atmospheric aerosol particles.  
264 The WSOC/OC ratios exceeding 0.4 indicate the aged aerosols with the significant  
265 contribution of SOA (Boreddy et al., 2018). The average WSOC/OC ratio of 0.64 in the  
266 present study indicates that OAs in Nanjing were relatively aged. Moreover, air mass  
267 back trajectories also indicate that some air masses come from the polluted regions over  
268 North China, suggesting a SOA formation during long-range transport (Figure S5).

### 269 3.3 Organic molecular compositions

270 We detected twelve organic compound classes, including sugars, lignin and  
271 resin acids, fatty acids, fatty alcohols, *n*-alkanes, PAHs, hopanes, steranes, glycerol and  
272 polyacids, phthalate esters, and aromatic acids in the aerosol samples from Nanjing. The  
273 total concentrations of organics were on average  $424\ \text{ng m}^{-3}$  in daytime and  $555\ \text{ng m}^{-3}$   
274 in nighttime with the predominance of *n*-alkanes followed by fatty acids, PAHs,  
275 anhydro-sugars, fatty alcohols, phthalate esters, glycerol and polyacids, aromatic acids,  
276 sugars, hopanes, lignin and resin acids, and steranes (Figure 2). Table S1 shows the

277 values of identified organic compounds. Levoglucosan was the single dominant species  
278 followed by C<sub>16</sub> and C<sub>24</sub> fatty acids, and C<sub>29</sub> *n*-alkane (Table S1).

### 279 **3.3.1 Aliphatic lipid components**

280 The lipid compounds, e.g., fatty acids, fatty alcohols, and *n*-alkanes are mainly  
281 originated from marine or microbial detritus, terrestrial higher plant waxes, and fossil  
282 fuels combustion. Homologues of *n*-alkanes (C<sub>13</sub>-C<sub>39</sub>) were detected with higher  
283 concentrations in nighttime (74.8-535 ng m<sup>-3</sup>, ave. 228 ng m<sup>-3</sup>) than daytime (97.6-497  
284 ng m<sup>-3</sup>, 184 ng m<sup>-3</sup>) with a maximum at C<sub>29</sub> (14.0 ng m<sup>-3</sup> during daytime and 17.9 ng m<sup>-3</sup>  
285 during nighttime) in Nanjing aerosols (Tables 1 and S1, Figure 4a). These  
286 concentrations are comparable to those reported from urban cities in Hong Kong (195  
287 ng m<sup>-3</sup>) and Shanghai (259 ng m<sup>-3</sup>) (Wang et al., 2006), but much higher than the  
288 western North Pacific region (0.11-14.1 ng m<sup>-3</sup>) (Kawamura et al., 2003). Concentration  
289 levels of *n*-alkanes in this study are not significantly different from previous studies in  
290 Nanjing (112-265 ng m<sup>-3</sup>, 172 ng m<sup>-3</sup> during daytime; 61.0-503 ng m<sup>-3</sup>, 278 ng m<sup>-3</sup>  
291 during nighttime) (Table 2) (Wang and Kawamura, 2005).

292 Biogenic *n*-alkanes showed stronger odd/even carbon number predominance  
293 with a carbon preference index (CPI) of >5, whereas anthropogenic *n*-alkanes CPI value  
294 is usually close to unity (Simoneit et al., 1991a, 2004c). CPI values obtained in this  
295 study ranged from 1.18-1.32 (ave. 1.28) in daytime and 1.10-1.37 (1.24) in nighttime,  
296 which is close to unity. This result suggests that the major contributor of *n*-alkanes is  
297 the anthropogenic activity such as fossil fuels combustion with less contribution from  
298 higher plants in Nanjing aerosols. The present CPI values are similar with those from  
299 other Chinese urban areas (ave. 1.16) (Wang et al., 2006) and Tokyo (1.10-2.80, ave.  
300 1.50) (Kawamura et al., 1995). On the contrary, higher CPI values were reported for  
301 Mt. Tai (4.60) (Fu et al., 2008) and Chichi-jima aerosols (4.50) (Kawamura et al.,



2003), where *n*-alkanes were mainly originated from terrestrial higher plant waxes. Plant wax derived *n*-alkanes are estimated as the excess of odd homologues minus adjacent even homologues (Simoneit et al., 1991b, 2004c), which is attributable to vascular plant waxes (Tables 1 and S1). Concentrations ranges of higher plant wax derived *n*-alkanes were 2.12-48.1 ng m<sup>-3</sup> (ave. 15.5 ng m<sup>-3</sup>) in daytime and 0.86-58.9 ng m<sup>-3</sup> (17.6 ng m<sup>-3</sup>) in nighttime, both of which are much lower than total *n*-alkanes, indicating that *n*-alkanes in Nanjing urban area are derived mainly from fossil fuel combustion.

A homologous series of C<sub>12:0</sub>-C<sub>32:0</sub> saturated fatty acids, including two unsaturated fatty acids (C<sub>18:1</sub> and C<sub>18:2</sub>), were identified in Nanjing samples. The values of total fatty acids ranged from 14.3 to 254 ng m<sup>-3</sup> (ave. 66.8 ng m<sup>-3</sup>) during daytime, whereas they ranged from 8.59 to 252 ng m<sup>-3</sup> (91.3 ng m<sup>-3</sup>) during nighttime. It is notable that fatty acids are less abundant compared to *n*-alkanes in Nanjing samples (Figure 2). The molecular distributions of fatty acids are observed by a strong even carbon number predominance with C<sub>max</sub> at C<sub>16:0</sub> and C<sub>24:0</sub> (Table S1 and Figure 4b). CPI values of fatty acids are found to be 5.41 in daytime and 5.52 in nighttime samples. A similar distribution pattern has been proposed in marine and continental aerosols (Mochida et al., 2002; Kawamura et al., 2003; Fu et al., 2008). LMW fatty acids (<C<sub>20:0</sub>) are originated from various sources, e.g., vascular plants, microbial sources, and marine phytoplankton, while HMW fatty acids (>C<sub>20:0</sub>) are derived from terrestrial higher plant waxes (Kawamura et al., 2003; Kolattukudy, 1976; Simoneit, 1978). Biomass burning, motor vehicles, and cooking can also be the important sources of fatty acids in urban areas (Fu et al., 2010). The values of C<sub>18:1</sub> was observed lower in daytime than nighttime, suggesting an enhanced emission to the atmosphere and oxidation with a higher rate in daytime (Kawamura and Gagosian, 1987).

327 Concentration ranges of C<sub>12</sub>-C<sub>34</sub> fatty alcohols were 7.30-165 ng m<sup>-3</sup> (ave. 36.9  
328 ng m<sup>-3</sup>) during daytime and 4.61-129 ng m<sup>-3</sup> (43.8 ng m<sup>-3</sup>) during nighttime (Table S1  
329 and Figure 2). Their molecular distributions are characterized by a strong even-to-odd  
330 carbon number predominance with C<sub>max</sub> at C<sub>28</sub> or C<sub>30</sub> (Figure 4c). We found that the  
331 CPI values of fatty alcohols in Nanjing aerosols (2.56-10.3, ave. 5.22 in daytime and  
332 3.06-15.5, 6.32 in nighttime) are lower than those of aerosols from Chennai, India  
333 (9.75±2.94) (Fu et al., 2010) and Mt. Tai, China (CPIs 7.95-66.5, ave. 25.6 in daytime  
334 and 12.2-53.4, 22.8 in nighttime) (Fu et al., 2008). HMW fatty alcohols (>C<sub>20</sub>) are  
335 dominant in the terrestrial higher plant, soils, and loess deposits, whereas LMW fatty  
336 alcohols (<C<sub>20</sub>) are dominant in marine biota and soil microbes (Simoneit et al., 1991b).  
337 Moreover, a large amount of fatty alcohols together with fatty acids and *n*-alkanes can  
338 also be derived from biomass burning (Simoneit, 2002). A positive correlation was  
339 observed between fatty alcohols and levoglucosan ( $r = 0.60$ ,  $p < 0.001$ ), indicating that  
340 fatty alcohols are partly originated from biomass burning in Nanjing winter aerosols  
341 (Figure S2c). This conclusion is further supported by the factors resolved by PMF  
342 analysis, where high loading of fatty alcohols was found with a biomass burning tracer  
343 levoglucosan.

### 344 **3.3.2 Biomass burning tracers**

345 Levoglucosan, galactosan, and mannosan are class of anhydro-sugars, which are  
346 produced by the pyrolysis of cellulose and hemi-cellulose (Simoneit, 2002).  
347 Levoglucosan is a unique tracer of biomass burning, and has been reported in urban  
348 (Wang et al., 2006; Fu et al., 2010; Yttri et al., 2007), marine (Simoneit et al., 2004b;  
349 Ding et al., 2013), and polar regions (Stohl et al., 2007; Fu et al., 2009). Levoglucosan  
350 is a relatively stable species in the atmospheric aerosol and could be transported long  
351 distances (Mochida et al., 2010). We found that levoglucosan is one of the most

352 abundant single tracer among all the identified compounds in the presents study, with a  
353 concentration range of 4.79-179 ng m<sup>-3</sup> (ave. 38.4 ng m<sup>-3</sup>) during daytime and 4.96-354  
354 ng m<sup>-3</sup> (66.0 ng m<sup>-3</sup>) during nighttime (Tables 1 and S1, Figure 5a), although the values  
355 are lower than previous results reported in Nanjing (Wang and Kawamura, 2005).

356 Levoglucosan could account for up to 90% of total sugars in Chinese urban  
357 aerosols (Wang et al., 2006). The contribution of levoglucosan to OC and WSOC were  
358 0.02-0.51% (ave. 0.09%) and 0.03-0.57% (0.13%) in daytime and 0.02-0.48% (0.13%)  
359 and 0.03-0.78% (0.22%) in nighttime, respectively. Galactosan and mannosan were also  
360 detected in the aerosol samples. The amounts of galactosan were found to be 0.65-7.47  
361 ng m<sup>-3</sup> (ave. 2.26 ng m<sup>-3</sup>) in daytime and 0.48-7.75 ng m<sup>-3</sup> (3.13 ng m<sup>-3</sup>) in nighttime,  
362 whereas those of mannosan were 0.36-4.30 ng m<sup>-3</sup> (1.62 ng m<sup>-3</sup>) in daytime and 0.27-  
363 5.73 ng m<sup>-3</sup> (2.06 ng m<sup>-3</sup>) in nighttime (Table S1 and Figure 5a). Levoglucosan showed  
364 similar temporal trends and strong correlations with galactosan ( $r = 0.87$ ,  $p < 0.001$ ) and  
365 mannosan ( $r = 0.84$ ,  $p < 0.001$ ) (Figure S2a). It should be noted that the levoglucosan  
366 level in this study is 4-6 times lower than that of a previous study in Nanjing (Table 2)  
367 (Wang and Kawamura, 2005). This result implies that biomass-burning emissions have  
368 been decreased significantly in the last decade in the Nanjing area during winter.

369 We detected four lignin and resin products, i.e., 4-hydroxybenzoic, vanillic,  
370 syringic, and dehydroabiatic acids, which have been used as biomass-burning tracers  
371 (Simoneit et al., 2004c). Lignin is a wood polymer, which can produce phenolic acids  
372 during burning whereas dehydroabiatic acid is more specific to conifer resin (Simoneit,  
373 2002). We found that 4-hydroxybenzoic acid was dominant among all lignin and resin  
374 products identified in Nanjing samples (Figure 5b). The concentration ranges of 4-  
375 hydroxybenzoic, vanillic and syringic acids in day- and night-time were 0.65-4.31 ng m<sup>-3</sup>  
376 <sup>3</sup> (ave. 1.80 ng m<sup>-3</sup>) and 0.62-4.96 ng m<sup>-3</sup> (2.01 ng m<sup>-3</sup>), 0.04-0.92 ng m<sup>-3</sup> (0.25 ng m<sup>-3</sup>)

377 and 0.08-0.66 ng m<sup>-3</sup> (0.25 ng m<sup>-3</sup>), and 0.04-0.57 ng m<sup>-3</sup>(0.17 ng m<sup>-3</sup>) and 0.05-0.43 ng  
378 m<sup>-3</sup> (0.20 ng m<sup>-3</sup>), respectively. The value of dehydroabietic acid was observed 0.11-  
379 1.16 ng m<sup>-3</sup> (0.46 ng m<sup>-3</sup>) during daytime and 0.00-8.29 ng m<sup>-3</sup> (0.93 ng m<sup>-3</sup>) during  
380 nighttime. The levels of lignin and resin acids in this study are 1-10 orders of magnitude  
381 lower than those from India (Fu et al., 2010) and China (Wang et al., 2006). Lignin  
382 products showed strong correlations with levoglucosan ( $r = 0.60-0.72$ ,  $p < 0.001$ ),  
383 suggesting the similar sources and origins. In contrast, there is no correlation of  
384 dehydroabietic acid with levoglucosan ( $r = 0.07$ ), indicating a different source of  
385 dehydroabietic acid in Nanjing aerosols. The low concentrations of dehydroabietic acid  
386 imply that boreal conifer forest fires are not important for the Nanjing aerosols.

### 387 **3.3.3 Primary sugars and sugar alcohols**

388 Sugar compounds are considered as tracers for primary biological aerosol  
389 particles, which are water-soluble and thus contribute to WSOC in aerosol particles  
390 (Elbert et al., 2007; Medeiros et al., 2006; Yttri et al., 2007). Four primary sugars  
391 (glucose, fructose, trehalose, and sucrose) and four sugar alcohols (erythritol, arabitol,  
392 mannitol, and inositol) were identified in the aerosol samples from Nanjing. The sugar  
393 compounds are generated from micro-organism (pollen, fungi, and bacteria), plants,  
394 flowers, resuspension of surface soil and unpaved road dust (Graham et al., 2003;  
395 Simoneit et al., 2004a; Yttri et al., 2007). They can also be originated during biomass  
396 burning. Total concentrations of primary sugars measured were 0.78-7.02 ng m<sup>-3</sup> (ave.  
397 2.90 ng m<sup>-3</sup>) in daytime and 0.50-6.58 ng m<sup>-3</sup> (2.98 ng m<sup>-3</sup>) in nighttime, whereas those  
398 of sugar alcohols were 0.30-2.90 ng m<sup>-3</sup> (1.16 ng m<sup>-3</sup>) during daytime and 0.19-2.75 ng  
399 m<sup>-3</sup> (1.27 ng m<sup>-3</sup>) during nighttime.

400 Most primary sugars exhibited higher concentrations in daytime than nighttime  
401 except for glucose (Figure 5c). Graham et al. (2003) proposed that fructose and glucose

402 along with sucrose are emitted as fern spores, pollen, and other “giant” bioaerosol  
403 particles in daytime. Glucose showed a significant correlation with levoglucosan ( $r =$   
404  $0.75$ ,  $p < 0.001$ ) (Figure S2d), indicating that it is associated with biomass burning,  
405 which can interpret high levels of glucose in nighttime, whereas other primary sugars  
406 showed weak correlations with levoglucosan ( $r = 0.05-0.09$ ). Biomass burning as a  
407 source of glucose has also been proposed by Fu et al. (2008). Trehalose is mostly  
408 derived from microorganisms such as bacteria, fungi, and yeast and also small amount  
409 from higher plants, and invertebrates (Medeiros et al., 2006). It is also considered as a  
410 product of unpaved road dust and resuspension of surface soil (Simoneit et al., 2004b;  
411 Wang and Kawamura, 2005).

412 On the contrary, all sugar alcohols presented higher concentrations in nighttime  
413 than in daytime while the scenario is opposite for primary sugars. Significant  
414 correlations were observed between sugar alcohols and levoglucosan ( $r = 0.51-0.75$ ,  
415  $p < 0.001$ ), suggesting a contribution of biomass burning to primary bio-aerosol particles,  
416 which can explain their higher concentrations in nighttime. Previous articles proposed  
417 that a huge amount of sugars and sugar alcohols can be emitted through the combustion  
418 of green vegetation from temperate forests (Medeiros and Simoneit, 2008). The sugar  
419 polyols are produced mainly from microbial sources, e.g., fungi, bacteria. They can also  
420 release from the bark of trees, leaves, and branches. The values of sugar compounds in  
421 this study are lower than other Chinese urban areas (Wang et al., 2006).

#### 422 **3.3.4 Polycyclic aromatic hydrocarbons**

423 PAHs have severe health effect due to their genotoxicity and carcinogenicity.  
424 These aromatic compounds are mainly emitted from anthropogenic activities, including  
425 biomass burning, coal combustion, vehicular emissions, and natural gas combustion.  
426 PAHs showed a weak positive correlation with levoglucosan ( $r = 0.20$ ), suggesting that

427 there is no serious contribution of PAHs from biomass burning activities in Nanjing  
428 aerosols. Total seventeen PAHs were identified in the Nanjing samples with the  
429 concentration range of 29.5-106 ng m<sup>-3</sup> (ave. 54.5 ng m<sup>-3</sup>) in daytime and 21.7-223 ng  
430 m<sup>-3</sup> (72.5 ng m<sup>-3</sup>) in nighttime (Tables 1 and S1, Figure 2). The higher concentrations of  
431 PAHs in nighttime might be due to the lower dispersion of the boundary layer at night  
432 (Figure 6a). Furthermore, households coal combustion has a significant contribution to  
433 the air quality in China during winter (Kerimray et al., 2017). Temperature falls down  
434 during nighttime resulting in the uses of a large amount of coal for house heating in a  
435 rural area due to a cold weather. Heavy-duty trucks that are permitted by the local  
436 government to work only at night as well as coal combustion should contribute to  
437 higher concentrations of PAHs into the air in nighttime. Our values are 3-4 times higher  
438 than those found in Hong Kong (14 ng m<sup>-3</sup>) but lower than those in Beijing winter  
439 aerosols (208 ng m<sup>-3</sup>) (Wang et al., 2006). Fluoranthene was found as a dominant PAH  
440 (ave. 8.24 ng m<sup>-3</sup>) in Nanjing aerosol samples followed by chrysene (6.72 ng m<sup>-3</sup>),  
441 pyrene (6.42 ng m<sup>-3</sup>) and benzo(b)fluoranthene (BbF) (5.85 ng m<sup>-3</sup>) (Figure 6a).

442 PAHs can be further photooxidized to form SOA, i.e., phthalic acid in the  
443 atmosphere (Zhang et al., 2016). Ding et al. (2007) proposed that PAHs could be  
444 degraded during long-range transport. Therefore, the ratios of PAH isomer pairs can be  
445 used to interpret the chemical aging of PAHs in the atmosphere. Benzo[a]anthracene  
446 (BaA) and benzo(a)pyrene (BaP) are expected to be degraded more easily than their  
447 isomers during transportation due to their higher reactivity. Thus, the lower ratios (<1.0)  
448 of benzo[a]anthracene (BaA)/chrysene (Chry) and benzo(a)pyrene (BaP)/  
449 benzo(e)pyrene (BeP) indicate relatively more photochemical processing of PAHs. The  
450 ratios of BaA/Chry and BaP/BeP were calculated 0.79 and 0.88, respectively, which

451 imply that PAHs of Nanjing aerosols were more aged due to the atmospheric  
452 transportation from long distances.

453 Characteristic ratios of PAHs are indicative of their specific sources. Previous  
454 studies (Wang et al., 2007a, 2009; Bi et al., 2005) pointed out that the concentration  
455 ratios of indeno(1,2,3-cd)pyrene to benzo(ghi)perylene (IP/BghiP), and  
456 benzo(ghi)perylene to benz(e)pyrene (BghiP/BeP), are indicative of different emission  
457 sources (Table 3). The ratios of IP/BghiP nearby 0.22, 0.50 and 1.3 are attributable to  
458 gasoline, diesel, and coal combustion sources, respectively. On the other hand,  
459 BghiP/BeP ratio of 2.0 indicates mobile exhausts and 0.8 indicates coal combustion  
460 emissions (Grimmer et al., 1983; Ohura et al., 2004). Furthermore, the  
461 fluoranthene/(fluoranthene+pyrene) (Flut/(Flut + Pyr)) ratios of 0.46-0.56 indicate  
462 vehicular emissions, especially from catalytic converter-equipped automobiles (0.44),  
463 whereas IP/(BghiP+IP) ratios (0.18, 0.37 and 0.56) are for cars, diesel, and coal  
464 combustion, respectively (Bi et al., 2005).

465 In this study, we found the ratios of IP/BghiP, Bghi/BeP, Flut/(Flut + Pyr), and  
466 IP/(IP+BghiP) are 1.23, 1.17, 0.56, and 0.55, respectively. The ratios are closer to those  
467 in coal burning emissions than in vehicular exhausts. These results imply that PAH  
468 components in Nanjing winter aerosols are mainly derived from coal combustion. The  
469 PAH compositions of our study are different from those reported from Sacramento  
470 (Kleeman et al., 2008), Los Angeles and London (Finlayson-Pitts and Pitts Jr, 2000), in  
471 which BghiP/BeP ratios are 5.6, 3.5 and 1.7, respectively, when vehicular emissions  
472 were the major sources for PAHs in these cities. The present PAH concentrations in  
473 Nanjing aerosols are lower than those found in a previous study from Nanjing samples  
474 collected in 2004 (Table 2) (Wang et al., 2007a) and one-fourth of those collected in

475 2001 (214 ng m<sup>-3</sup>) (Yang et al., 2005), indicating the local air quality in Nanjing is  
476 improving since 2001.

### 477 **3.3.5 Hopanes and Steranes**

478 Hopane and sterane isomers are considered as biomarkers of fossil fuel  
479 emissions, which belong to the higher boiling fraction of crude oil and are more  
480 resistant to degradation than *n*-alkanes. They are abundantly originated from the crude  
481 oil and engine oil, and consequently in vehicle exhaust from unburned lubricating oil  
482 residues and road dust (Ding et al., 2009). Six hopane compounds were identified in the  
483 Nanjing urban samples (Table S1) with higher levels in nighttime (0.13-26.1 ng m<sup>-3</sup>,  
484 ave. 4.16 ng m<sup>-3</sup>) and lower levels in daytime (0.09-20.8 ng m<sup>-3</sup>, 3.78 ng m<sup>-3</sup>) (Figure 2).  
485 The concentrations of hopane in the present study are comparable with those from other  
486 Chinese cities and Tokyo (0.7-15 ng m<sup>-3</sup>; 5.5 ng m<sup>-3</sup>) (Wang et al., 2006). Wang et al.  
487 (2009) reported that concentrations of hopanes in the urban samples were 2 orders of  
488 magnitude higher than those in the mountain samples whereas hopanes were not  
489 detectable in the marine samples.

490 The diagnostic ratios of hopanes can differentiate their sources (Table 3). The  
491 17 $\alpha$ (H)-21 $\beta$ (H)-29-norhopane (C<sub>29</sub> $\alpha\beta$ )/17 $\alpha$ (H)-21 $\beta$ (H)-hopane (C<sub>30</sub> $\alpha\beta$ ) ratios of 0.59-  
492 0.66, 0.42, and 0.58-2.0 are attributable to gasoline, diesel and coal burning emissions,  
493 respectively (Rogge et al., 1993a; Oros and Simoneit, 2000). In addition, the ratios of  
494 17 $\alpha$ (H)-21 $\beta$ (H)-22S-homohopane/(17 $\alpha$ (H)-21 $\beta$ (H)-22S-homohopane + 17 $\alpha$ (H)-21 $\beta$ (H)-  
495 22R-homohopane) [C<sub>31</sub> $\alpha\beta$ S/(C<sub>31</sub> $\alpha\beta$ S + C<sub>31</sub> $\alpha\beta$ R)] ranging from 0.60-0.62, 0.50, and  
496 0.05-0.37 indicate gasoline, diesel and coal burning emissions, respectively (Rogge et  
497 al., 1993a; Oros and Simoneit, 2000). We observed that concentration ratios of  
498 C<sub>29</sub> $\alpha\beta$ /C<sub>30</sub> $\alpha\beta$  and C<sub>31</sub> $\alpha\beta$ S/(C<sub>31</sub> $\alpha\beta$ S+ C<sub>31</sub> $\alpha\beta$ R) in this study are 0.58 and 0.48,  
499 respectively, which are near to those in vehicular emissions than coal combustion. Thus,



500 hopanes in the Nanjing aerosol are predominantly emitted from traffic emissions due to  
501 rapidly increasing of automobiles in Chinese mega-cities.

502 A series of steranes were also identified in the present study. Concentration  
503 ranges of total steranes were 1.14-9.16 ng m<sup>-3</sup> (ave. 2.29 ng m<sup>-3</sup>) during daytime and  
504 1.09-11.1 ng m<sup>-3</sup> (2.64 ng m<sup>-3</sup>) during nighttime. The diurnal distribution patterns of  
505 steranes showed remarkable similarity with hopanes. The strong correlation coefficient  
506 was also observed between steranes and hopanes ( $r = 0.94$ ,  $p < 0.001$ ), indicating their  
507 similar emission sources (Figure S3d). It is reasonable because homologues of hopanes  
508 and steranes are very stable and have similar atmospheric fates (Ding et al., 2009). In  
509 contrast, PAHs showed positive correlations with hopanes and steranes with a lower  
510 correlation coefficient ( $r = 0.42$ ,  $p < 0.001$ ), indicating their partly similar sources.

### 511 **3.3.6 Phthalates**

512 Phthalates are common additives widely used as a softener and plasticizers in  
513 polyvinylchloride (PVC) and synthetic polymers, respectively. It can be emitted into the  
514 atmosphere through the evaporation process due to their weak bonding in the polymer.  
515 Phthalates have potential health effect due to their endocrine disrupting and  
516 carcinogenic properties (Sidhu et al., 2005). It is necessary to pay attention to phthalates  
517 as toxic components in the aerosol particles. However, few studies have reported their  
518 atmospheric distribution over China (Fu et al., 2008; Wang et al., 2006, 2007a). Four  
519 phthalate esters, i.e., diethyl (DEP), di-iso-butyl (DiBP), di-n-butyl (DnBP), and di-(2-  
520 ethylhexyl) (DEHP) phthalates were characterized in this study with total  
521 concentrations of 13.9 ng m<sup>-3</sup> (range, 2.66-40.0 ng m<sup>-3</sup>) in daytime and 16.3 ng m<sup>-3</sup>  
522 (3.79-51.8 ng m<sup>-3</sup>) in nighttime (Figure 7a). DnBP (ave. 8.07 ng m<sup>-3</sup>) is the dominant  
523 tracer, followed by DEHP (4.00 ng m<sup>-3</sup>), DiBP (2.59 ng m<sup>-3</sup>) and DEP (0.14 ng m<sup>-3</sup>).  
524 The levels of phthalates in this study are 4-20 times lower than those proposed in other

525 Chinese megacities in 2006 (Wang et al., 2006), although comparable than those  
526 observed from Paris, France (8.2 ng m<sup>-3</sup>) (Teil et al., 2006), Sweden (3.7 ng m<sup>-3</sup>)  
527 (Thuren and Larsson, 1990), and Texas, USA (2.1 ng m<sup>-3</sup>) (Weschler, 1984).

528 The evaporation of phthalates can be accelerated under high ambient  
529 temperature conditions. The higher values in nighttime than daytime of phthalates in  
530 Nanjing aerosol is opposite with the result of Mt. Tai aerosols (Fu et al., 2008) due to  
531 the decreased PBLH in nighttime. Moreover, there is no significant difference in  
532 temperature between day and night during the campaign in Nanjing (Figure S1).  
533 Significant correlations were found between DEP and DiBP ( $r = 0.85$ ,  $p < 0.001$ ) as well  
534 as DiBP and DnBP ( $r = 0.87$ ,  $p < 0.001$ ) (Figures S4a and S4b), suggesting that these  
535 compounds are commonly used as plasticizers in China and released in the same way  
536 into the atmosphere. It should be noted that the concentration level of phthalates in this  
537 study is 1-2 orders of magnitude lower than those found in Nanjing aerosols collected in  
538 2004 (ave. 230 ng m<sup>-3</sup>) (Wang et al., 2007a), suggesting a significant improvement of  
539 local air quality in Nanjing regarding plastic emission.

### 540 **3.3.7 Aromatic acids**

541 We detected benzoic acid and three phthalic acids in the urban aerosols from  
542 Nanjing with total concentrations of 6.70 ng m<sup>-3</sup> (1.53-23.1 ng m<sup>-3</sup>) in daytime and 8.37  
543 ng m<sup>-3</sup> (1.99-18.5 ng m<sup>-3</sup>) in nighttime (Figure 7b). These acids can play a significant  
544 role to increase the formation of new particles in the atmosphere (Zhang et al., 2004).  
545 Benzoic acid ranged from 0.17-0.95 ng m<sup>-3</sup> (ave. 0.45 ng m<sup>-3</sup>) in daytime and 0.24-1.22  
546 ng m<sup>-3</sup> (0.54 ng m<sup>-3</sup>) in nighttime (Table S1), which is 1 and 4 orders of magnitude  
547 lower than summertime aerosol of Mt. Tai and wintertime aerosol of tropical India,  
548 respectively (Fu et al., 2008, 2010). Benzoic acid is primarily emitted from automobiles

549 (Rogge et al., 1993b; Kawamura et al., 2000) but also been proposed as a secondary  
550 component via a photooxidation of several aromatic hydrocarbons (Fu et al., 2010).

551 Total phthalic acids varied from 1.40-21.9 ng m<sup>-3</sup> (ave. 6.25 ng m<sup>-3</sup>) during  
552 daytime and 1.76-16.8 ng m<sup>-3</sup> (7.83 ng m<sup>-3</sup>) during nighttime. Their concentrations are  
553 lower than those found during aircraft measurement over China in summer (17±13 ng  
554 m<sup>-3</sup>) (Wang et al., 2007b) but higher than the samples measured from the northwestern  
555 Pacific (ave. 1.5 ng m<sup>-3</sup>) (Simoneit et al., 2004a). The molecular distributions of  
556 phthalic acids showed the dominance of terephthalic acid (Figure 7b), which accounted  
557 for 82% of total aromatic acids in Nanjing samples. Phthalic acids are SOA products  
558 produced from several PAHs (Oliveira et al., 2007; Fine et al., 2004). It is noteworthy  
559 that PAHs mostly produce phthalic acids over the North China Plain (Fu et al., 2008).  
560 Terephthalic acid can be derived from plastics burning as well (Fu et al., 2010).

561 Aromatic acids showed positive correlations with 4 and 5 rings PAHs ( $r = 0.56$ ,  
562  $p < 0.001$ ) and phthalates ( $r = 0.71$ ,  $p < 0.001$ ) (Figure S3c), suggesting that they are  
563 primarily derived from PAHs. Furthermore, aromatic acids showed significant  
564 correlation with oxidation products of polyacids ( $r = 0.83$ ,  $p < 0.001$ ) (Figure S4c),  
565 indicating the secondary oxidation process is a major source of aromatic acids.  
566 However, higher concentrations of aromatic acids in nighttime rather than daytime may  
567 not explain photochemical oxidation. We propose two explanations for the high level of  
568 SOA products in nighttime. First, SOA products are formed during long-range  
569 atmospheric transport that is consistent with aged PAHs in the aerosols as discussed  
570 above (section 3.3.4). Second, NO<sub>x</sub> can play an important role to oxidize PAHs in  
571 nighttime when NO<sub>x</sub> concentration is high (Offenberg et al., 2007; Henze et al., 2008).  
572 However, further studies are needed for the justification of NO<sub>x</sub> influence in the  
573 Nanjing atmosphere.

### 574 3.3.8 Hydroxy-/polyacids

575 Glycerol and several polyacids were identified in all the samples from Nanjing  
576 (Table S1). Glycerol is a primary product of a metabolic reaction of soil organisms,  
577 while polyacids are secondarily produced by photo-oxidation of organic precursors  
578 (Simoneit et al., 2004c). Glycerol didn't show significant correlation with polyacids ( $r =$   
579  $0.21-0.38$ ), implying their different sources (i.e., primary and secondary). Kawamura  
580 and Ikushima(1993), and Matsunaga et al. (1999) reported that malic acid is a  
581 photooxidation product of succinic acid, which is one of the photooxidation products of  
582 biogenic unsaturated fatty acids (BUFAs) in the atmosphere. Moreover, SOA tracers,  
583 including malic and tartaric acids are produced by the photochemical oxidation of  
584 isoprene (Claeys et al., 2004).

585 The concentration range of glycerol was  $0.66-5.99 \text{ ng m}^{-3}$  (ave.  $2.67 \text{ ng m}^{-3}$ )  
586 during daytime and  $0.73-8.72 \text{ ng m}^{-3}$  ( $3.50 \text{ ng m}^{-3}$ ) during nighttime. Glycerol is a  
587 dominant component in this group (Table S1 and Figure7c), which is consistent with  
588 the previous report from Nanjing aerosol in 2004-2005, whereas present concentration  
589 level is lower than that reported in Nanjing (Wang and Kawamura, 2005).  
590 Concentrations ranges of total polyacids were  $1.21-23.5 \text{ ng m}^{-3}$  ( $5.1 \text{ ng m}^{-3}$ ) during  
591 daytime and  $2.05-11.2 \text{ ng m}^{-3}$  ( $5.80 \text{ ng m}^{-3}$ ) during nighttime, among which tartaric acid  
592 ( $2.18 \text{ ng m}^{-3}$ ) was dominant (Figure 7c). Tartaric acid presented a positive correlation  
593 with levoglucosan ( $r = 0.75$ ,  $p < 0.001$ ) (Figure S2b), suggesting an influence of biomass  
594 burning. Significant correlations were found among all polyacids ( $r = 0.50-0.75$ ,  
595  $p < 0.001$ ), indicating their similar source or formation pathway. Polyacids showed a  
596 strong correlation with WSOC ( $r = 0.85$ ,  $p < 0.001$ ) (Figure S4d), indicating their water-  
597 soluble and hygroscopic nature and therefore it might influence the CCN activities of  
598 aerosol particles. It should be noted that secondary oxidation products are formed

599 during long-range atmospheric transport, which can explain high values of polyacids in  
600 nighttime. This result is consistent with the high WSOC/OC ratio in Nanjing aerosols  
601 (see section 3.2) as well as air mass back trajectories (Figure S5).

### 602 **3.4 Source apportionment of organic aerosols using PMF**

603 Positive matrix factorization (PMF5.0, USEPA) analysis was performed in this  
604 study for better understanding the sources of the identified components. It is a statistical  
605 source apportionment model widely used to verify underlying covariance among  
606 chemical parameters (Paatero and Tapper, 1994; Jaekels et al., 2007). Detailed  
607 information of the PMF model can be found elsewhere (Paatero, 1997; Paatero and  
608 Tapper, 1994). PMF model was applied for apportioning ambient PM to motor vehicle  
609 and wood combustion emission, SOA, and two-point sources using organic molecular  
610 markers (Jaekels et al., 2007). This model has also been extensively used for  
611 identifying source profile and source contribution of PM based elemental and organic  
612 markers data (Song et al., 2001; Buzcu et al., 2003; Jaekels et al., 2007; Jia et al.,  
613 2010). The analytical errors estimated for the measured values of chemical species in  
614 PMF analysis are 10%. The detected organic compound classes were subjected to  
615 source apportionment evaluation to make the classifications of sources using the model.  
616 PMF model application resolved 5 source factors based on Q values that contributed to  
617 ambient PM<sub>2.5</sub> in this study. OC, EC and some inorganic ions were also used to  
618 investigate possible different sources. We used PM<sub>2.5</sub> as the sum of total variables  
619 during the model convergence. Figure 8 shows composition source profiles for the five  
620 factors resolved by PMF analysis, where factor 3 is a dominant source.

621 Factor 1 is dominated by levoglucosan (69%) followed by fatty alcohol (C<sub>30</sub>)  
622 (56%), arabitol (44%) and *n*-alkane (C<sub>29</sub>) (34%). Factor 1 is associated with biomass  
623 burning because levoglucosan is a specific tracer of biomass burning. Moreover, fatty

624 alcohols, fatty acids, *n*-alkanes, and sugar compounds can also be emitted from biomass  
625 burning. Biomass materials, including rice and wheat straws, and cotton stems, are  
626 widely used for domestic cooking in rural areas around Nanjing, particularly in the  
627 evening. Therefore, particles from biomass burning are abundantly released into the  
628 atmosphere and then transported to the Nanjing urban area. This idea is consistent with  
629 high loadings of biomass burning tracers during nighttime.

630         Factor 2 is enriched with  $\text{nss-Ca}^{2+}$  (75 %), suggesting that the component is  
631 associated with soil dust because it is a specific tracer of soil dust (Athanasopoulou et  
632 al., 2010; Brahney et al., 2013). Many infrastructures of the urban area are constructing  
633 in China, which can produce dust particles largely and emit into the atmosphere. Factor  
634 3 is attributed to secondary oxidation products because of the dominant species in this  
635 source profile is malic acid (69%). Malic acid is a secondary oxidation product as  
636 described above (see section 3.3.8).

637         Factor 4 was abundantly loaded by fluoranthene (representative PAH) (79%),  
638  $\text{C}_{30}\alpha\beta$  (representative hopane) (64%) and  $\text{C}_{29}$  (representative *n*-alkane) (50%), implying  
639 their origination from the fossil fuel combustion. It should be noted that *n*-alkanes also  
640 showed a loading in factor 1, suggesting that *n*-alkanes are partly associated with  
641 biomass burning. PAHs can be emitted from fossil fuel combustion and biomass  
642 burning activities. However, we observed that PAHs are mainly derived from fossil fuel  
643 combustion in Nanjing (see section 3.3.4). Furthermore, *n*-alkanes can be originated  
644 from fossil fuel combustion and higher plant waxes, whereas fossil fuel was the  
645 dominant source for *n*-alkanes in Nanjing aerosols (see section 3.3.1). Hopanes are  
646 emitted from the vehicular exhaust as well as coal burning. Low-quality coals are  
647 extensively used in urban and rural areas in China for cooking and house heating. Many  
648 power plants in Chinese cities also used a large amount of coal for producing energy.

649 Running vehicles have also increased severely in China, which can emit hopanes in the  
650 atmosphere. Factor 5 is dominated by di-(2-ethylhexyl) phthalate (DEHP) (63%)  
651 followed by terephthalic acid (35%), which should be associated with plastic burning.  
652 Terephthalic acid is a secondary oxidation product and also can be emitted from the  
653 open burning of plastics as discussed above.

654 PMF results can be further utilized to calculate the relative contributions of  
655 sources to the amount of ambient OC or PM<sub>2.5</sub> using a multiple linear regression  
656 between the isolated factor strengths and measured OC or PM<sub>2.5</sub> (Song et al., 2001).  
657 Results of this analysis are presented in Figure 9 whereas source contributions were  
658 calculated to PM<sub>2.5</sub>. Fossil fuel combustion was the dominant source (28.7%)  
659 considering the primary source, followed by emissions of biomass burning (17.1%), soil  
660 dust (14.5%), and plastic burning (6.83%) during this study period. However, secondary  
661 oxidation products showed the highest contribution (32.9%) to PM<sub>2.5</sub> in Nanjing  
662 probably due to long-range atmospheric transport. These results indicate that fossil fuel  
663 combustion is an important contributor to Nanjing aerosol during winter. Wang and  
664 Kawamura (2005) reported that fossil fuel combustion (52%) was the largest  
665 contributor to total organics followed by biomass burning (14%) and SOA (10%) from  
666 Nanjing, whereas coal combustion was found to contribute to PM<sub>2.1</sub> by 39.5% in 2010  
667 in Nanjing (Chen et al., 2015). Gao et al. (2013) pointed out that coal combustion was  
668 the dominant (58%) contributor to PM<sub>2.5</sub> followed by biomass burning (31%), and  
669 vehicular emissions (11%) in the Pearl River Delta region (two urban, two suburban  
670 and two rural sites) while sample was collected in 2009. The comparison of current  
671 results with previous studies implies that the contribution of fossil fuel combustion and  
672 biomass burning emission in China decreased significantly in the past decade.

673 However, pollution levels in China are still severe compared to those in the National  
674 and WHO standards as discussed above (section 1).

#### 675 4. Summary and Conclusions

676 We collected PM<sub>2.5</sub> aerosol samples during winter from Nanjing, an urban area  
677 located in east China in 2014 to 2015. Twelve organic compound classes were  
678 identified in the aerosol samples with *n*-alkanes as the dominant compound class,  
679 followed by fatty acids, PAHs, anhydro-sugars, fatty alcohols, and phthalate esters. The  
680 concentrations of organic compounds were slightly higher at night samples than day  
681 samples because of the lower PBLH and more emissions from heavy-duty trucks as  
682 well as coal and biomass burning in nighttime.

683 The molecular signature of *n*-alkanes with a weak odd-carbon number  
684 predominance and maxima of C<sub>29</sub> (ave. CPI: 1.18) implies their significant emission  
685 from fossil fuels combustion. On the contrary, microbial and plant waxes are the major  
686 source of fatty acids and fatty alcohols in this study. Fatty alcohols are also significantly  
687 emitted from biomass burning. The biomass burning tracer, levoglucosan was the  
688 dominant species among the detected compounds. Levoglucosan and other biomass  
689 burning tracers are mainly originated from house cooking and heating during study  
690 period. Concentrations of secondary oxidation products, including aromatic acids and  
691 polyacids, maximized during nighttime possibly because of the influence of NO<sub>x</sub> or  
692 long-range atmospheric transport.

693 The diagnostic ratios of the tracer compounds suggest that coal burning is the  
694 major source of PAHs while hopanes are abundantly emitted from traffic emissions  
695 over Nanjing atmosphere. PMF analysis demonstrated that fossil fuel combustion is an  
696 important source (28.7%) in Nanjing winter aerosols. The concentrations of organic  
697 tracers in this study are lower than previously reported Nanjing aerosols collected in



698 2004-2005. Air quality in Nanjing may have been improved for last decade. However,  
699 fossil fuel combustion emissions have not been decreased **satisfactorily** and still control  
700 the compositions of wintertime OAs in Nanjing atmosphere.

701

## 702 **Acknowledgements**

703 We acknowledge the Natural Scientific Foundation of China (Grant No. 91643109 and  
704 41603104) and Japan Society for the Promotion of Science (Grant No. 24221001) for  
705 financial support.

706

## 707 **References**

- 708 Albrecht, B. A.: Aerosols, Cloud Microphysics, and Fractional Cloudiness, *Science*,  
709 245(4923), 1227–1230. <https://doi.org/10.1126/science.245.4923.1227>, 1989.
- 710 Asa-Awuku, A., Moore, R. H., Nenes, A., Bahreini, R., Holloway, J. S., Brock, C. A.,  
711 Middlebrook, A. M., Ryerson, T. B., Jimenez, J. L., Decarlo, P. F., Hecobian, A.,  
712 Weber, R. J., Stickel, R., Tanner, D. J., and Huey, L. G.: Airborne cloud  
713 condensation nuclei measurements during the 2006 Texas Air Quality Study, *J.*  
714 *Geophys. Res.- Atmos.*, 116(11), doi:10.1029/2010JD014874, 2011.
- 715 Athanasopoulou, E., Tombrou, M., Russell, A. G., Karanasiou, A., Eleftheriadis, K., and  
716 Dandou, A.: Implementation of road and soil dust emission parameterizations in the  
717 aerosol model CAMx: Applications over the greater Athens urban area affected by  
718 natural sources, *J. Geophys. Res.*, 115(D17301), doi:10.1029/2009JD013207., 2010.
- 719 Bi, X., Sheng, G., Peng, P., Chen, Y., Zhang, Z., and Fu, J.: Distribution of particulate-  
720 and vapor-phase *n*-alkanes and polycyclic aromatic hydrocarbons in urban  
721 atmosphere of Guangzhou, China, *Atmos. Environ.*, 37(2), 289–298, 2003.
- 722 Bi, X., Sheng, G., Peng, P., Chen, Y., and Fu, J.: Size distribution of *n*-alkanes and  
723 polycyclic aromatic hydrocarbons (PAHs) in urban and rural atmospheres of  
724 Guangzhou, China, *Atmos. Environ.*, 39(3), 477–487., 2005.
- 725 Boreddy, S. K. R., Haque, M. M., and Kawamura, K.: Long-term (2001-2012) trends of  
726 carbonaceous aerosols from a remote island in the western North Pacific: An outflow  
727 region of Asian pollutants, *Atmos. Chem. Phys.*, 18(2), 1291–1306, doi:10.5194/acp-  
728 18-1291-2018, 2018.
- 729 Brahney, J., Ballantyne, A. P., Sievers, C., and Neff, J. C.: Increasing Ca<sup>2+</sup> deposition  
730 in the western US: The role of mineral aerosols, *Aeolian Res.*, 10, 77–87, 2013.
- 731 Buzcu, B., Fraser, M. P., Kulkarni, P., and Chellam, S.: Source identification and  
732 apportionment of fine particulate matter in Houston, TX, using positive matrix  
733 factorization, *Environ. Eng. Sci.*, 20(6), 533–545, 2003.
- 734 **Chang, Y., Zhang, Y., Tian, C., Zhang, S., Ma, X., Cao, F., Liu, X., Zhang, W., Kuhn,**  
735 **T., and Lehmann, M. F.: Nitrogen isotope fractionation during gas-particle**  
736 **conversion of NO<sub>x</sub> to NO<sub>3</sub><sup>-</sup> in the atmosphere – implications for isotope-based NO<sub>x</sub>**  
737 **source apportionment, *Atmos. Chem. Phys.*, 18, 11647-11661, [https://doi.org/](https://doi.org/10.5194/acp-18-11647-2018)**  
738 **[10.5194/acp-18-11647-2018](https://doi.org/10.5194/acp-18-11647-2018), 2018.**

- 739 Chen, P., Wang, T., Hu, X., and Xie, M: Chemical Mass Balance Source  
740 Apportionment of Size-Fractionated Particulate Matter in Nanjing, China, *Aerosol*  
741 *and Air Quality Research*, 15, 1855–1867, 2015.
- 742 Chung, S. H., and Seinfeld, J. H.: Global distribution and climate forcing of  
743 carbonaceous aerosols, *J. Geophys. Res.- Atmos.*, 107((D19)), 4407,  
744 doi:10.1029/2001JD001397, 2002.
- 745 Chung, C. E., Ramanathan, V., and Decremer, D.: Observationally constrained  
746 estimates of carbonaceous aerosol radiative forcing, *PNAS*, 109, 11624–11629; 109,  
747 11624–11629, doi:10.1073/pnas.1203707109, 2012.
- 748 Claeys, M., Graham, B., Vas, G., Wang, W., Vermeylen, R., Pashynska, V., Cafmeyer,  
749 J., Guyon, P., Andreae, M. O., Artaxo, P., and Maenhaut, W.: Formation of  
750 secondary organic aerosols through photooxidation of isoprene, *Science (80-. )*,  
751 303(5661), 1173–1176, 2004.
- 752 Cooke, W. F., Liousse, C., Cachier, H., and Feichter, J.: Construction of a 1 degrees x 1  
753 degrees fossil fuel emission data set for carbonaceous aerosol and implementation  
754 and radiative impact in the ECHAM4 model, *J. Geophys. Res.- Atmos.*, 104(D18),  
755 22137–22162, 1999.
- 756 Ding, X., Wang, X. M., Xie, Z. Q., Xiang, C. H., Mai, B. X., Sun, L. G., Zheng, M.,  
757 Sheng, G. Y., Fu, J. M., and Pöschl, U.: Atmospheric polycyclic aromatic  
758 hydrocarbons observed over the North Pacific Ocean and the Arctic area: Spatial  
759 distribution and source identification, *Atmos. Environ.*, 41, 2061–2072, 2007.
- 760 Ding, L. C., Fu, K., Wang, D. K. W., Dann, T., and Austin, C. C.: A new direct thermal  
761 desorption-GC/MS method: Organic speciation of ambient particulate matter  
762 collected in Golden, BC, *Atmos. Environ.*, 43, 4894–4902, 2009.
- 763 Ding, X., Wang, X., Xie, Z., Zhang, Z., and Sun, L.: Impacts of siberian biomass  
764 burning on organic aerosols over the north pacific ocean and the arctic: Primary and  
765 secondary organic tracers, *Environ. Sci. Technol.*, 47(7), 3149–3157, 2013.
- 766 Dusek, U., Frank, G. P., Hildebrandt, L., Curtius, J., Schneider, J., Walter, S., Chand,  
767 D., Drewnick, F., Hings, S., Jung, D., Borrmann, S., and Andreae, M. O.: Size  
768 matters more than chemistry for cloud-nucleating ability of aerosol particles, *Science*  
769 (80-. ), 312(5778), 1375–1378, 2006.
- 770 Elbert, W., Taylor, P. E., Andreae, M. O., and Pöschl, U.: Contribution of fungi to  
771 primary biogenic aerosols in the atmosphere: wet and dry discharged spores,  
772 carbohydrates, and inorganic ions, *Atmos. Chem. Phys.*, 7, 4569–4588, 2007.
- 773 Finlayson-Pitts, B. J., and Pitts Jr, J. N.: *Chemistry of the Upper and Lower*  
774 *Atmosphere*, Academic Press, San Diego, 2000.
- 775 Fine, P. M., Chakrabarti, B., Krudysz, M., Schauer, J. J., and Sioutas, C.: Diurnal  
776 variations of individual organic compound constituents of ultrafine and accumulation  
777 mode particulate matter in the Los Angeles basin, *Environ. Sci. Technol.*, 38(5),  
778 1296–1304, 2004.
- 779 Fu, P. Q., Kawamura, K., Okuzawa, K., Aggarwal, S. G., Wang, G., Kanaya, Y., and  
780 Wang, Z.: Organic molecular compositions and temporal variations of summertime  
781 mountain aerosols over Mt. Tai, North China Plain, *J. Geophys. Res.-Atmos.*, 113,  
782 D1910, doi:10.1029/2008JD009900, 2008.
- 783 Fu, P. Q., Kawamura, K., and Barrie, L. A.: Photochemical and other sources of organic  
784 compounds in the Canadian high Arctic aerosol pollution during winter-spring,  
785 *Environ. Sci. Technol.*, 43(2), 286–292, 2009.
- 786 Fu, P. Q., Kawamura, K., Pavuluri, C. M., Swaminathan, T., and Chen, J.: Molecular  
787 characterization of urban organic aerosol in tropical India: contributions of primary  
788 emissions and secondary photooxidation, *Atmos. Chem. Phys.*, 10(6), 2663–2689,  
789 2010.
- 790 Gao, B., Guo, H., Wang, X. M., Zhao, X. Y., Ling, Z. H., and Zhang, Z.: Tracer-based

791 source apportionment of polycyclic aromatic hydrocarbons in PM<sub>2.5</sub> in Guangzhou  
792 southern China, using positive matrix factorization (PMF). *Environ. Sci. Poll. Res.*  
793 *Int.*, 20, 2398–2409, 2013.

794 Graham, B., Guyon, P., Taylor, P. E., Artaxo, P., Maenhaut, W., Glovsky, M. M.,  
795 Flagan, R. C., and Andreae, M. O.: Organic compounds present in the natural  
796 Amazonian aerosol: Characterization by gas chromatography-mass spectrometry, *J.*  
797 *Geophys. Res.-Atmos.*, 108, D24, 4766, doi:10.1029/2003JD003990, 2003.

798 Grimmer, G., Jacob, J., and Noujack, K. W.: Profile of the polycyclic aromatic  
799 hydrocarbons from lubricating oils. Inventory by GC/MS-PAH in environmental  
800 materials, part 1., *Fresenius Zeitschrift fur Anal. Chemie*, 314, 13–19., 1983.

801 Guo, Z. G., Sheng, L. F., Feng, J. L., and Fang, M.: Seasonal variation of solvent  
802 extractable organic compounds in the aerosols in Qingdao, China, *Atmos. Environ.*,  
803 37(13), 1825–1834, doi:10.1016/S1352-2310(03)00064-5, 2003.

804 Haque, M. M., Kawamura, K., and Kim, Y.: Seasonal variations of biogenic secondary  
805 organic aerosol tracers in ambient aerosols from Alaska, *Atmos. Environ.*, 130, 95–  
806 104, doi:10.1016/j.atmosenv.2015.09.075, 2016.

807 Hays, M. D., Fine, P. M., Geron, C. D., Kleeman, M. J., and Gullett, B. K.: Open  
808 burning of agricultural biomass: Physical and chemical properties of particle-phase  
809 emissions, *Atmos. Environ.*, 39(36), 6747–6764, 2005.

810 He, K., Zhao, Q., Ma, Y., Duan, F., Yang, F., Shi, Z., and Chen, G: Spatial and seasonal  
811 variability of PM<sub>2.5</sub> acidity at two Chinese megacities: insights into the formation of  
812 secondary inorganic aerosols, *Atmos. Chem. Phys.*, 12, 1377–1395, doi:10.5194/acp-  
813 12-1377-2012, 2012.

814 Henze, D. K., Seinfeld, J. H., Ng, N. L., Kroll, J. H., Fu, T. M., Jacob, D. J., and Heald,  
815 C. L.: Global modeling of secondary organic aerosol formation from aromatic  
816 hydrocarbons: high- vs. low-yield pathways, *Atmos. Chem. Phys.*, 8(9), 2405–2420,  
817 doi:10.5194/acp-8-2405-2008, 2008.

818 Huebert, B. J., Bates, T., Russell, P. B., Shi, G. Y., Kim, Y. J., Kawamura, K.,  
819 Carmichael, G., and Nakajima, T.: An overview of ACE-Asia: Strategies for  
820 quantifying the relationships between Asian aerosols and their climatic impacts, *J.*  
821 *Geophys. Res.-Atmos.*, 108(D23), doi:10.1029/2003JD003550, 2003.

822 Jacobson, M. Z.: Global direct radiative forcing due to multicomponent anthropogenic  
823 and natural aerosols, *J. Geophys. Res.- Atmos.*, 106(D2), 1551–1568,  
824 doi:10.1029/2000JD900514, 2001.

825 Jaekels, J. M., Bae, M. S., and Schauer, J. J.: Positive matrix factorization (PMF)  
826 analysis of molecular marker measurements to quantify the sources of organic  
827 aerosols, *Environ. Sci. Technol.*, 41(16), 5763–5769, 2007.

828 Jia, Y. L., Clements, A. L., and Fraser, M. P.: Saccharide composition in atmospheric  
829 particulate matter in the southwest US and estimates of source contributions, *J.*  
830 *Aerosol Sci.*, 41(1), 62–73, doi:10.1016/j.jaerosci.2009.08.005, 2010.

831 Kanakidou, M., Seinfeld, J. H., Pandis, S. N., Barnes, I., Dentener, F. J., Facchini, M.  
832 C., Van Dingenen, R., Ervens, B., Nenes, A., Nielsen, C. J., Swietlicki, E., Putaud, J.  
833 P., Balkanski, Y., Fuzzi, S., Horth, J., Moortgat, G. K., Winterhalter, R., Myhre, C.  
834 E. L., Tsigaridis, K., Vignati, E., Stephanou, E. G., and Wilson, J.: Organic aerosol  
835 and global climate modelling: a review, *Atmos. Chem. Phys.*, 5, 1053–1123, 2005.

836 Kawamura, K., and Gagosian, R. B.: Implications of  $\omega$ -oxocarboxylic acids in the  
837 remote marine atmosphere for photo-oxidation of unsaturated fatty acids, *Nature*,  
838 325, 330–332, 1987.

839 Kawamura, K., and Ikushima, K.: Seasonal changes in the distribution of dicarboxylic  
840 acids in the urban atmosphere, *Environ. Sci. Technol.*, 27(10), 2227–2235, 1993.

841 Kawamura, K., Kosaka, M., and Sempéré, R.: Distributions and seasonal changes of  
842 hydrocarbons in urban aerosols and rainwaters, *Chikyukagaku (Geochemistry)*, 29,  
843 1–15, 1995.

844 Kawamura, K., Steinberg, S., and Kaplan, I. R.: Homologous series of C<sub>1</sub>-C<sub>10</sub>  
845 monocarboxylic acids and C<sub>1</sub>-C<sub>6</sub> carbonyls in Los Angeles air and motor vehicle  
846 exhausts, *Atmos. Environ.*, 34(24), 4175–4191, 2000.

847 Kawamura, K., Ishimura, Y., and Yamazaki, K.: Four years' observations of terrestrial

lipid class compounds in marine aerosols from the western North Pacific, *Glob. Biogeochem. Cycles*, 17, 1003(1), doi:10.1029/2001GB001810, 2003.

Kendrick, C. M., Koonce, P., and George, L. A.: Diurnal and seasonal variations of NO, NO<sub>2</sub> and PM<sub>2.5</sub> mass as a function of traffic volumes alongside an urban arterial, *Atmos. Environ.*, 122, 133–141, doi:10.1016/j.atmosenv.2015.09.019, 2015.

Kerimray, A., Luis, R.-S., Torkmahalleh, M. A., Hopke, P. K., Gallachóir, B. P. Ó.: Coal use for residential heating: Patterns, health implications and lessons learned, *Ener. Sus. Develop.*, 40, 19–30, 2017.

Kleeman, M. J., Riddle, S. G., and Jakober, C. A.: Size distribution of particle-phase molecular markers during a severe winter pollution episode, *Environ. Sci. Technol.*, 42, 6469–6475, 2008.

Kolattukudy, P. E.: *Chemistry and Biochemistry of Natural Waxes*, Elsevier, New York., 1976.

Kunwar, B., and Kawamura, K.: One-year observations of carbonaceous and nitrogenous components and major ions in the aerosols from subtropical Okinawa Island, an outflow region of Asian dusts, *Atmos. Chem. Phys.*, 14, 1819–1836, doi:https://doi.org/10.5194/acp-14-1819-2014, 2014.

Li, M., Zhang, Q., Kurokawa, J.-I., Woo, J.-H., He, K., Lu, Z., Ohara, T., Song, Y., Streets, D. G., Carmichael, G. R., Cheng, Y., Hong, C., Huo, H., Jiang, X., Kang, S., Liu, F., Su, H., and Zheng, B.: MIX: a mosaic Asian anthropogenic emission inventory under the international collaboration framework of the MICS-Asia and HTAP, *Atmos. Chem. Phys.*, 17, 935–963, 2017.

Liu, J., Han, Y., Tang, X., Zhu, J., and Zhu, T.: Estimating adult mortality attributable to PM<sub>2.5</sub> exposure in China with assimilated PM<sub>2.5</sub> concentrations based on a ground monitoring network. *Sci. Total Environ.*, 568, 1253–1262. doi:10.1016/j.scitotenv.2016.05.165, 2016.

Lohmann, U., Feichter, J., Penner, J., and Leaitch, R.: Indirect effect of sulfate and carbonaceous aerosols: A mechanistic treatment, *J. Geophys. Res.- Atmos.*, 105(D10), 12193–12206, doi:10.1029/1999JD901199, 2000.

Matsunaga, S., Kawamura, K., Nakatsuka, T., and Ohkouchi, N.: Preliminary study on laboratory photochemical formation of low molecular weight dicarboxylic acids from unsaturated fatty acid (oleic acid), *Res. Org. Geochem.*, 14, 19–25, 1999.

Ma, Z., Hu, X., Sayer, A. M., Levy, R., Zhang, Q., Xue, Y., Tong, S., Bi, J., Huang, L., Liu, Y.: Satellite-based spatiotemporal trends in PM<sub>2.5</sub> concentrations: China, 2004–2013, *Environ. Health Perspect.*, 124, 184–192, <http://dx.doi.org/10.1289/ehp.1409481>, 2016.

Medeiros, P. M., Conte, M. H., Weber, J. C. and Simoneit, B. R. T.: Sugars as source indicators of biogenic organic carbon in aerosols collected above the Howland Experimental Forest, Maine, *Atmos. Environ.*, 40(9), 1694–1705, 2006.

Medeiros, P. M., and Simoneit, B. R. T.: Source profiles of organic compounds emitted upon combustion of green vegetation from temperate climate forests, *Environ. Sci. Technol.*, 42(22), 8310–8316, 2008.

Mochida, M., Kitamori, Y., Kawamura, K., Nojiri, Y., and Suzuki, K.: Fatty acids in the marine atmosphere: Factors governing their concentrations and evaluation of organic films on sea-salt particles, *J. Geophys. Res.-Atmos.*, 107, D17, 4325, doi:10.1029/2001JD001278, 2002.

Mochida, M., Kawamura, K., Fu, P., and Takemura, T.: Seasonal variation of levoglucosan in aerosols over the western North Pacific and its assessment as a biomass-burning tracer, *Atmos. Environ.*, 44, 3511–3518, 2010.

Mochizuki, T., Miyazaki, Y., Ono, K., Wada, R., Takahashi, Y., Saigusa, N., Kawamura, K., and Tani, A.: Emissions of biogenic volatile organic compounds and subsequent formation of secondary organic aerosols in a *Larix kaempferi* forest, *Atmos. Chem. Phys.*, 15(20), 12029–12041, doi:10.5194/acp-15-12029-2015, 2015.

O’Dowd, C. D., Facchini, M. C., Cavalli, F., Ceburnis, D., Mircea, M., Decesari, S.,

902 Fuzzi, S., Yoon, Y. J., and Putaud, J. P.: Biogenically driven organic contribution to  
903 marine aerosol, *Nature*, 431, 676–680, 2004.

904 Offenberg, J., Lewis, C., Lewandowski, M., Jaoui, M., Kleindienst, T. E., and Edney, E.  
905 O.: Contributions of Toluene and  $\alpha$ -Pinene to SOA formed in an irradiated toluene/ $\alpha$ -  
906 Pinene/NOx/air mixture: Comparison of results using  $^{14}\text{C}$  content and SOA organic  
907 tracer methods, *Environ. Sci. Tec.*, 41, 3972–3976, 2007.

908 Ohura, T., Amagai, T., Fusaya, M., and Matsushita, H.: Polycyclic Aromatic  
909 Hydrocarbons in Indoor and Outdoor Environments and Factors Affecting Their  
910 Concentrations, *Environ. Sci. Technol.*, 38(1), 77–83, doi:10.1021/es030512o, 2004.

911 Oliveira, C., Pio, C., Alves, C., Evtugina, M., Santos, P., Goncalves, V., Nunes, T.,  
912 Silvestre, A. J. D., Palmgren, F., Wahlin, P., and Harrad, S.: Seasonal distribution of  
913 polar organic compounds in the urban atmosphere of two large cities from the North  
914 and South of Europe, *Atmos. Environ.*, 41, 5555–5570, 2007.

915 Oros, D. R., and Simoneit, B. R. T.: Identification and emission rates of molecular  
916 tracers in coal smoke particulate matter, *Fuel*, 79(5), 515–536, doi:10.1016/S0016-  
917 2361(99)00153-2, 2000.

918 Paatero, J.: Least squares formulation of robust non-negative factor analysis., *Chemom.*  
919 *Andin.*, 37(1), 23–35, 1997.

920 Paatero, P., and Tapper, U.: Positive Matrix Factorization - A Nonnegative Factor  
921 Model With Optimal Utilization of Error-Estimates of Data Values, *Environmetrics*,  
922 5(2), 111–126, doi:10.1002/env.3170050203, 1994.

923 Pani, S. K., Lee, C. T., Chou, C. C. K., Shimada, K., Hatakeyama, S., Takami, A.,  
924 Wang, S. H., and Lin, N. H.: Chemical Characterization of Wintertime Aerosols over  
925 Islands and Mountains in East Asia: Impacts of the Continental Asian Outflow,  
926 *Aerosol Air Qual. Res.*, 17, 3006–3036, 2017.

927 Pope, C. A., Ezzati, M., and Dockery, D. W.: Fine-particulate air pollution and life  
928 expectancy in the United States, *N. Engl. J. Med.*, 360, 376–386, 2009.

929 Ram, K., Sarin, M. M., and Hegde, P.: Atmospheric abundances of primary and  
930 secondary carbonaceous species at two high-altitude sites in India: Sources and  
931 temporal variability, *Atmos. Environ.*, 42, 6785–6796, 2008.

932 Ramírez, N., Cuadras, A., Rovira, E., Marc e, R.M., and Borruel, F.: Risk assessment  
933 related to atmospheric polycyclic aromatic hydrocarbons in gas and particle phases  
934 near industrial sites, *Environ. Heal. Perspect.*, 119(8), 1110–1116, 2011.

935 Riipinen, I., Yli-Juuti, T., Pierce, J.R., Petaja, T., Worsnop, D.R., Kulmala, M., and  
936 Donahue, N. M.: The contribution of organics to atmospheric nanoparticle growth,  
937 *Nat. Geosci.*, 5, 453–458., 2012.

938 Rogge, W. F., Mazurek, M. A., Hildemann, L. M., Cass, G. R., and Simoneit, B. R. T.:  
939 Quantification of urban organic aerosols at a molecular level: Identification,  
940 abundance and seasonal variation, *Atmos. Environ., Part A*, 27(8), 1309–1330,  
941 1993a.

942 Rogge, W. F., Hildemann, L. M., Mazurek, M. A., Cass, G. R., and Simoneit, B. R. T.:  
943 Sources of Fine Organic Aerosol. 2. Noncatalyst and Catalyst-Equipped Automobiles  
944 and Heavy-Duty Diesel Trucks, *Environ. Sci. Technol.*, 27(4), 636–651,  
945 doi:10.1021/es00041a007, 1993b.

946 Saarikoski, S., Timonen, H., Saarnio, K., Aurela, M., Jrv, L., Keronen, P., Kerminen, V.  
947 M., and Hillamo, R.: Sources of organic carbon in fine particulate matter in northern  
948 European urban air, *Atmos. Chem. Phys.*, 8, 6281–6295, 2008.

949 Salma, I., Németh, Z., Weidinger, T., Maenhaut, W., Claeys, M., Molnár, M., Major,  
950 I., Ajtai, T., Utry, N., and Bozóki, Z.: Source apportionment of carbonaceous  
951 chemical species to fossil fuel combustion, biomass burning and biogenic emissions

952 by a coupled radiocarbon–levoglucosan marker method, *Atmos. Chem. Phys.*, (17),  
953 13767–13781, 2017.

954 Sandradewi, J., Prevot, A.S.H., Weingartner, E., Schmidhauser, R., Gysel, M., and  
955 Baltensperger, U.: A study of wood burning and traffic aerosols in an Alpine valley  
956 using a multi-wavelength Aethalometer, *Atmos. Environ.*, 42, 101–112, 2008.

957 Seinfeld, J. H., and Pandis, S. N.: *Atmospheric Chemistry and Physics: From Air*  
958 *Pollution to Climate Change*, John Wiley & Sons, New York, 2nd edition, 1232 pp.,  
959 ISBN-13: 978-0-471-72018-8, 2006.

960 Shen, G. F., Yuan, S. Y., Xie, Y., Xia, S. J., Li L., Yao, Y. K., Qiao, Y. Z., Zhang, J.,  
961 Zhao, Q. Y., Ding, A. J., Li, B., and Wu, H. S: *Ambient levels and temporal*  
962 *variations of PM<sub>2.5</sub> and PM<sub>10</sub> at a residential site in the mega-city, Nanjing, in the*  
963 *western Yangtze River Delta, China, J. Environ. Sci. Health, Part A 49, 171–178,*  
964 *2014.*

965 Sidhu, S., Gullett, B., Striebich, R., Klosterman, J., Contreras, J., and DeVito, M.:  
966 Endocrine disrupting chemical emissions from combustion sources: diesel particulate  
967 emissions and domestic waste open burn emissions, *Atmos. Environ.*, 39(5), 801–  
968 811, 2005.

969 Simoneit, B. R. T.: The organic chemistry of marine sediments. In *Chemical*  
970 *Oceanography*, Riley J. P., Chester, R., Eds.; Academic Press:, New York., 1978.

971 Simoneit, B. R. T., Cardoso, J. N., and Robinson, N.: An assessment of terrestrial  
972 higher molecular weight lipid compounds in aerosol particulate matter over the south  
973 Atlantic from about 30–70° S, *Chemosphere*, 23(4), 447–465, 1991a.

974 Simoneit, B. R. T., Sheng, G. Y., Chen, X. J., Fu, J. M., Zhang, J., and Xu, Y. P.:  
975 Molecular marker study of extractable organic-matter in aerosols from urban areas of  
976 China, *Atmos. Environ., Part A*, 25(10), 2111–2129, 1991b.

977 Simoneit, B. R. T., Schauer, J. J., Nolte, C. G., Oros, D. R., Elias, V. O., Fraser, M. P.,  
978 Rogge, W. F., and Cass, G. R.: Levoglucosan, a tracer for cellulose in biomass  
979 burning and atmospheric particles, *Atmos. Environ.*, 33(2), 173–182,  
980 doi:10.1016/S1352-2310(98)00145-9, 1999.

981 Simoneit, B. R. T.: Biomass burning—a review of organic tracers for smoke from  
982 incomplete combustion, *Appl. Geochem.*, 17, 129–162, 2002.

983 Simoneit, B. R. T., Elias, V. O., Kobayashi, M., Kawamura, K., Rushdi, A. I.,  
984 Medeiros, P. M., Rogge, W. F., and Didyk, B. M.: Sugars-dominant water-soluble  
985 organic compounds in soils and characterization as tracers in atmospheric particulate  
986 matter, *Environ. Sci. Technol.*, 38(22), 5939–5949, 2004a.

987 Simoneit, B. R. T., Kobayashi, M., Mochida, M., Kawamura, K., and Huebert, B. J.:  
988 Aerosol particles collected on aircraft flights over the northwestern Pacific region  
989 during the ACE-Asia campaign: Composition and major sources of the organic  
990 compounds, *J. Geophys. Res.- Atmos.*, 109, D19S0, doi:10.1029/2004JD004565,  
991 2004b.

992 Simoneit, B. R. T., Kobayashi, M., Mochida, M., Kawamura, K., Lee, M., Lim, H. J.,  
993 Turpin, B. J., and Komazaki, Y.: Composition and major sources of organic  
994 compounds of aerosol particulate matter sampled during the ACE-Asia campaign, *J.*  
995 *Geophys. Res.- Atmos.*, 109, D19S1, doi:10.1029/2004JD004598, 2004c.

996 Song, X. H., Polissar, A. V., and Hopke, P. K.: Sources of fine particle composition in  
997 the northeastern US, *Atmos. Environ.*, 35(31), 5277–5286, 2001.

998 Stohl, A., Berg, T., Burkhardt, J. F., Fjærraa, A. M., Forster, C., Herber, A., Hov Lunder,  
999 C., McMillan, W. W., Oltmans, S., Shiobara, M., Simpson, D., Solberg, S., Stebel,  
1000 K., Ström, J., Tørseth, K., Treffeisen, R., Virkkunen, K., and Yttri, K. E.: Arctic

1001 smoke - record high air pollution levels in the European Arctic due to agricultural  
1002 fires in Eastern Europe in spring 2006, *Atmos. Chem. Phys.*, 7, 511–534, 2007.

1003 Teil, M.J., Blanchard, M., and Chevreuil, M.: Atmospheric fate of phthalate esters in an  
1004 urban area (Paris—France), *Sci. Total Environ.*, 354, 212–223, 2006.

1005 Thuren, A., and Larsson, P.: Phthalate esters in the Swedish atmosphere, *Environ. Sci.*  
1006 *Technol.*, 24, 554–559, 1990.

1007 Twomey, S.: The Influence of Pollution on the Shortwave Albedo of Clouds, *J. Atmos.*  
1008 *Sci.*, 34(7), 1149–1152, 1977.

1009 Wang, G., Niu, S., Liu, C., and Wang, L.: Identification of dicarboxylic acids and  
1010 aldehydes of PM<sub>10</sub> and PM<sub>2.5</sub> aerosols in Nanjing, China, *Atmos. Environ.*, 36(12),  
1011 1941–1950, doi:10.1016/S1352-2310(02)00180-2, 2002a.

1012 Wang, G., Huang, L., Gao, S., Gao, S., and Wang, L.: Measurements of PM<sub>10</sub> and PM<sub>2.5</sub>  
1013 in urban area of Nanjing, China and the assessment of pulmonary deposition of  
1014 particle mass, *Chemosphere*, 48(7), 689–695, doi:10.1016/S0045-6535(02)00197-2,  
1015 2002b.

1016 Wang, G., and Kawamura, K.: Molecular characteristics of urban organic aerosols from  
1017 Nanjing: A case study of a mega-city in China, *Environ. Sci. Technol.*, 39(19), 7430–  
1018 7438, 2005.

1019 Wang, G., Kawamura, K., Lee, S., Ho, K. F., and Cao, J. J.: Molecular, seasonal, and  
1020 spatial distributions of organic aerosols from fourteen Chinese cities, *Environ. Sci.*  
1021 *Technol.*, 40(15), 4619–4625, 2006.

1022 Wang, G. H., Kawamura, K., Zhao, X., Li, Q. G., Dai, Z. X., and Niu, H. Y.:  
1023 Identification, abundance and seasonal variation of anthropogenic organic aerosols  
1024 from a mega-city in China, *Atmos. Environ.*, 41(2), 407–416, doi:10.1016/J.Atmosenv.2006.07.033,  
1025 2007a.

1026 Wang, G., Kawamura, K., Hatakeyama, S., Takami, A., Li, H., and Wang, W.: Aircraft  
1027 measurement of organic aerosols over China, *Environ. Sci. Technol.*, 41(9), 3115–  
1028 3120, doi:10.1021/es062601h, 2007b.

1029 Wang, G., Kawamura, K., Xie, M., Hu, S., Gao, S., Cao, J., An, Z., and Wang, Z.: Size-  
1030 distributions of *n*-alkanes, PAHs and hopanes and their sources in the urban,  
1031 mountain and marine atmospheres over East Asia, *Atmos. Chem. Phys.*, 9(22), 8869–  
1032 8882, 2009.

1033 Wang, S., Xing, J., Jang, C., Zhu, Y., Full, J. S., and Hao, J.: Impact Assessment of  
1034 Ammonia Emissions on Inorganic Aerosols in East China Using Response Surface  
1035 Modeling Technique, *Environ. Sci. Technol.*, 45 (21), 9293–9300, 2011.

1036 Weschler, C. J.: Indoor–outdoor relationships for non-polar organic constituents of  
1037 aerosol particles, *Environ. Sci. Technol.*, 18, 648–652, 1984.

1038 Xiao, Q., Ma, Z., Li, S., and Liu, Y.: The Impact of Winter Heating on Air Pollution in  
1039 China, *PLoS ONE* 10(1): e0117311. doi:10.1371/journal.pone.0117311, 2015.

1040 Yang, H., Yu, J. Z., Ho, S. S. H., Xu, J. H., Wu, W. S., Wan, C. H., Wang, X. D.,  
1041 Wang, X. R., and Wang, L. S.: The chemical composition of inorganic and  
1042 carbonaceous materials in PM<sub>2.5</sub> in Nanjing, China, *Atmos. Environ.*, 39(20), 3735–  
1043 3749, 2005.

1044 Yao, X., Lau, A. P. S., Fang, M., Chan, C. K., and Hu, M.: Size distributions and  
1045 formation of ionic species in atmospheric particulate pollutants in Beijing, China: 2 -  
1046 Dicarboxylic acids, *Atmos. Environ.*, 37(21), 3001–3007, doi:10.1016/S1352-  
1047 2310(03)00256-5, 2003.

1048 Yttri, K. E., Dye, C., and Kiss, G.: Ambient aerosol concentrations of sugars and sugar-  
1049 alcohols at four different sites in Norway, *Atmos. Chem. Phys.*, 7, 4267–4279, 2007.

1050 Zhang, R. Y., Suh, I., Zhao, J., Zhang, D., Fortner, E. C., Tie, X. X., Molina, L. T., and

1051 Molina, M. J.: Atmospheric new particle formation enhanced by organic acids,  
1052 Science (80-.), 304(5676), 1487–1490, 2004.

1053 Zhang, Q. J., Beekmann, M., Freney, E., Sellegri, K., Pichon, J. M., Schwarzenboeck,  
1054 A., Colomb, A., Bourrienne, T., Michoud, V., and Borbon, A.: Formation of  
1055 secondary organic aerosol in the Paris pollution plume and its impact on surrounding  
1056 regions, Atmos. Chem. Phys., 15(24), 13973–13992, doi:10.5194/acp-15-13973-  
1057 2015, 2015.

1058 Zhang, Y., and Cao, F.: Fine particulate matter (PM<sub>2.5</sub>) in China at a city level, Sci.  
1059 Rep., 2015 DOI: 10.1038/srep14884.

1060 Zhang, Y.-L., and Kawamura, K.: New directions: Need for better understanding of  
1061 source and formation process of phthalic acid in aerosols as inferred from aircraft  
1062 observations over China, Atmos. Environ., 140, 147–149, 2016.

1063 Zheng, B., Zhang, Q., Zhang, Y., He, K. B., Wang, K., Zheng, G. J., Duan, F. K., Ma,  
1064 Y. L., and Kimoto, T.: Heterogeneous chemistry: a mechanism missing in current  
1065 models to explain secondary inorganic aerosol formation during the January 2013  
1066 haze episode in North China, Atmos. Chem. Phys., 15, 2031–2049, doi:10.5194/acp-  
1067 15-2031-2015, 2015.

1068  
1069  
1070  
1071  
1072  
1073  
1074  
1075  
1076  
1077  
1078  
1079  
1080  
1081  
1082  
1083  
1084  
1085  
1086  
1087  
1088  
1089  
1090  
1091  
1092  
1093  
1094  
1095  
1096  
1097  
1098  
1099  
1100  
1101  
1102  
1103



1104  
1105  
1106  
1107  
1108  
1109  
1110  
1111  
1112  
1113  
1114  
1115  
1116

**Table 1.** Mean concentrations of identified organic compound classes (ng m<sup>-3</sup>) and carbonaceous components (μg m<sup>-3</sup>) in the atmospheric aerosol samples (PM<sub>2.5</sub>) from Nanjing, China.

| Compounds                 | Daytime    |                  |                  |                 | Nighttime  |                  |                  |                 |
|---------------------------|------------|------------------|------------------|-----------------|------------|------------------|------------------|-----------------|
|                           | Mean       | Min <sup>a</sup> | Max <sup>b</sup> | SD <sup>c</sup> | Mean       | Min <sup>a</sup> | Max <sup>b</sup> | SD <sup>c</sup> |
| <i>n</i> -Alkanes         | 177        | 96.1             | 467              | 76.6            | 218        | 74.4             | 500              | 89.3            |
| Plant Wax Alkanes         | 15.5       | 1.12             | 56.2             | 11.2            | 17.6       | 0                | 62.1             | 14.2            |
| Fatty acids               | 66.8       | 14.3             | 254              | 47.9            | 91.3       | 8.57             | 252              | 59.2            |
| Fatty alcohols            | 36.9       | 7.30             | 165              | 29.9            | 43.8       | 4.61             | 129              | 26.7            |
| Anhydro-sugars            | 42.3       | 5.8              | 191              | 40.9            | 71.2       | 5.71             | 367              | 80.1            |
| Sugars                    | 3.44       | 0.78             | 8.89             | 1.75            | 3.43       | 0.59             | 8.49             | 1.81            |
| Phthalate esters          | 13.9       | 2.66             | 40.0             | 10.1            | 16.3       | 3.80             | 51.8             | 11.1            |
| Glycerol and polyacids    | 7.78       | 1.59             | 29.7             | 6.17            | 9.30       | 2.54             | 23.1             | 5.79            |
| Aromatic acids            | 6.70       | 1.53             | 23.1             | 4.69            | 8.37       | 1.99             | 18.4             | 4.83            |
| Lignin and resin products | 2.68       | 0.84             | 6.96             | 1.29            | 3.39       | 0.75             | 14.3             | 2.70            |
| PAHs                      | 54.5       | 29.5             | 106              | 17.8            | 74.8       | 21.7             | 223              | 43.8            |
| Hopanes                   | 3.79       | 0.07             | 20.8             | 4.15            | 4.64       | 0.13             | 26.1             | 5.31            |
| Steranes                  | 2.29       | 1.13             | 9.15             | 1.56            | 2.65       | 1.08             | 11.1             | 1.92            |
| <b>Total organics</b>     | <b>434</b> | <b>163</b>       | <b>1378</b>      | <b>254</b>      | <b>565</b> | <b>126</b>       | <b>1686</b>      | <b>347</b>      |
| OC                        | 18.6       | 8.76             | 40.0             | 8.44            | 19.1       | 2.98             | 40.1             | 8.53            |
| EC                        | 8.25       | 2.41             | 30.3             | 5.46            | 8.86       | 8.86             | 8.86             | 8.86            |
| WSOC                      | 11.7       | 5.52             | 26.6             | 4.68            | 18.1       | 1.51             | 34.4             | 8.92            |
| OC/EC                     | 2.47       | 1.30             | 3.69             | 0.54            | 2.36       | 1.51             | 3.76             | 0.56            |
| WSOC/OC                   | 0.58       | 0.42             | 0.78             | 0.10            | 0.55       | 0.40             | 0.70             | 0.08            |

1117 <sup>a</sup>Minimum, <sup>b</sup>Maximum, <sup>c</sup>Standard deviation

1118  
1119  
1120  
1121  
1122  
1123  
1124  
1125  
1126  
1127  
1128  
1129  
1130  
1131  
1132  
1133  
1134

1135  
1136  
1137  
1138  
1139  
1140  
1141  
1142  
1143  
1144  
1145  
1146

**Table 2.** Comparisons of the average concentrations (ng m<sup>-3</sup>) of organic tracers with those measured during 2004-2005 (Wang and Kawamura, 2005; Wang et al., 2007a<sup>b</sup>) in Nanjing aerosols during winter.

| Compounds                     | This study |            | 2004-2005   |              |
|-------------------------------|------------|------------|-------------|--------------|
|                               | Daytime    | Nighttime  | Daytime     | Nighttime    |
| <i>n</i> -Alkanes             | 177        | 218        | 172         | 278          |
| Plant Wax Alkanes             | 15.5       | 17.6       | 18.8        | 20.6         |
| Fatty acids                   | 66.8       | 91.3       | 245         | 338          |
| Fatty alcohols                | 36.9       | 43.8       | 74.5        | 120          |
| Levogluconan                  | 42.3       | 71.2       | 238         | 297          |
| Sugars                        | 3.44       | 3.43       | 59          | 53           |
| Phthalate esters <sup>b</sup> | 13.9       | 16.3       | 158         | 181          |
| Glycerol and polyacids        | 7.78       | 9.30       | 41.4        | 41.8         |
| Aromatic acids                | 6.70       | 8.37       |             | Not detected |
| Lignin and resin products     | 2.68       | 3.39       | 16.0        | 35.1         |
| PAHs <sup>b</sup>             | 54.5       | 74.8       | 69          | 104          |
| Hopanes <sup>b</sup>          | 3.79       | 4.64       | 7.3         | 9.9          |
| Steranes                      | 2.29       | 2.65       |             | Not detected |
| <b>Total organics</b>         | <b>434</b> | <b>565</b> | <b>1108</b> | <b>1502</b>  |

1147  
1148  
1149  
1150  
1151  
1152  
1153  
1154  
1155  
1156

**Table 3.** Diagnostic concentration ratios of biomarkers for source identification from fossil fuel combustions including gasoline- and diesel cars.

|                                                                 | Present study |           | Gasoline               |                   | Diesel            | Coal                   |
|-----------------------------------------------------------------|---------------|-----------|------------------------|-------------------|-------------------|------------------------|
|                                                                 | Daytime       | Nighttime | Noncatalyst            | Catalyst          |                   |                        |
| IP/BghiP                                                        | 1.26          | 1.19      | 0.22 <sup>a</sup>      |                   | 0.50 <sup>a</sup> | 1.3 <sup>a</sup>       |
| BghiP/Bep                                                       | 1.21          | 1.13      | 2.0 <sup>b</sup>       |                   |                   | 0.8 <sup>b</sup>       |
| Flut/(Flut + IP)                                                | 0.57          | 0.56      | 0.46-0.56 <sup>c</sup> | 0.44 <sup>c</sup> |                   |                        |
| IP/(IP + BghiP)                                                 | 0.56          | 0.54      | 0.18 <sup>c</sup>      |                   | 0.37 <sup>c</sup> | 0.56 <sup>c</sup>      |
| C <sub>29</sub> αβ/C <sub>30</sub> αβ                           | 0.65          | 0.51      | 0.59 <sup>d</sup>      | 0.66 <sup>d</sup> | 0.42 <sup>d</sup> | 0.58-2.0 <sup>e</sup>  |
| C <sub>31</sub> αβS/(C <sub>31</sub> αβS + C <sub>31</sub> αβR) | 0.39          | 0.57      | 0.60 <sup>d</sup>      | 0.62 <sup>d</sup> | 0.50 <sup>d</sup> | 0.05-0.37 <sup>e</sup> |

<sup>a</sup>Grimmer et al., 1983, <sup>b</sup>Ohura et al., 2004, <sup>c</sup>Bi et al., 2005, <sup>d</sup>Rogge et al., 1993a, <sup>e</sup>Oros and Simoneit, 2000

1157  
1158

1159

1160

1161

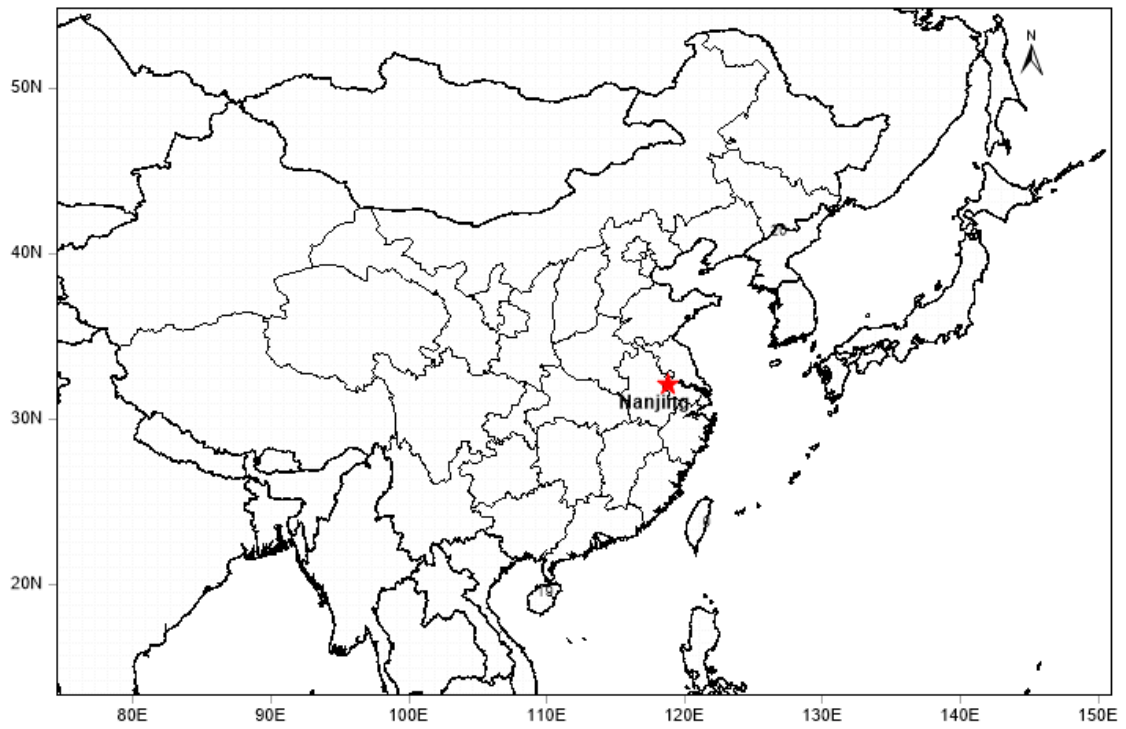

1162

1163 **Figure 1.** A map of sampling site located in Nanjing, China.

1164

1165

1166

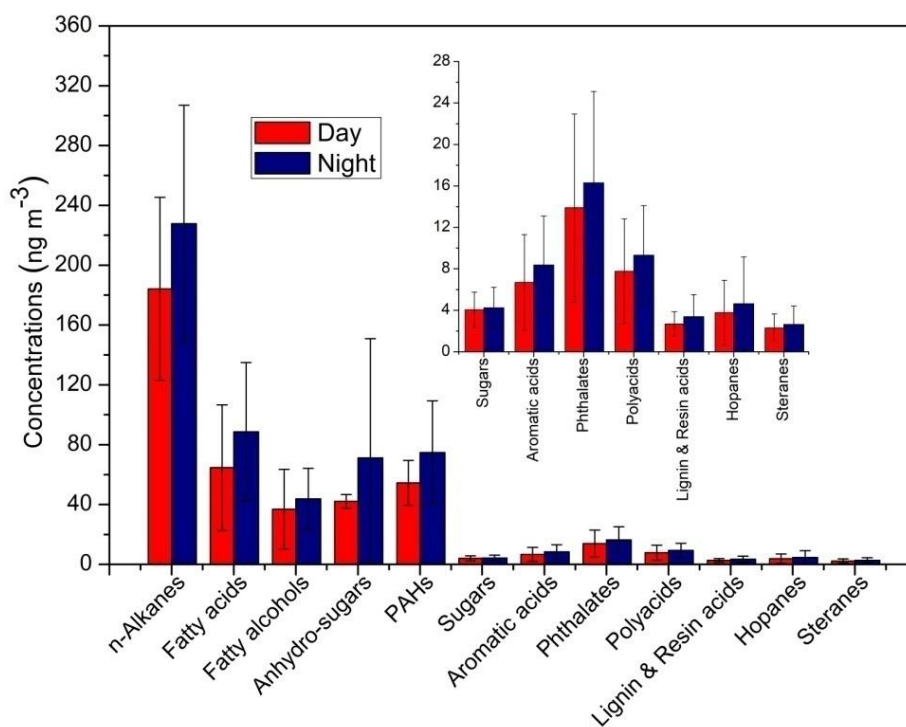

1167

1168

1169

1170

1171

1172

1173

1174

**Figure 2.** Concentrations of organic compound classes detected in the Nanjing aerosols.

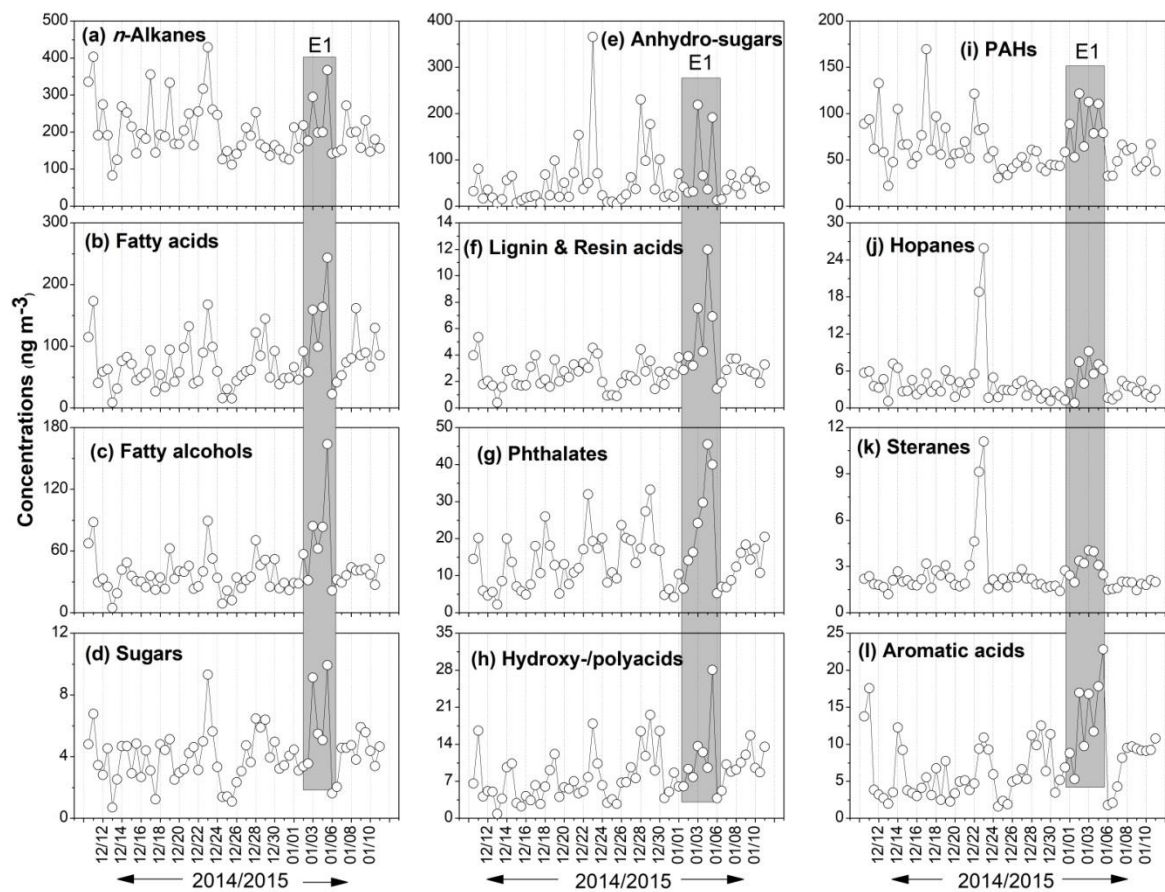

1175

1176 **Figure 3.** Temporal variations in the concentrations of organic compound classes detected in  
 1177 the Nanjing urban aerosols.

1178

1179

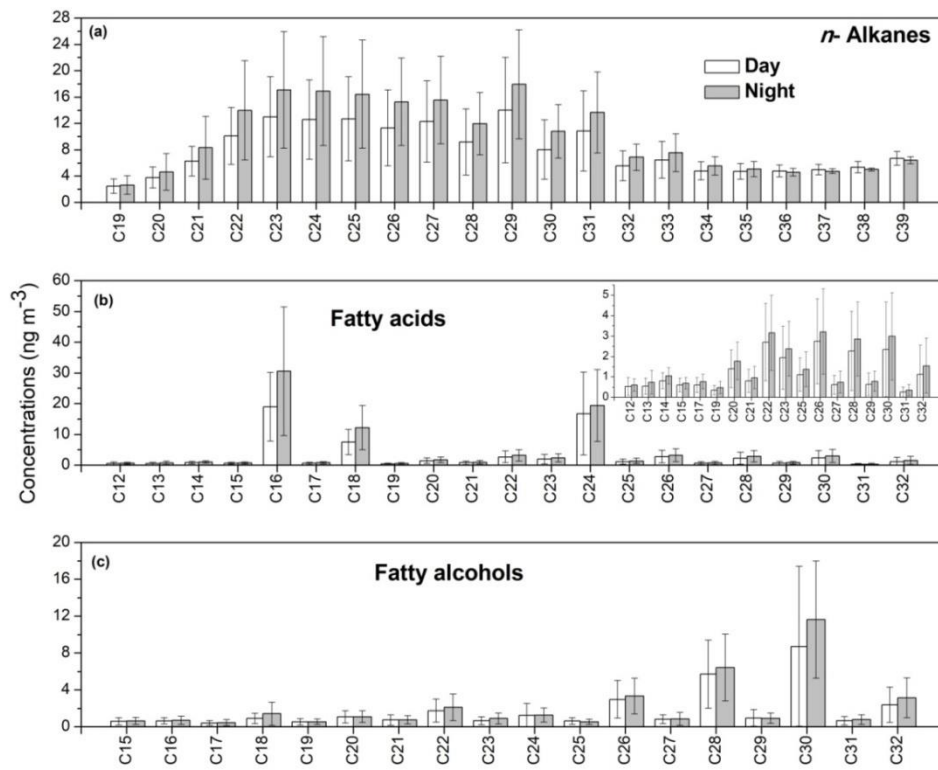

1180

1181

1182

1183

1184

1185

**Figure 4.** Molecular distributions of *n*-alkanes, fatty acids and fatty alcohols in PM<sub>2.5</sub> aerosols collected from Nanjing, China. Inner panel of b represent correspondence carbon of fatty alcohols which concentrations are low.

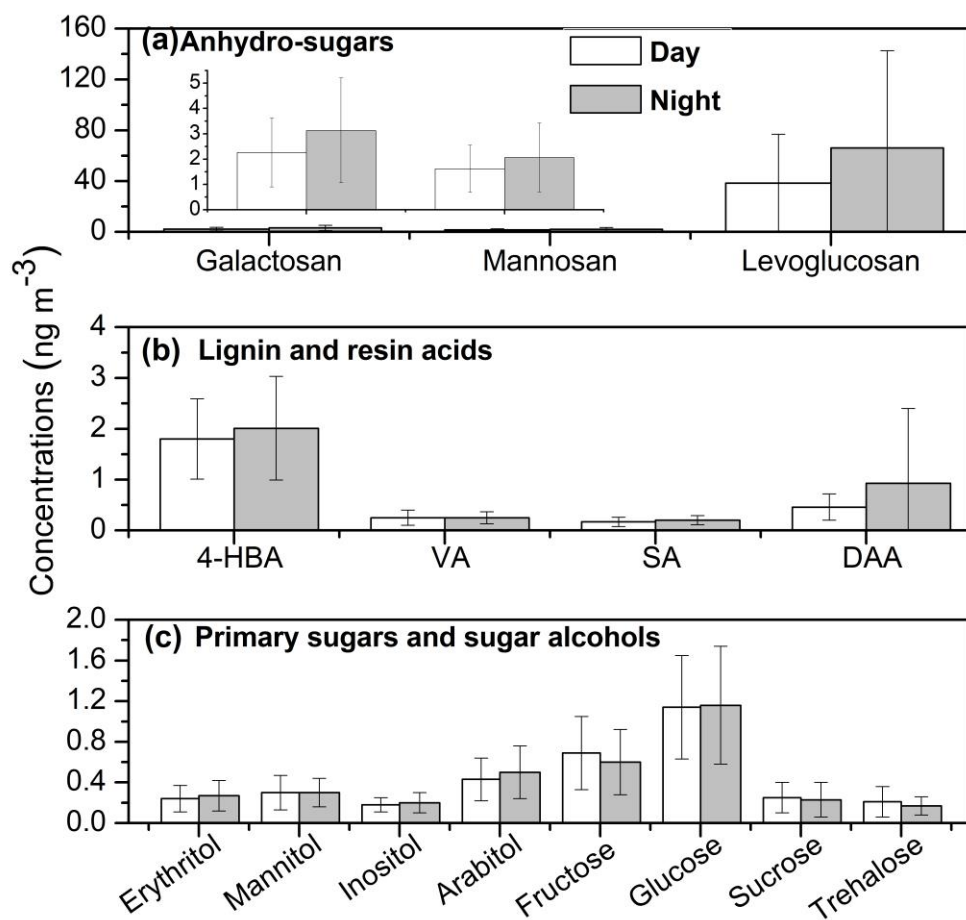

1186

1187

1188

1189

1190

**Figure 5.** Molecular distributions of anhydro-sugars, lignin and resin acids and sugars/sugar alcohols in Nanjing aerosols. [4-HBA: 4-hydroxybenzoic acid , VA: vanillic acid, SA: syringic acid and DAA: dehydroabiatic acid ].

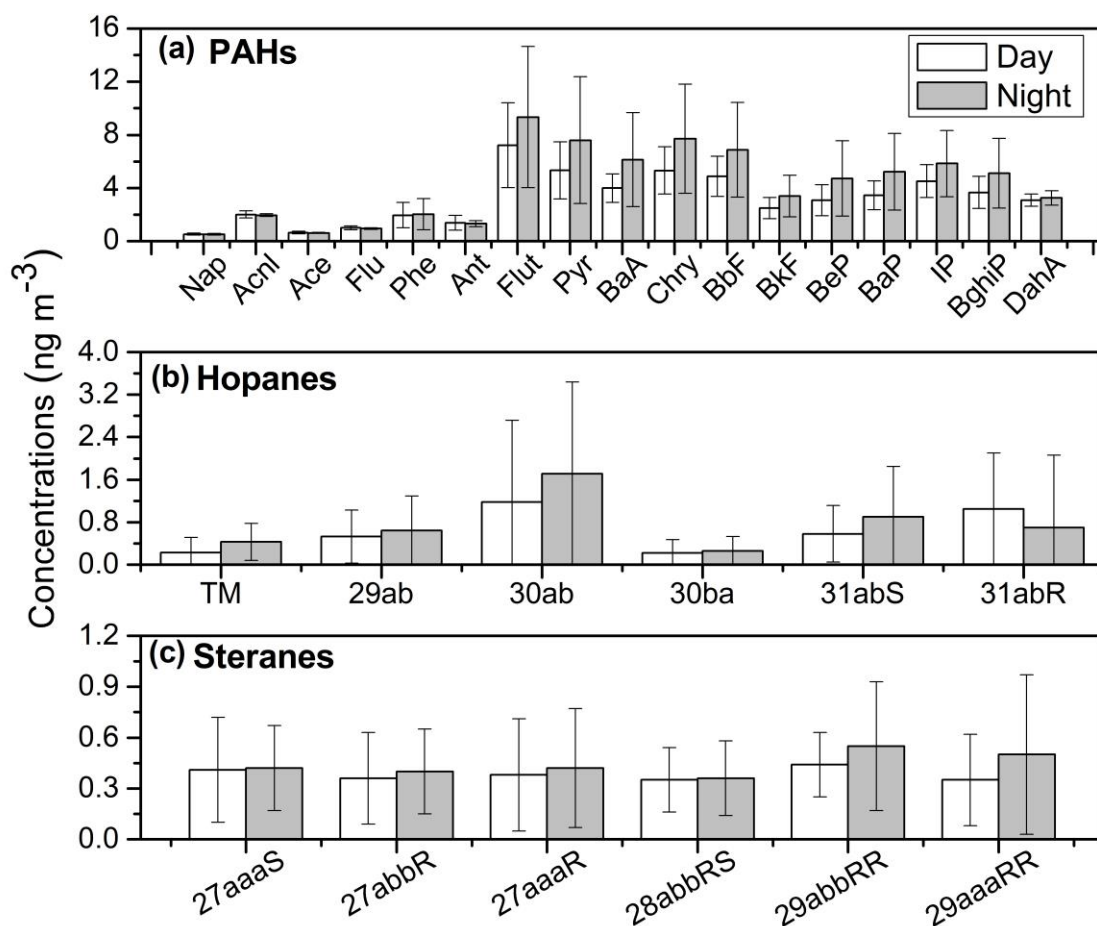

1191

1192

1193

1194

1195

1196

1197

1198

**Figure 6.** Molecular distributions of PAHs, hopanes and steranes in winter aerosols from Nanjing, China. [Abbreviation of PAHs: naphthalene, Nap; acenaphthylene, Acnl; acenaphthene, Ace; fluorene, Flu; phenanthrene, Phe; anthracene, Ant; fluoranthene, Flut; pyrene, Pyr; benzo[a]anthracene, BaA; chrysene, Chry; benzo(b)fluoranthene, BbF; benzo(k)fluoranthene, BkF; benzo(e)pyrene, BeP; benzo(a)pyrene, BaP; indeno(1,2,3-cd)pyrene, IP; benzo(ghi)perylene, BghiP; Dibenzo[a,h] anthracene, DahA].



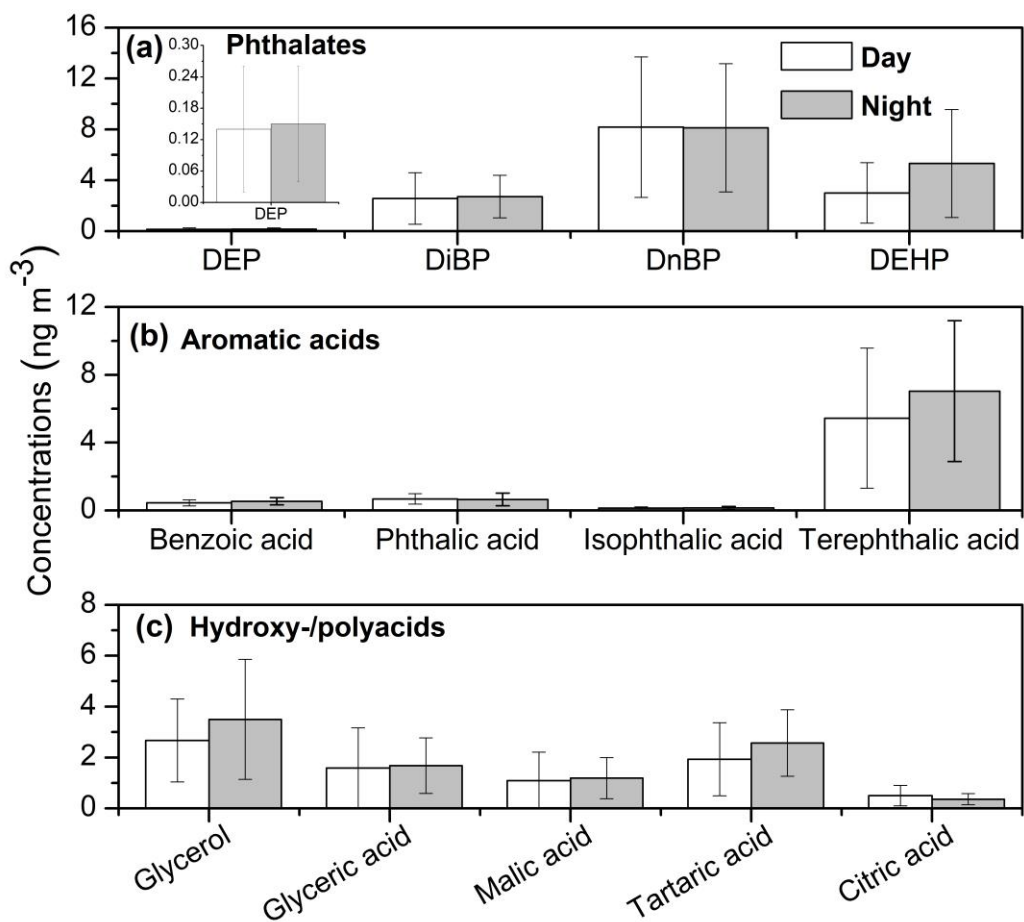

1199

1200  
1201

**Figure 7.** Molecular distributions of phthalates, aromatic acids and hydroxy-/polyacids in Nanjing aerosols.

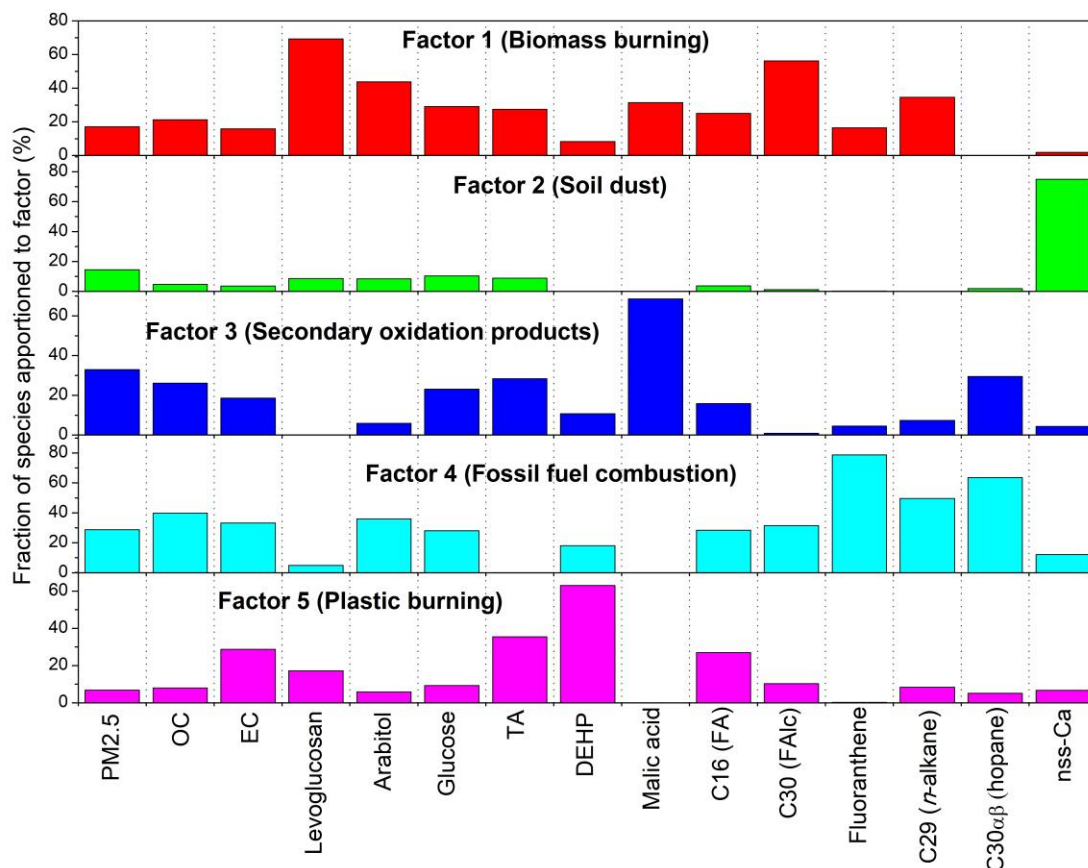

**Figure 8.** Composition profiles (% of total of each species) for the five factors resolved by PMF based on data from Nanjing winter aerosols from 11 December 2014 to 11 January 2015. [TA: terephthalic acid, DEHP: di-(2-ethylhexyl) phthalate, FA: fatty acid, FAIc: fatty alcohol].

1202

1203

1204

1205

1206

1207

1208

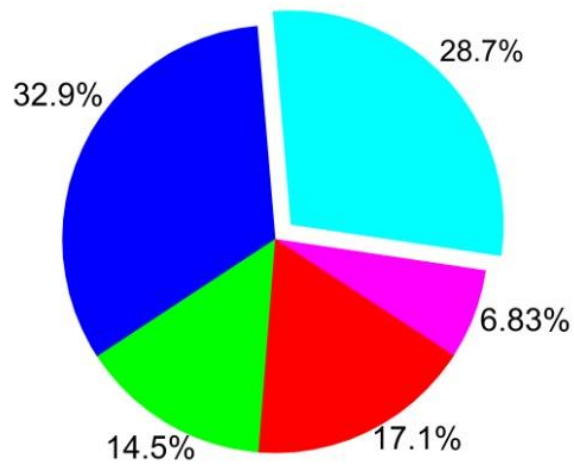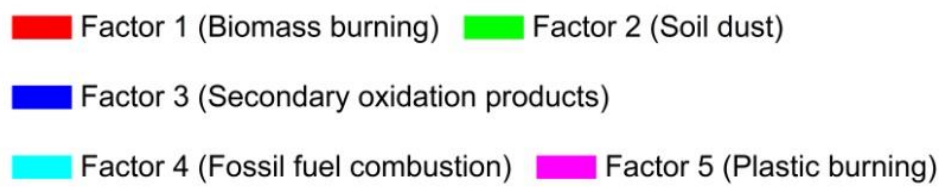

1209

1210

1211

1212

**Figure 9.** Pie diagrams showing the estimated source contributions of five factors resolved by PMF to the  $PM_{2.5}$  in Nanjing aerosols.

1 Supporting information for

2 **Characterization of organic aerosols from a Chinese Mega-City during winter:**  
3 **predominance of fossil fuel combustion**

4

5 **Md. Mozammel Haque<sup>1,2,3</sup>, Kimitaka Kawamura<sup>2</sup>, Dhananjay K. Deshmukh<sup>2</sup>, Cao**  
6 **Fang<sup>1,3</sup>, Wenhui Song<sup>1,3</sup>, Bao Mengying<sup>1,3</sup> and Yan-Lin Zhang<sup>1,3\*</sup>**

7

8 <sup>1</sup> *Yale-NUIST Center on Atmospheric Environment, Department of Applied Meteorology,*  
9 *Nanjing University of Information Science and Technology, Nanjing 10044, China*

10 <sup>2</sup> *Chubu Institute for Advanced Studies, Chubu University, Kasugai 487-8501, Japan*

11 <sup>3</sup> *Key Laboratory of Meteorological Disaster, Ministry of Education & Collaborative*  
12 *Innovation Center on Forecast and Evaluation of Meteorological Disasters, Nanjing*  
13 *University of Information Science and Technology, Nanjing 10044, China*

14

15

16 \*Corresponding author: Yan-Lin Zhang

17 E-mail: dryanlinzhang@outlook.com

18

19

20

21

22

23

24

25

26

27

28

29

30

31

32

33 **Table S1.** Concentrations of identified organic compounds (ng m<sup>-3</sup>) in the atmospheric aerosol  
 34 samples (PM<sub>2.5</sub>) from Nanjing, China.  
 35

| Compounds                               | Daytime |                  |                  |                 | Nighttime |                  |                  |                 |
|-----------------------------------------|---------|------------------|------------------|-----------------|-----------|------------------|------------------|-----------------|
|                                         | Mean    | Min <sup>a</sup> | Max <sup>b</sup> | SD <sup>c</sup> | Mean      | Min <sup>a</sup> | Max <sup>b</sup> | SD <sup>c</sup> |
| <i>n</i> -Alkanes                       |         |                  |                  |                 |           |                  |                  |                 |
| C <sub>13</sub>                         | 1.91    | 1.59             | 3.27             | 0.29            | 1.93      | 1.58             | 3.50             | 0.39            |
| C <sub>14</sub>                         | 1.24    | 0.89             | 2.16             | 0.27            | 1.17      | 0.93             | 1.79             | 0.22            |
| C <sub>15</sub>                         | 1.26    | 0.82             | 1.97             | 0.25            | 1.11      | 0.77             | 1.60             | 0.23            |
| C <sub>16</sub>                         | 0.35    | 0.00             | 0.88             | 0.27            | 0.32      | 0.00             | 0.96             | 0.28            |
| C <sub>17</sub>                         | 1.04    | 0.37             | 2.41             | 0.45            | 0.99      | 0.39             | 1.99             | 0.34            |
| C <sub>18</sub>                         | 1.11    | 0.32             | 2.66             | 0.48            | 1.22      | 0.58             | 2.78             | 0.48            |
| C <sub>19</sub>                         | 2.50    | 1.17             | 5.69             | 1.11            | 2.65      | 1.05             | 7.30             | 1.42            |
| C <sub>20</sub>                         | 3.79    | 1.09             | 7.99             | 1.60            | 4.64      | 1.01             | 15.5             | 2.76            |
| C <sub>21</sub>                         | 6.28    | 3.30             | 12.9             | 2.26            | 8.31      | 2.50             | 25.7             | 4.75            |
| C <sub>22</sub>                         | 10.1    | 5.02             | 27.5             | 4.31            | 14.0      | 2.77             | 33.7             | 7.53            |
| C <sub>23</sub>                         | 13.0    | 6.10             | 38.5             | 6.08            | 17.1      | 3.22             | 44.6             | 8.86            |
| C <sub>24</sub>                         | 12.6    | 6.59             | 36.0             | 6.03            | 16.9      | 2.94             | 46.1             | 8.27            |
| C <sub>25</sub>                         | 12.7    | 5.57             | 36.4             | 6.39            | 16.4      | 2.60             | 44.6             | 8.21            |
| C <sub>26</sub>                         | 11.3    | 4.97             | 28.9             | 5.77            | 15.3      | 3.43             | 34.9             | 6.62            |
| C <sub>27</sub>                         | 12.3    | 5.25             | 33.7             | 6.19            | 15.6      | 2.97             | 32.9             | 6.65            |
| C <sub>28</sub>                         | 9.19    | 4.80             | 29.3             | 5.01            | 11.9      | 3.14             | 24.2             | 4.74            |
| C <sub>29</sub>                         | 14.0    | 5.76             | 44.9             | 8.00            | 17.9      | 3.05             | 43.5             | 8.27            |
| C <sub>30</sub>                         | 8.03    | 4.36             | 25.9             | 4.51            | 10.8      | 3.20             | 21.8             | 4.06            |
| C <sub>31</sub>                         | 10.9    | 4.80             | 35.9             | 6.06            | 13.7      | 4.01             | 35.6             | 6.15            |
| C <sub>32</sub>                         | 5.56    | 3.09             | 14.9             | 2.28            | 6.87      | 4.18             | 13.1             | 1.98            |
| C <sub>33</sub>                         | 6.48    | 4.01             | 18.5             | 2.79            | 7.55      | 3.55             | 18.5             | 2.87            |
| C <sub>34</sub>                         | 4.80    | 3.57             | 9.94             | 1.36            | 5.56      | 4.04             | 10.2             | 1.40            |
| C <sub>35</sub>                         | 4.73    | 3.61             | 9.29             | 1.20            | 5.06      | 3.80             | 9.37             | 1.15            |
| C <sub>36</sub>                         | 4.77    | 4.10             | 8.02             | 0.91            | 4.61      | 3.95             | 6.78             | 0.57            |
| C <sub>37</sub>                         | 5.00    | 4.35             | 8.80             | 0.80            | 4.76      | 4.35             | 5.97             | 0.35            |
| C <sub>38</sub>                         | 5.35    | 4.67             | 9.46             | 0.85            | 5.01      | 4.75             | 5.53             | 0.20            |
| C <sub>39</sub>                         | 6.71    | 5.89             | 11.6             | 1.04            | 6.41      | 5.64             | 7.79             | 0.53            |
| Subtotal                                | 177     | 96.1             | 467              | 76.6            | 218       | 74.4             | 500              | 89.3            |
| CPI (C <sub>20</sub> –C <sub>39</sub> ) | 1.28    | 1.18             | 1.32             | 1.32            | 1.24      | 1.10             | 1.37             | 1.35            |
| Plant Wax Alkanes                       |         |                  |                  |                 |           |                  |                  |                 |
| C <sub>23</sub>                         | 1.64    | 0.30             | 6.72             | 1.19            | 1.80      | 0.00             | 4.98             | 1.56            |
| C <sub>25</sub>                         | 0.81    | 0.00             | 3.93             | 0.82            | 0.76      | 0.00             | 4.13             | 1.07            |
| C <sub>27</sub>                         | 2.02    | 0.00             | 5.28             | 1.18            | 2.00      | 0.00             | 5.69             | 1.65            |
| C <sub>29</sub>                         | 5.42    | 0.47             | 17.4             | 3.58            | 6.55      | 0.00             | 20.5             | 4.47            |
| C <sub>31</sub>                         | 4.08    | 0.25             | 15.5             | 2.87            | 4.82      | 0.00             | 18.2             | 3.54            |
| C <sub>33</sub>                         | 1.30    | 0.10             | 6.05             | 1.15            | 1.36      | 0.00             | 6.85             | 1.38            |
| C <sub>35</sub>                         | 0.16    | 0.00             | 0.86             | 0.26            | 0.22      | 0.00             | 1.04             | 0.33            |
| C <sub>37</sub>                         | 0.10    | 0.00             | 0.53             | 0.17            | 0.10      | 0.00             | 0.74             | 0.19            |
| Subtotal                                | 15.5    | 1.12             | 56.2             | 11.2            | 17.6      | 0                | 62.1             | 14.2            |

36

37

38 **Table 1. (Continued)**

| Compounds                                   | Daytime |                  |                  |                 | Nighttime |                  |                  |                 |
|---------------------------------------------|---------|------------------|------------------|-----------------|-----------|------------------|------------------|-----------------|
|                                             | Mean    | Min <sup>a</sup> | Max <sup>b</sup> | SD <sup>c</sup> | Mean      | Min <sup>a</sup> | Max <sup>b</sup> | SD <sup>c</sup> |
| Fatty acids                                 |         |                  |                  |                 |           |                  |                  |                 |
| C <sub>12:0</sub>                           | 0.54    | 0.12             | 2.04             | 0.44            | 0.60      | 0.19             | 1.57             | 0.31            |
| C <sub>13:0</sub>                           | 0.55    | 0.11             | 2.08             | 0.40            | 0.74      | 0.03             | 2.38             | 0.57            |
| C <sub>14:0</sub>                           | 0.81    | 0.27             | 2.48             | 0.39            | 1.05      | 0.21             | 1.87             | 0.40            |
| C <sub>15:0</sub>                           | 0.61    | 0.19             | 1.88             | 0.34            | 0.69      | 0.05             | 1.50             | 0.29            |
| C <sub>16:0</sub>                           | 18.9    | 5.12             | 56.8             | 11.2            | 30.5      | 3.87             | 89.2             | 20.9            |
| C <sub>17:0</sub>                           | 0.60    | 0.18             | 1.99             | 0.37            | 0.77      | 0.11             | 1.80             | 0.36            |
| C <sub>18:0</sub>                           | 7.46    | 1.88             | 23.4             | 4.11            | 12.2      | 1.48             | 28.9             | 7.16            |
| C <sub>19:0</sub>                           | 0.36    | 0.08             | 1.07             | 0.23            | 0.48      | 0.02             | 1.41             | 0.30            |
| C <sub>20:0</sub>                           | 1.40    | 0.38             | 5.06             | 0.92            | 1.78      | 0.18             | 4.19             | 0.92            |
| C <sub>21:0</sub>                           | 0.81    | 0.14             | 2.87             | 0.57            | 0.96      | 0.03             | 2.32             | 0.55            |
| C <sub>22:0</sub>                           | 2.70    | 0.57             | 10.4             | 1.90            | 3.16      | 0.17             | 7.51             | 1.85            |
| C <sub>23:0</sub>                           | 1.94    | 0.43             | 8.47             | 1.55            | 2.38      | 0.10             | 5.41             | 1.34            |
| C <sub>24:0</sub>                           | 16.8    | 3.28             | 73.8             | 13.5            | 19.4      | 1.51             | 50.9             | 11.7            |
| C <sub>25:0</sub>                           | 1.11    | 0.16             | 4.34             | 0.82            | 1.37      | 0.00             | 3.45             | 0.85            |
| C <sub>26:0</sub>                           | 2.75    | 0.37             | 10.6             | 2.08            | 3.22      | 0.10             | 9.07             | 2.09            |
| C <sub>27:0</sub>                           | 0.62    | 0.09             | 1.94             | 0.46            | 0.74      | 0.00             | 2.07             | 0.54            |
| C <sub>28:0</sub>                           | 2.27    | 0.38             | 10.3             | 1.95            | 2.86      | 0.23             | 6.88             | 1.81            |
| C <sub>29:0</sub>                           | 0.63    | 0.09             | 2.88             | 0.56            | 0.79      | 0.00             | 2.10             | 0.49            |
| C <sub>30:0</sub>                           | 2.35    | 0.34             | 12.6             | 2.32            | 2.99      | 0.17             | 9.40             | 2.14            |
| C <sub>31:0</sub>                           | 0.26    | 0.00             | 1.38             | 0.25            | 0.35      | 0.05             | 1.17             | 0.28            |
| C <sub>32:0</sub>                           | 1.13    | 0.00             | 7.48             | 1.44            | 1.55      | 0.07             | 6.04             | 1.35            |
| C <sub>18:1</sub>                           | 0.36    | 0.04             | 1.62             | 0.33            | 0.39      | 0.00             | 1.66             | 0.37            |
| C <sub>18:2</sub>                           | 1.81    | 0.10             | 8.18             | 1.80            | 2.31      | 0.00             | 10.9             | 2.58            |
| Subtotal                                    | 66.8    | 14.3             | 254              | 47.9            | 91.3      | 8.57             | 252              | 59.2            |
| CPI (C <sub>20:0</sub> -C <sub>32:0</sub> ) | 5.41    | 4.24             | 6.50             | 0.54            | 5.52      | 4.29             | 13.2             | 1.51            |
| Fatty alcohols                              |         |                  |                  |                 |           |                  |                  |                 |
| C <sub>12</sub>                             | 1.74    | 0.26             | 5.76             | 1.12            | 1.99      | 0.16             | 7.33             | 1.38            |
| C <sub>14</sub>                             | 3.58    | 0.70             | 23.9             | 4.11            | 4.13      | 0.10             | 11.6             | 2.60            |
| C <sub>15</sub>                             | 0.60    | 0.22             | 1.81             | 0.39            | 0.66      | 0.05             | 1.33             | 0.38            |
| C <sub>16</sub>                             | 0.66    | 0.16             | 1.60             | 0.34            | 0.71      | 0.05             | 2.32             | 0.45            |
| C <sub>17</sub>                             | 0.42    | 0.10             | 1.30             | 0.26            | 0.46      | 0.13             | 1.98             | 0.34            |
| C <sub>18</sub>                             | 0.91    | 0.19             | 2.33             | 0.57            | 1.43      | 0.13             | 6.35             | 1.25            |
| C <sub>19</sub>                             | 0.54    | 0.15             | 2.09             | 0.35            | 0.56      | 0.15             | 1.34             | 0.30            |
| C <sub>20</sub>                             | 1.08    | 0.18             | 2.71             | 0.66            | 1.11      | 0.27             | 3.06             | 0.63            |
| C <sub>21</sub>                             | 0.74    | 0.15             | 2.98             | 0.56            | 0.75      | 0.12             | 2.12             | 0.45            |
| C <sub>22</sub>                             | 1.76    | 0.47             | 6.37             | 1.26            | 2.11      | 0.13             | 6.92             | 1.44            |
| C <sub>23</sub>                             | 0.68    | 0.14             | 1.97             | 0.43            | 0.92      | 0.23             | 2.92             | 0.60            |
| C <sub>24</sub>                             | 1.22    | 0.19             | 7.86             | 1.31            | 1.28      | 0.16             | 3.50             | 0.77            |
| C <sub>25</sub>                             | 0.64    | 0.21             | 1.94             | 0.35            | 0.55      | 0.11             | 1.26             | 0.27            |
| C <sub>26</sub>                             | 2.99    | 0.18             | 10.7             | 2.03            | 3.34      | 0.68             | 7.77             | 1.93            |
| C <sub>27</sub>                             | 0.83    | 0.19             | 2.27             | 0.48            | 0.87      | 0.00             | 3.74             | 0.70            |
| C <sub>28</sub>                             | 5.72    | 1.17             | 19.3             | 3.69            | 6.44      | 1.09             | 18.7             | 3.62            |

40 **Table 1. (continued)**

| Compounds                               | Daytime |                  |                  |                 | Nighttime |                  |                  |                 |
|-----------------------------------------|---------|------------------|------------------|-----------------|-----------|------------------|------------------|-----------------|
|                                         | Mean    | Min <sup>a</sup> | Max <sup>b</sup> | SD <sup>c</sup> | Mean      | Min <sup>a</sup> | Max <sup>b</sup> | SD <sup>c</sup> |
| C <sub>29</sub>                         | 0.97    | 0.16             | 5.20             | 0.90            | 0.94      | 0.00             | 2.38             | 0.55            |
| C <sub>30</sub>                         | 8.73    | 1.87             | 51.7             | 8.66            | 11.6      | 0.87             | 32.6             | 6.36            |
| C <sub>31</sub>                         | 0.67    | 0.00             | 2.46             | 0.47            | 0.78      | 0.00             | 2.86             | 0.51            |
| C <sub>32</sub>                         | 2.39    | 0.61             | 10.4             | 1.91            | 3.14      | 0.18             | 9.29             | 2.15            |
| Subtotal                                | 36.9    | 7.30             | 165              | 29.9            | 43.8      | 4.61             | 129              | 26.7            |
| CPI (C <sub>20</sub> -C <sub>32</sub> ) | 5.22    | 2.56             | 10.3             | 1.67            | 6.32      | 3.06             | 15.5             | 2.45            |
| Anhydro-sugars                          |         |                  |                  |                 |           |                  |                  |                 |
| Galactosan                              | 2.26    | 0.65             | 7.47             | 1.36            | 3.13      | 0.48             | 7.75             | 2.07            |
| Mannosan                                | 1.62    | 0.36             | 4.30             | 0.93            | 2.06      | 0.27             | 5.73             | 1.36            |
| Levoglucosan                            | 38.4    | 4.79             | 179              | 38.6            | 66.0      | 4.96             | 354              | 76.7            |
| Subtotal                                | 42.3    | 5.8              | 191              | 40.9            | 71.2      | 5.71             | 367              | 80.1            |
| Sugars                                  |         |                  |                  |                 |           |                  |                  |                 |
| Erythritol                              | 0.24    | 0.04             | 0.64             | 0.13            | 0.27      | 0.02             | 0.58             | 0.15            |
| Mannitol                                | 0.30    | 0.09             | 0.91             | 0.17            | 0.30      | 0.07             | 0.70             | 0.14            |
| Inositol                                | 0.18    | 0.05             | 0.40             | 0.07            | 0.20      | 0.05             | 0.43             | 0.10            |
| Arabitol                                | 0.43    | 0.08             | 1.20             | 0.21            | 0.50      | 0.04             | 1.10             | 0.26            |
| Fructose                                | 0.69    | 0.15             | 1.45             | 0.36            | 0.60      | 0.11             | 1.50             | 0.32            |
| Glucose                                 | 1.14    | 0.27             | 2.77             | 0.51            | 1.16      | 0.20             | 2.86             | 0.58            |
| Sucrose                                 | 0.25    | 0.05             | 0.71             | 0.15            | 0.23      | 0.06             | 0.87             | 0.17            |
| Trehalose                               | 0.21    | 0.05             | 0.81             | 0.15            | 0.17      | 0.04             | 0.45             | 0.09            |
| Subtotal                                | 3.44    | 0.78             | 8.89             | 1.75            | 3.43      | 0.59             | 8.49             | 1.81            |
| Phthalate esters                        |         |                  |                  |                 |           |                  |                  |                 |
| Diethyl (DEP)                           | 0.14    | 0.03             | 0.57             | 0.12            | 0.15      | 0.03             | 0.50             | 0.11            |
| Diisobutyl (DiBP)                       | 2.56    | 0.59             | 8.54             | 2.03            | 2.72      | 0.63             | 7.19             | 1.67            |
| Di-n-butyl (DnBP)                       | 8.18    | 1.30             | 20.0             | 5.52            | 8.12      | 2.08             | 22.8             | 5.04            |
| Di-(2-ethylhexyl) (DEHP)                | 3.00    | 0.74             | 10.9             | 2.38            | 5.32      | 1.06             | 21.3             | 4.24            |
| Subtotal                                | 13.9    | 2.66             | 40.0             | 10.1            | 16.3      | 3.80             | 51.8             | 11.1            |
| Glycerol and Polyacids                  |         |                  |                  |                 |           |                  |                  |                 |
| Glycerol                                | 2.67    | 0.66             | 5.99             | 1.63            | 3.50      | 0.73             | 8.72             | 2.36            |
| Glyceric acid                           | 1.59    | 0.28             | 8.34             | 1.58            | 1.68      | 0.34             | 4.30             | 1.09            |
| Malic acid                              | 1.09    | 0.07             | 4.66             | 1.12            | 1.19      | 0.36             | 3.35             | 0.81            |
| Tartaric acid                           | 1.93    | 0.51             | 8.57             | 1.44            | 2.57      | 1.02             | 5.74             | 1.31            |
| Citric acid                             | 0.50    | 0.07             | 2.15             | 0.40            | 0.36      | 0.09             | 0.98             | 0.22            |
| Subtotal                                | 7.78    | 1.59             | 29.7             | 6.17            | 9.30      | 2.54             | 23.1             | 5.79            |
| Aromatic acids                          |         |                  |                  |                 |           |                  |                  |                 |
| Benzoic acid                            | 0.45    | 0.17             | 0.95             | 0.18            | 0.54      | 0.24             | 1.22             | 0.21            |
| Phthalic acid                           | 0.68    | 0.24             | 1.24             | 0.30            | 0.65      | 0.28             | 1.80             | 0.37            |
| Isophthalic acid                        | 0.13    | 0.03             | 0.33             | 0.08            | 0.14      | 0.05             | 0.40             | 0.10            |
| Terephthalic acid                       | 5.44    | 1.09             | 20.6             | 4.13            | 7.04      | 1.42             | 15.0             | 4.15            |
| Subtotal                                | 6.70    | 1.53             | 23.1             | 4.69            | 8.37      | 1.99             | 18.4             | 4.83            |

42 **Table 1. (Continued)**

| Compounds                                     | Daytime |                  |                  |                 | Nighttime |                  |                  |                 |
|-----------------------------------------------|---------|------------------|------------------|-----------------|-----------|------------------|------------------|-----------------|
|                                               | Mean    | Min <sup>a</sup> | Max <sup>b</sup> | SD <sup>c</sup> | Mean      | Min <sup>a</sup> | Max <sup>b</sup> | SD <sup>c</sup> |
| Lignin and Resin products                     |         |                  |                  |                 |           |                  |                  |                 |
| 4-Hydroxybenzoic acid                         | 1.80    | 0.65             | 4.31             | 0.79            | 2.01      | 0.62             | 4.96             | 1.02            |
| Vanillic acid                                 | 0.25    | 0.04             | 0.92             | 0.15            | 0.25      | 0.08             | 0.66             | 0.12            |
| Syringic acid                                 | 0.17    | 0.04             | 0.57             | 0.09            | 0.20      | 0.05             | 0.43             | 0.09            |
| Dehydroabietic acid                           | 0.46    | 0.11             | 1.16             | 0.26            | 0.93      | 0.00             | 8.29             | 1.47            |
| Subtotal                                      | 2.68    | 0.84             | 6.96             | 1.29            | 3.39      | 0.75             | 14.3             | 2.70            |
| PAHs                                          |         |                  |                  |                 |           |                  |                  |                 |
| Napthalene (Nap)                              | 0.52    | 0.45             | 0.80             | 0.07            | 0.51      | 0.41             | 0.60             | 0.05            |
| Acenaphthylene (Acnl)                         | 2.01    | 1.80             | 3.47             | 0.28            | 1.95      | 1.66             | 2.17             | 0.10            |
| Acenaphthene (Ace)                            | 0.64    | 0.56             | 1.22             | 0.11            | 0.61      | 0.55             | 0.69             | 0.04            |
| Fluorene (Flu)                                | 1.00    | 0.83             | 1.70             | 0.14            | 0.94      | 0.85             | 1.05             | 0.05            |
| Phenanthrene (Phe)                            | 1.95    | 0.68             | 4.52             | 0.96            | 2.03      | 0.33             | 4.62             | 1.17            |
| Anthracene (Ant)                              | 1.38    | 1.11             | 4.21             | 0.56            | 1.30      | 1.00             | 2.02             | 0.23            |
| Fluoranthene (Flut)                           | 7.21    | 3.01             | 18.2             | 3.19            | 9.34      | 2.14             | 27.6             | 5.33            |
| Pyrene (Pyr)                                  | 5.33    | 2.15             | 11.4             | 2.15            | 7.59      | 1.32             | 26.8             | 4.78            |
| Benzo[a]anthracene (BaA)                      | 3.98    | 2.37             | 6.44             | 1.07            | 6.14      | 1.87             | 14.8             | 3.54            |
| Chrysene (Chry)                               | 5.31    | 2.50             | 9.11             | 1.78            | 7.70      | 1.24             | 17.0             | 4.11            |
| Benzo[b]fluoranthene (BbF)                    | 4.88    | 2.42             | 8.40             | 1.52            | 6.88      | 1.51             | 14.4             | 3.57            |
| Benzo[k]fluoranthene (BkF)                    | 2.47    | 0.94             | 4.28             | 0.80            | 3.39      | 0.84             | 7.19             | 1.56            |
| Benzo[e]pyrene (BeP)                          | 3.08    | 1.39             | 6.01             | 1.18            | 4.71      | 0.68             | 11.6             | 2.84            |
| Benzo[a]pyrene (BaP)                          | 3.46    | 1.86             | 6.35             | 1.08            | 5.23      | 1.31             | 13.1             | 2.88            |
| Indeno[1,2,3-cd]pyrene (IP)                   | 4.52    | 2.85             | 8.01             | 1.24            | 6.50      | 2.11             | 24.5             | 4.21            |
| Benzo[ghi]perylene (BghiP)                    | 3.66    | 1.91             | 6.93             | 1.22            | 5.85      | 1.40             | 26.1             | 4.64            |
| Dibenzo[a,h]anthracene (DahA)                 | 3.08    | 2.70             | 5.19             | 0.46            | 4.11      | 2.49             | 28.7             | 4.68            |
| Subtotal                                      | 54.5    | 29.5             | 106              | 17.8            | 74.8      | 21.7             | 223              | 43.8            |
| Hopanes                                       |         |                  |                  |                 |           |                  |                  |                 |
| 17 $\alpha$ (H)-22,29,30-Trisnorhopane        | 0.23    | 0.00             | 1.51             | 0.28            | 0.43      | 0.03             | 1.46             | 0.35            |
| 17 $\alpha$ (H)-21 $\beta$ (H)-30-Norhopane   | 0.53    | 0.03             | 2.65             | 0.50            | 0.64      | 0.03             | 3.39             | 0.65            |
| 17 $\alpha$ (H)-21 $\beta$ (H)-Hopane         | 1.18    | 0.02             | 8.91             | 1.54            | 1.71      | 0.07             | 8.88             | 1.73            |
| 17 $\beta$ (H)-21 $\alpha$ (H)-Hopane         | 0.22    | 0.01             | 1.12             | 0.25            | 0.26      | 0.00             | 0.93             | 0.27            |
| 17 $\alpha$ (H)-21 $\beta$ (H)-22S-Homohopane | 0.58    | 0.00             | 2.07             | 0.53            | 0.90      | 0.00             | 3.94             | 0.95            |
| 17 $\alpha$ (H)-21 $\beta$ (H)-22R-Homohopane | 1.05    | 0.01             | 4.58             | 1.05            | 0.70      | 0.00             | 7.52             | 1.36            |
| Subtotal                                      | 3.79    | 0.07             | 20.8             | 4.15            | 4.64      | 0.13             | 26.1             | 5.31            |
| Steranes                                      |         |                  |                  |                 |           |                  |                  |                 |
| $\alpha\alpha\alpha$ 20S-Cholestane           | 0.41    | 0.19             | 1.64             | 0.31            | 0.42      | 0.18             | 1.42             | 0.25            |
| $\alpha\beta\beta$ 20R-Cholestane             | 0.36    | 0.18             | 1.74             | 0.27            | 0.40      | 0.17             | 1.43             | 0.25            |
| $\alpha\alpha\alpha$ 20R-Cholestane           | 0.38    | 0.18             | 1.98             | 0.33            | 0.42      | 0.18             | 2.01             | 0.35            |
| $\alpha\beta\beta$ 20R, 24S-Methylcholestane  | 0.35    | 0.19             | 1.13             | 0.19            | 0.36      | 0.16             | 1.25             | 0.22            |
| $\alpha\beta\beta$ 20R, 24R-Ethylcholestane   | 0.44    | 0.22             | 1.06             | 0.19            | 0.55      | 0.23             | 2.34             | 0.38            |
| $\alpha\alpha\alpha$ 20R, 24R-Ethylcholestane | 0.35    | 0.17             | 1.60             | 0.27            | 0.50      | 0.16             | 2.65             | 0.47            |
| Subtotal                                      | 2.29    | 1.13             | 9.15             | 1.56            | 2.65      | 1.08             | 11.1             | 1.92            |

<sup>a</sup>Minimum, <sup>b</sup>Maximum, <sup>c</sup>Standard deviation

CPI: carbon preference index:  $(C_{21}+C_{23}+C_{25}+C_{27}+C_{29}+C_{31}+C_{33}+C_{35}+C_{37}+C_{39})/(C_{20}+C_{22}+C_{24}+C_{26}+C_{28}+C_{30}+C_{32}+C_{34}+C_{36}+C_{38})$  for n-alkanes;  $(C_{20}+C_{22}+C_{24}+C_{26}+C_{28}+C_{30}+C_{32})/(C_{21}+C_{23}+C_{25}+C_{27}+C_{29}+C_{31})$  for fatty acids;  $(C_{20}+C_{22}+C_{24}+C_{26}+C_{28}+C_{30}+C_{32})/(C_{21}+C_{23}+C_{25}+C_{27}+C_{29}+C_{31})$  for fatty alcohols.



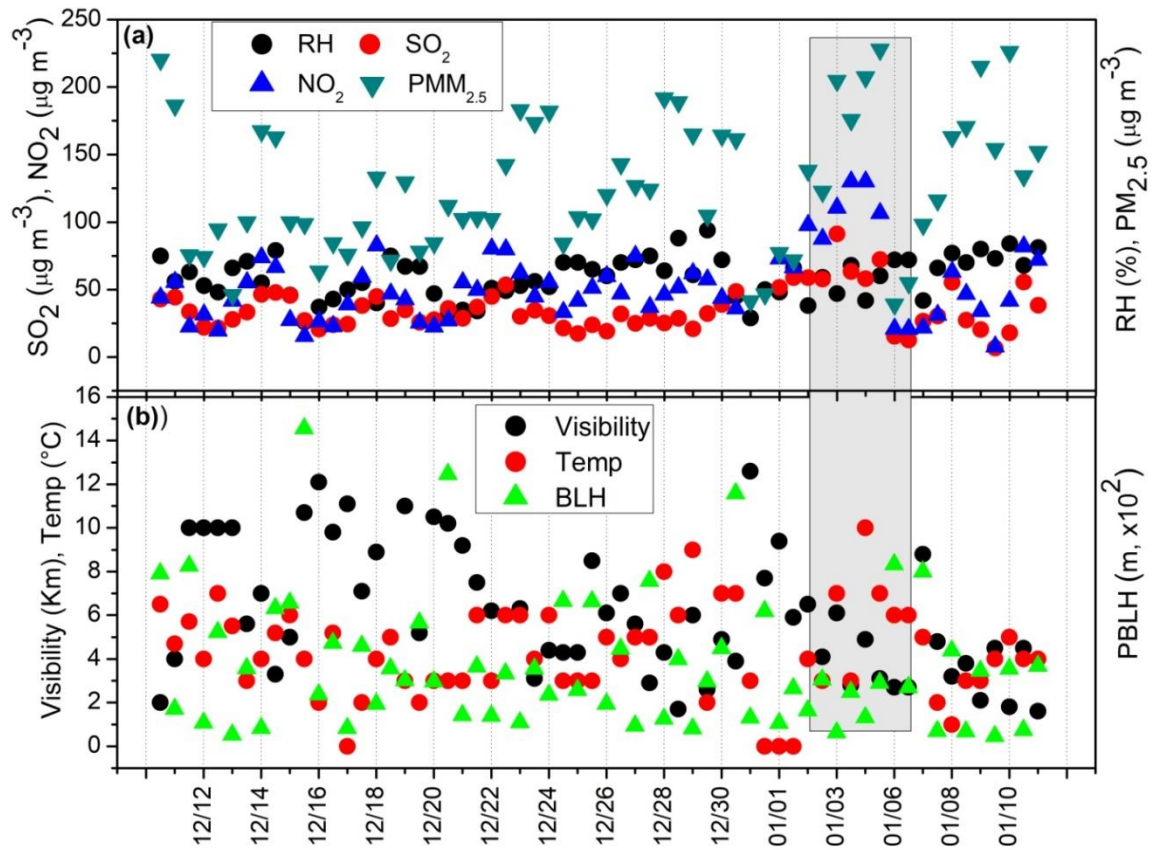

44

45 **Figure S1.** Diurnal variations of (a)  $\text{SO}_2$ ,  $\text{NO}_2$ , Relative Humidity (RH), and  $\text{PM}_{2.5}$  (b)  
 46 Visibility, Temperature (Temp) and Planetary Boundary Layer Height (PBLH) in Nanjing  
 47 aerosols during study period.

48

49

50

51

52

53

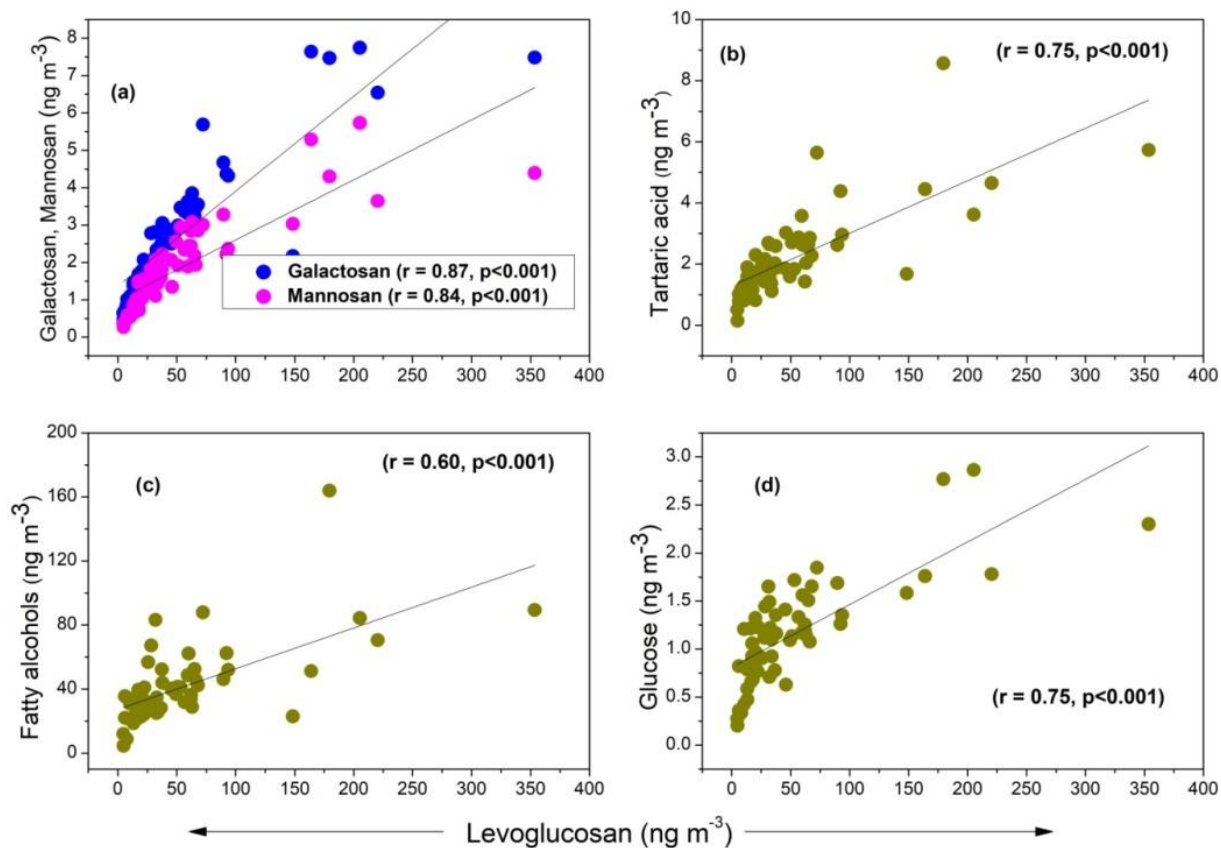

54

55 **Figure S2.** Correlation coefficients of levoglucosan with galactosan, mannosan, glucose, tartaric acid  
 56 and fatty alcohols in urban aerosols in Nanjing.

57

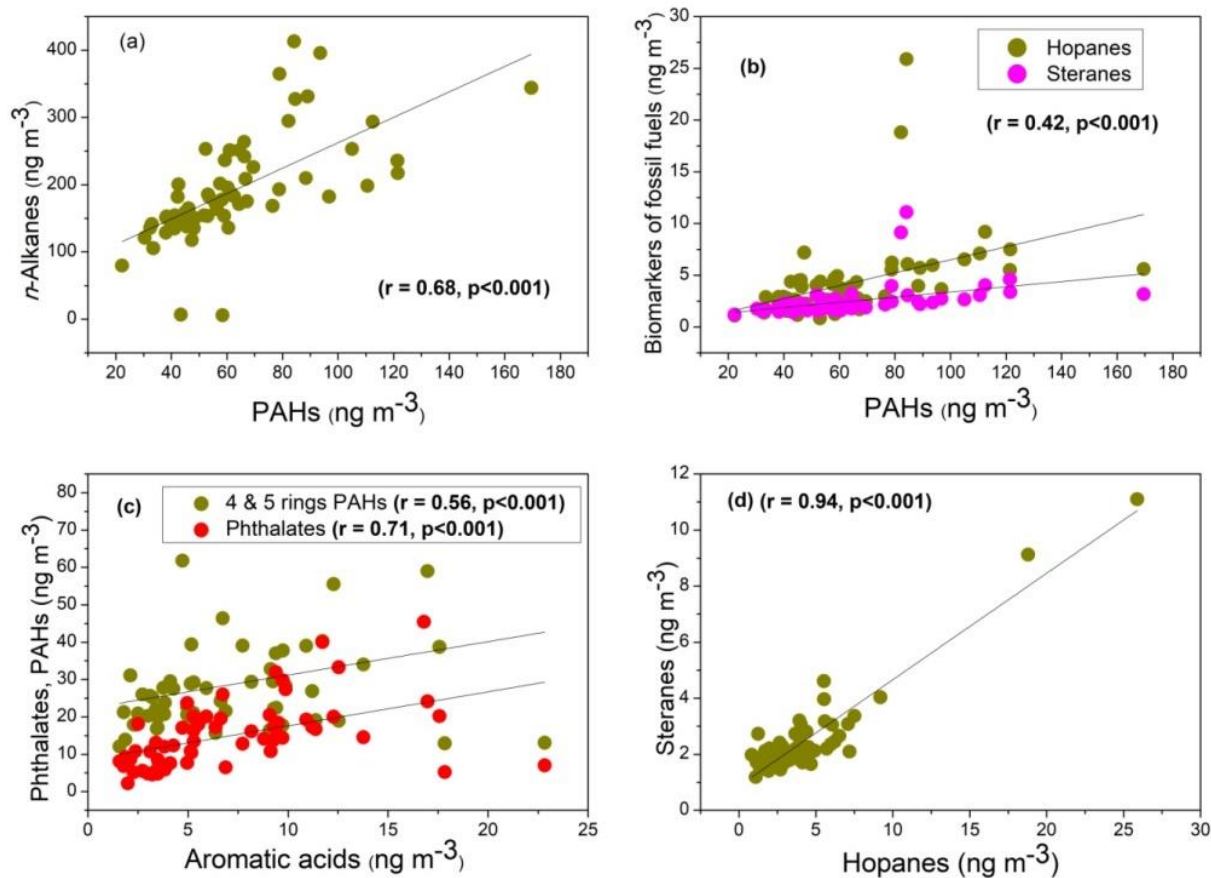

58

59 **Figure S3.** Correlations between the concentrations of (a) PAHs and  $n$ -alkanes (b) PAHs and  
 60 hopanes/steranes (c) aromatic acids and phthalates/PAHs (d) hopanes and steranes.

61

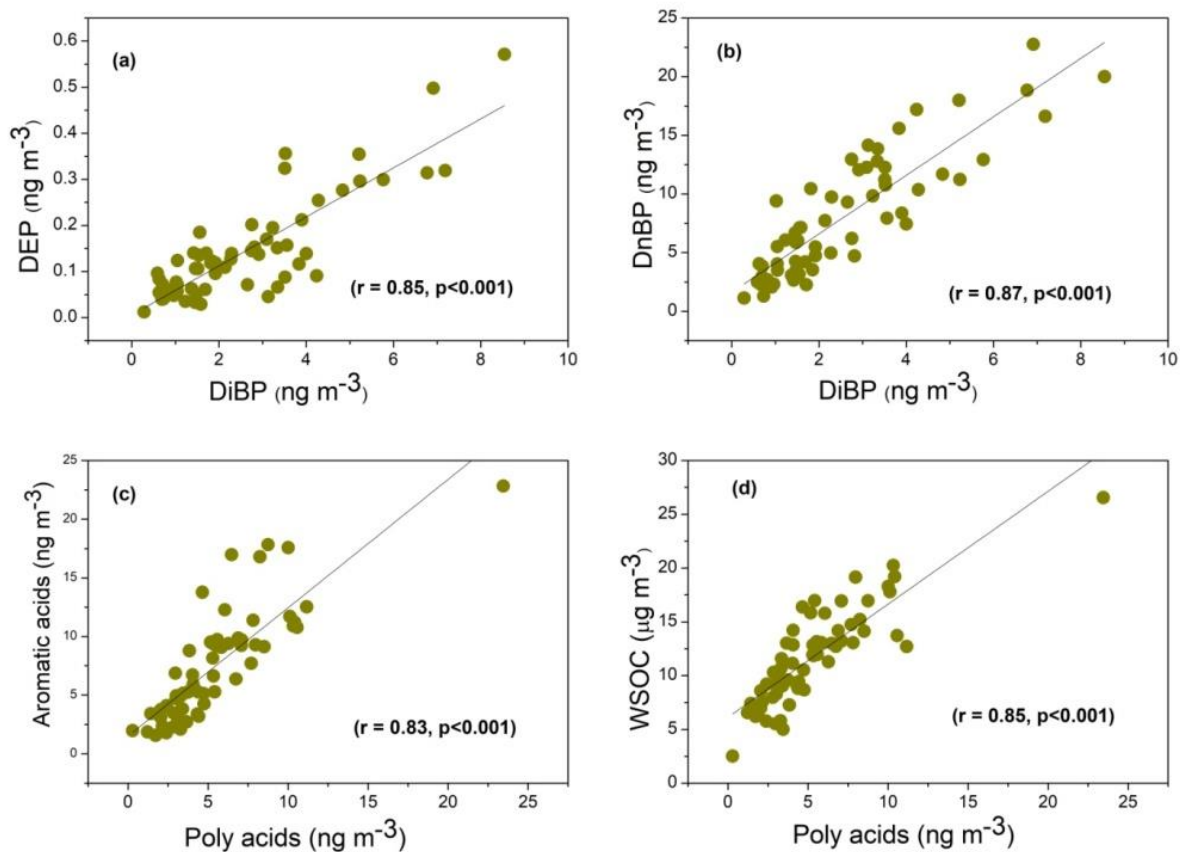

62

63 **Figure S4.** Relationships between the concentrations of (a) DiBP (di-iso-butyl phthalate) and DEP  
 64 (diethyl phthalate) (b) DiBP (di-iso-butyl phthalate) and DnBP (di-n-butyl phthalate) (c) poly acids  
 65 and aromatic acids (d) poly acids and WSOC.

66

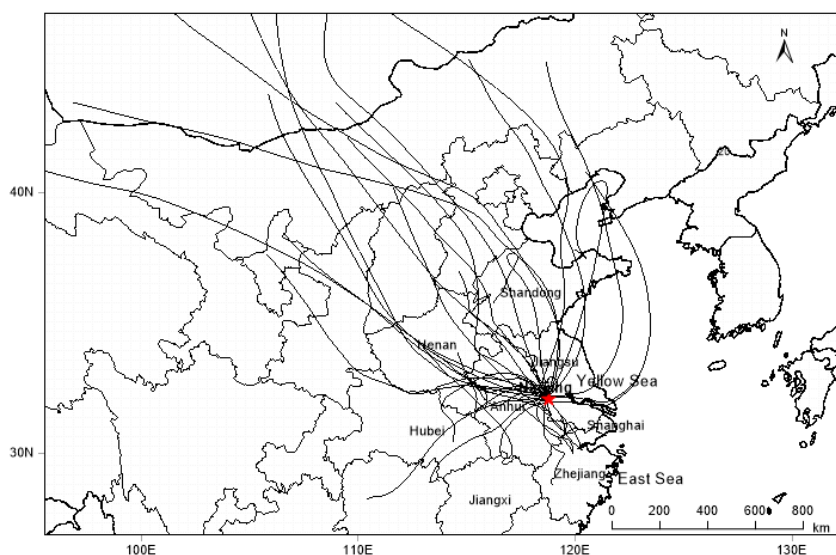

67

68 **Figure S5.** 48 hrs backward air mass trajectories arriving at 500 m above the ground level to Nanjing,  
 69 China during 11 Dec 2014–11 Jan 2015.
